# Supplementary material
Source: PubMed Central journal article supplement (PMC2993180)

# Grassypeptolides A–C, Cytotoxic Bis-Thiazoline Containing Marine Cyclodepsipeptides

*Jason C. Kwan, Ranjala Ratnayake, Khalil A. Abboud, Valerie J. Paul, and Hendrik Luesch*

Department of Medicinal Chemistry, University of Florida, 1600 SW Archer Road, Gainesville,  
Florida 32610, Department of Chemistry, 214 Leigh Hall, University of Florida, Gainesville,  
Florida 32611 and Smithsonian Marine Station, 701 Seaway Drive, Fort Pierce, Florida 34949

| Contents                                                                                          | Page |
|---------------------------------------------------------------------------------------------------|------|
| Table S1. NMR Spectral Data for Grassypeptolide B ( <b>2</b> ) in CDCl <sub>3</sub> (600 MHz)     | S 2  |
| Table S2. Distance Constraints Used in Molecular Modeling of Grassypeptolide C ( <b>3</b> )       | S 3  |
| Table S3. Angle Constraints Used in Molecular Modeling of Grassypeptolide C ( <b>3</b> )          | S 5  |
| Table S4. Energies and Constraint Violations of Grassypeptolide C ( <b>3</b> ) Molecular Models   | S 5  |
| Figure S1. Higher Energy Conformational Family of Grassypeptolide C ( <b>3</b> ) Molecular Models | S 6  |
| Table S5. Atom coordinates for modeled grassypeptolide C ( <b>3</b> ) structure 1                 | S 7  |
| Table S6. Atom coordinates for modeled grassypeptolide C ( <b>3</b> ) structure 2                 | S 11 |
| Table S7. Atom coordinates for modeled grassypeptolide C ( <b>3</b> ) structure 3                 | S 15 |
| Table S8. Atom coordinates for modeled grassypeptolide C ( <b>3</b> ) structure 4                 | S 19 |
| Table S9. Atom coordinates for modeled grassypeptolide C ( <b>3</b> ) structure 5                 | S 23 |
| Table S10. Atom coordinates for modeled grassypeptolide C ( <b>3</b> ) structure 6                | S 27 |
| Table S11. Atom coordinates for modeled grassypeptolide C ( <b>3</b> ) structure 7                | S 31 |
| Table S12. Atom coordinates for modeled grassypeptolide C ( <b>3</b> ) structure 8                | S 35 |
| Table S13. Atom coordinates for modeled grassypeptolide C ( <b>3</b> ) structure 9                | S 39 |
| Table S14. Atom coordinates for modeled grassypeptolide C ( <b>3</b> ) structure 10               | S 43 |
| <sup>1</sup> H NMR spectrum of grassypeptolide B ( <b>2</b> ) in CDCl <sub>3</sub> (600 MHz)      | S 47 |
| COSY spectrum of grassypeptolide B ( <b>2</b> ) in CDCl <sub>3</sub> (600 MHz)                    | S 48 |
| Edited HSQC spectrum of grassypeptolide B ( <b>2</b> ) in CDCl <sub>3</sub> (600 MHz)             | S 49 |
| HMBC spectrum of grassypeptolide B ( <b>2</b> ) in CDCl <sub>3</sub> (600 MHz)                    | S 50 |
| ROESY spectrum of grassypeptolide B ( <b>2</b> ) in CDCl <sub>3</sub> (600 MHz)                   | S 51 |
| <sup>1</sup> H NMR spectrum of grassypeptolide C ( <b>3</b> ) in CDCl <sub>3</sub> (600 MHz)      | S 52 |
| COSY spectrum of grassypeptolide C ( <b>3</b> ) in CDCl <sub>3</sub> (600 MHz)                    | S 53 |
| Edited HSQC spectrum of grassypeptolide C ( <b>3</b> ) in CDCl <sub>3</sub> (600 MHz)             | S 54 |
| HMBC spectrum of grassypeptolide C ( <b>3</b> ) in CDCl <sub>3</sub> (600 MHz)                    | S 55 |
| ROESY spectrum of grassypeptolide C ( <b>3</b> ) in CDCl <sub>3</sub> (600 MHz)                   | S 56 |

**Table S1.** NMR Spectral Data for Grassypeptolide B (**2**) in CDCl<sub>3</sub> (600 MHz)

| C/H no.         | $\delta_H$ (J in Hz) | $\delta_C^a$                | <sup>1</sup> H- <sup>1</sup> H COSY | HMBC <sup>b</sup>                             | ROESY                  |                                                                                                                                                                |
|-----------------|----------------------|-----------------------------|-------------------------------------|-----------------------------------------------|------------------------|----------------------------------------------------------------------------------------------------------------------------------------------------------------|
| Maba            | 1                    |                             | 172.7, s                            |                                               |                        |                                                                                                                                                                |
|                 | 2                    | 2.55, qd (7.0, 6.8)         | 45.5, d                             | H-3, H <sub>5</sub> -5                        | 1, 3, 4, 5             | H-3, H <sub>5</sub> -4, H <sub>5</sub> -5                                                                                                                      |
|                 | 3                    | 4.27, m                     | 48.3, d                             | H-2, H <sub>5</sub> -4, NH                    | 1, 2, 4, 6             | H-2, H <sub>5</sub> -4, H <sub>5</sub> -5, H-31/35, H52/56                                                                                                     |
|                 | 4                    | 1.22, d (6.7)               | 19.5, q                             | H-3                                           | 2, 3                   | H-2, H-3                                                                                                                                                       |
|                 | 5                    | 1.15, d (7.0)               | 14.5, q                             |                                               | 1, 2, 3                | H-2, H-3, H-52/56                                                                                                                                              |
| Thr             | NH                   | 7.31, m                     |                                     | H-3                                           |                        |                                                                                                                                                                |
|                 | 6                    |                             | 169.6, s                            |                                               |                        |                                                                                                                                                                |
|                 | 7                    | 4.49, dd (7.9, 6.7)         | 58.8, d                             | H-8, NH                                       | 6, 8, 9, 10            | H <sub>5</sub> -9, H-31/35, NH                                                                                                                                 |
|                 | 8                    | 4.03, m                     | 68.5, d                             | H-7, H <sub>5</sub> -9                        | 6                      | H <sub>5</sub> -9                                                                                                                                              |
|                 | 9                    | 1.29, d (6.4)               | 19.7, q                             | H-8                                           | 7, 8                   | H-7, H-8, H <sub>5</sub> -16, H <sub>5</sub> -22                                                                                                               |
| N-Me-Leu        | OH                   | 5.02, br <sup>c</sup>       |                                     |                                               |                        |                                                                                                                                                                |
|                 | NH                   | 7.13, d (7.9)               |                                     | H-7                                           | 10                     | H-7                                                                                                                                                            |
|                 | 10                   |                             | 170.3, s                            |                                               |                        |                                                                                                                                                                |
|                 | 11                   | 5.02, br                    | 56.1, d                             | H-12a, H-12b                                  |                        |                                                                                                                                                                |
|                 | 12a                  | 1.89, m                     | 36.4, t                             | H-11, H-12b                                   | 10, 11, 13, 15         | H-12b, H <sub>5</sub> -14, H <sub>5</sub> -16                                                                                                                  |
| Ala-thn-ca      | 12b                  | 1.76, ddd (-14.3, 7.9, 6.5) |                                     | H-11, H-12a, H-13                             | 10, 11, 13, 15         | H-12a, H <sub>5</sub> -14, H <sub>5</sub> -15                                                                                                                  |
|                 | 13                   | 1.59, m                     | 24.8, d                             | H-12b, H <sub>5</sub> -14, H <sub>5</sub> -15 | 12, 14                 | H <sub>5</sub> -14, H <sub>5</sub> -15, H <sub>5</sub> -16                                                                                                     |
|                 | 14                   | 1.02, d (6.6)               | 23.0, q                             | H-13                                          | 12, 13, 15             | H-12a, H-12b, H-13, H <sub>5</sub> -22                                                                                                                         |
|                 | 15                   | 0.96, d (6.4)               | 21.9, q                             | H-13                                          | 12, 13, 14             | H-12b, H-13                                                                                                                                                    |
|                 | 16                   | 3.22, s                     | 31.6, q                             |                                               | 11, 17                 | H <sub>5</sub> -9, H-12a, H-13, H-18, H-25, H-31/35, H <sub>5</sub> -45                                                                                        |
|                 | 17                   |                             | 170.2, s                            |                                               |                        |                                                                                                                                                                |
|                 | 18                   | 5.347, dd (10.4, 10.4)      | 77.6, d                             | H-19a, H-19b                                  | 20                     | H <sub>5</sub> -16, H-19a, H-19b                                                                                                                               |
|                 | 19a                  | 3.71, dd (-10.5, 10.4)      | 33.3, t                             | H-18, H-19b                                   | 17, 18, 20             | H-18, H-19b                                                                                                                                                    |
|                 | 19b                  | 3.33, dd (-10.5, 10.4)      |                                     | H-18, H-19a                                   | 17, 20                 | H-18, H-19a                                                                                                                                                    |
|                 | 20                   |                             | 178.9, s                            |                                               |                        |                                                                                                                                                                |
| N-Me-Phe-thn-ca | 21                   | 4.90, dq (7.5, 7.1)         | 48.2, d                             | H <sub>5</sub> -22, NH                        | 20, 22, 24             | H <sub>5</sub> -22, H-31/35, NH                                                                                                                                |
|                 | 22                   | 1.65, d (7.1)               | 18.0, q                             | H-21                                          | 20, 21                 | H <sub>5</sub> -9, H <sub>5</sub> -14, H-21, H-41a, H-41b, H-43, NH                                                                                            |
|                 | NH                   | 7.73, d (7.5)               |                                     | H-21                                          | 21, 22, 24             | H-21, H <sub>5</sub> -22, H-25, H <sub>5</sub> -26                                                                                                             |
|                 | 24                   |                             | 170.4, s                            |                                               |                        |                                                                                                                                                                |
|                 | 25                   | 5.351, m                    | 78.8, d                             | H <sub>5</sub> -26                            | 24, 27                 | H <sub>5</sub> -16, H <sub>5</sub> -26, NH (Ala)                                                                                                               |
|                 | 26                   | 3.77, m (2H)                | 37.6, t                             | H-25                                          | 24, 25, 27             | H-25, H-31/35, H-52/56, NH (Ala)                                                                                                                               |
|                 | 27                   |                             | 177.5, s                            |                                               |                        |                                                                                                                                                                |
|                 | 28                   | 3.91, dd (10.1, 3.2)        | 68.9, d                             | H-29a, H-29b                                  |                        | H-31/35, H <sub>5</sub> -36                                                                                                                                    |
|                 | 29a                  | 3.65, dd (-13.4, 10.1)      | 34.9, t                             | H-28, H-29b                                   | 27, 28, 30, 31/35      | H-31/35                                                                                                                                                        |
|                 | 29b                  | 3.48, dd (-13.4, 3.2)       |                                     | H-28, H-29a                                   | 28, 30, 31/35          | H-31/35, H <sub>5</sub> -36                                                                                                                                    |
| Pro             | 30                   |                             | 138.2, s                            |                                               |                        |                                                                                                                                                                |
|                 | 31/35                | 7.43, m                     | 129.8, d                            | H-32/34                                       | 29, 30, 33             | H-3, H-7, H <sub>5</sub> -16, H-21, H <sub>5</sub> -26, H-28, H-29a, H-29b, H <sub>5</sub> -36, H-38, H-43, H-44, H <sub>5</sub> -45, H <sub>5</sub> -47, H-49 |
|                 | 32/34                | 7.36, m                     | 127.1, d                            | H-31/35, H-33                                 |                        |                                                                                                                                                                |
|                 | 33                   | 7.43, m                     | 128.6, d                            | H-32/34                                       | 31/35                  |                                                                                                                                                                |
|                 | 36                   | 2.81, s                     | 39.3, q                             |                                               | 28, 37                 | H-28, H-29b, H-31/35, H-38                                                                                                                                     |
|                 | 37                   |                             | 172.9, s                            |                                               |                        |                                                                                                                                                                |
|                 | 38                   | 4.81, dd (8.4, 4.2)         | 57.0, d                             | H-39a, H-39b                                  | 37, 39, 40, 41         | H-31/35, H <sub>5</sub> -36, H-39a, H-39b, H52/56                                                                                                              |
|                 | 39a                  | 2.11, m                     | 27.4, t                             | H-38, H-39b, H-40a, H-40b                     | 37, 38, 41             | H-38                                                                                                                                                           |
|                 | 39b                  | 2.06, m                     |                                     | H-38, H-39a, H-40a, H-40b                     | 37, 40                 | H-38                                                                                                                                                           |
|                 | 40a                  | 2.18, m                     | 24.6, t                             | H-39a, H-39b, H-40a, H-41a, H-41b             | 38, 39, 41             | H-40b                                                                                                                                                          |
| N-Me-Val        | 40b                  | 1.93, m                     |                                     | H-39a, H-39b, H-40a, H-41a, H-41b             | 38, 39, 41             | H-40a                                                                                                                                                          |
|                 | 41a                  | 3.76, m                     | 47.4, t                             | H-40a, H-40b, H-41b                           | 39, 40                 | H <sub>5</sub> -22, H-43                                                                                                                                       |
|                 | 41b                  | 3.67, m                     |                                     | H-40a, H-40b, H-41a                           | 39, 40                 | H <sub>5</sub> -22, H <sub>5</sub> -36, H-43                                                                                                                   |
|                 | 42                   |                             | 168.1, s                            |                                               |                        |                                                                                                                                                                |
|                 | 43                   | 4.98, d (10.9)              | 60.0, d                             | H-44                                          | 42, 44, 45, 46, 47, 48 | H <sub>5</sub> -22, H-31/35, H-41a, H-41b, H-44, H <sub>5</sub> -45, H <sub>5</sub> -46, H-50a                                                                 |
|                 | 44                   | 2.47, dq (10.9, 6.6, 6.4)   | 27.1, d                             | H-43, H <sub>5</sub> -45, H <sub>5</sub> -46  | 43, 45, 46             | H-31/35, H-43, H <sub>5</sub> -45, H <sub>5</sub> -46, H <sub>5</sub> -47                                                                                      |
|                 | 45                   | 1.01, d (6.4)               | 19.2, q                             | H-44                                          | 43, 44, 46             | H <sub>5</sub> -16, H-31/35, H-43, H-44                                                                                                                        |
|                 | 46                   | 0.93, d (6.6)               | 17.9, q                             | H-44                                          | 43, 44, 45             | H-43, H-44, H <sub>5</sub> -47                                                                                                                                 |
|                 | 47                   | 3.20, s                     | 30.1, q                             |                                               | 43, 48                 | H-31/35, H <sub>5</sub> -46, H-49, H-54                                                                                                                        |
|                 | 48                   |                             | 171.0, s                            |                                               |                        |                                                                                                                                                                |
| Pla             | 49                   | 5.40, dd (9.9, 3.0)         | 72.0, d                             | H-50a, H-50b                                  | 1, 48, 50, 51          | H-31/35, H <sub>5</sub> -47, H-50a, H-50b, H-52/56                                                                                                             |
|                 | 50a                  | 3.17, dd (-14.3, 9.9)       | 37.0, t                             | H-49, H-50b                                   | 48, 49, 51, 52/56      | H-43, H-49, H-50b, H-52/56                                                                                                                                     |
|                 | 50b                  | 3.06, dd (-14.3, 2.7)       |                                     | H-49, H-50a                                   | 48, 51, 52/56          | H-49, H-50a, H-52/56                                                                                                                                           |
|                 | 51                   |                             | 135.7, s                            |                                               |                        |                                                                                                                                                                |
|                 | 52/56                | 7.27, m                     | 129.1, d                            | H-53/55                                       | 50, 54, 52/56          | H-3, H <sub>5</sub> -5, H <sub>5</sub> -26, H-38, H-49, H-50a, H-50b                                                                                           |
|                 | 53/55                | 7.36, m                     | 128.5, d                            | H-52/56, H-54                                 | 51, 53/55              |                                                                                                                                                                |
|                 | 54                   | 7.32, m                     | 126.8, d                            | H-52/56                                       |                        | H <sub>5</sub> -47                                                                                                                                             |

<sup>a</sup>Multiplicity derived from edited-HSQC. <sup>b</sup>Protons showing long-range correlation to indicated carbon. <sup>c</sup>OH signal assigned by default.

**Table S2.** Distance Constraints Used for Molecular Modeling of Grassypeptolide C (**3**)

| Atom 1 | Atom 2 | Constant | Lower (Å) | Upper (Å) | Pwr |
|--------|--------|----------|-----------|-----------|-----|
| H7A    | H1     | 2        | 3.5       | 5         | 2   |
| H1     | P9     | 2        | 3.5       | 5         | 2   |
| H1     | H43A   | 2        | 3.5       | 5         | 2   |
| H1     | P46    | 2        | 3.5       | 5         | 2   |
| H7A    | P14    | 2        | 3.5       | 5         | 2   |
| H7A    | P16    | 2        | 3.5       | 5         | 2   |
| H7A    | P46    | 2        | 3.5       | 5         | 2   |
| H8A    | P16    | 2        | 3.5       | 5         | 2   |
| H8A    | P46    | 2        | 3.5       | 5         | 2   |
| H11A   | H2     | 2        | 2.5       | 3.5       | 2   |
| H2     | P12    | 2        | 3.5       | 6         | 2   |
| H2     | P16    | 2        | 3.5       | 5         | 2   |
| H11A   | P16    | 2        | 3.5       | 5         | 2   |
| H11A   | P50    | 2        | 3.5       | 6         | 2   |
| P12    | P16    | 2        | 3.5       | 6         | 2   |
| H13A   | P16    | 2        | 3.5       | 5         | 2   |
| P14    | P16    | 2        | 3.5       | 5         | 2   |
| P15    | P16    | 2        | 3.5       | 5         | 2   |
| H18A   | P9     | 2        | 3.5       | 5         | 2   |
| H18A   | H13A   | 2        | 3.5       | 5         | 2   |
| H18A   | P15    | 2        | 3.5       | 5         | 2   |
| H18A   | P16    | 2        | 3.5       | 5         | 2   |
| H21A   | H18A   | 2        | 3.5       | 5         | 2   |
| H21A   | P16    | 2        | 3.5       | 5         | 2   |
| P9     | P22    | 2        | 3.5       | 6         | 2   |
| H25A   | H5     | 2        | 3.5       | 5         | 2   |
| H25A   | H21A   | 2        | 3.5       | 5         | 2   |
| H28A   | P36    | 2        | 3.5       | 5         | 2   |
| P3135  | P36    | 2        | 3.5       | 5         | 2   |
| H38A   | P3135  | 2        | 3.5       | 5         | 2   |
| H44A   | P3135  | 2        | 3.5       | 5         | 2   |
| P3135  | P45    | 2        | 3.5       | 5         | 2   |
| P36    | P39    | 2        | 3.5       | 6         | 2   |
| H38A   | P36    | 2        | 3.5       | 5         | 2   |
| P36    | P41    | 2        | 3.5       | 6         | 2   |
| H43A   | P22    | 2        | 3.5       | 6         | 2   |
| H43A   | P41    | 2        | 2.5       | 4.5       | 2   |
| H43A   | P47    | 2        | 3.5       | 5         | 2   |
| H43A   | P50    | 2        | 3.5       | 6         | 2   |
| H44A   | P47    | 2        | 3.5       | 5         | 2   |
| P46    | P47    | 2        | 3.5       | 5         | 2   |
| H49A   | H43A   | 2        | 3.5       | 5         | 2   |
| H49A   | P46    | 2        | 3.5       | 5         | 2   |
| P15    | P50    | 2        | 3.5       | 6         | 2   |
| P40    | P50    | 2        | 3.5       | 7         | 2   |
| H11A   | P5     | 2        | 3.5       | 5         | 2   |
| P22    | P19    | 2        | 3.5       | 7         | 2   |
| H5     | H28A   | 2        | 3.5       | 5         | 2   |
| H28A   | H38A   | 2        | 3.5       | 5         | 2   |
| H49A   | P47    | 2        | 2.5       | 3.5       | 2   |

**Table S3.** Angle Constraints Used in Molecular Modeling of Grassypeptolide C (3)

| Atom 1 | Atom 2 | Atom 3 | Atom 4 | Const | Value (°) | Pwr |
|--------|--------|--------|--------|-------|-----------|-----|
| H1     | N1     | C3     | H3A    | 0.005 | 180       | 2   |
| H2     | N2     | C7     | H7A    | 0.005 | 180       | 2   |
| H5     | N5     | C21    | H21A   | 0.005 | 180       | 2   |
| H1     | N1     | C6     | O3     | 2     | 180       | 2   |
| H2     | N2     | C10    | O5     | 2     | 180       | 2   |
| C16    | N3     | C17    | O6     | 2     | 180       | 2   |
| H5     | N5     | C24    | O7     | 2     | 180       | 2   |
| C36    | N7     | C37    | O8     | 2     | 0         | 2   |
| C41    | N8     | C42    | O9     | 2     | 180       | 2   |
| C47    | N9     | C48    | O10    | 2     | 180       | 2   |

**Table S4.** Energies and Constraint Violations<sup>a</sup> of Grassypeptolide C (**3**) Molecular Models

| Struc 1 <sup>b</sup>  |        |           |               |
|-----------------------|--------|-----------|---------------|
| Energy 60.12 kcal/mol |        |           |               |
| Atom 1                | Atom 2 | Range (Å) | Violation (Å) |
| H7A                   | P14    | 3.5-5     | 1.715         |
| H7A                   | P16    | 3.5-5     | 1.053         |
| H8A                   | P46    | 3.5-5     | 2.453         |
| H18A                  | P15    | 3.5-5     | 1.141         |
| H21A                  | P16    | 3.5-5     | 2.249         |
| H43A                  | P22    | 3.5-6     | 1.182         |
| P15                   | P50    | 3.5-6     | 1.61          |
| H11A                  | P5     | 3.5-5     | 2.133         |

  

| Struc 2               |        |           |               |
|-----------------------|--------|-----------|---------------|
| Energy 62.76 kcal/mol |        |           |               |
| Atom 1                | Atom 2 | Range (Å) | Violation (Å) |
| H1                    | P46    | 3.5-5     | 1.14          |
| H7A                   | P14    | 3.5-5     | 2.537         |
| H8A                   | P46    | 3.5-5     | 1.817         |
| H18A                  | P9     | 3.5-5     | 1.768         |
| H21A                  | P16    | 3.5-5     | 2.363         |
| P15                   | P50    | 3.5-6     | 1.091         |
| H11A                  | P5     | 3.5-5     | 2.286         |

  

| Struc 3               |        |           |               |
|-----------------------|--------|-----------|---------------|
| Energy 38.46 kcal/mol |        |           |               |
| Atom 1                | Atom 2 | Range (Å) | Violation (Å) |
| P14                   | P16    | 3.5-5     | 1.11          |
| P15                   | P16    | 3.5-5     | 1.111         |
| H18A                  | P9     | 3.5-5     | 1.012         |
| H18A                  | H13A   | 3.5-5     | 1.139         |
| H18A                  | P15    | 3.5-5     | 1.257         |
| H44A                  | P3135  | 3.5-5     | 1.012         |

  

| Struc 4               |        |           |               |
|-----------------------|--------|-----------|---------------|
| Energy 37.82 kcal/mol |        |           |               |
| Atom 1                | Atom 2 | Range (Å) | Violation (Å) |
| H7A                   | P14    | 3.5-5     | 2.157         |
| H18A                  | H13A   | 3.5-5     | 1.57          |

  

| Struc 5               |        |           |               |
|-----------------------|--------|-----------|---------------|
| Energy 60.65 kcal/mol |        |           |               |
| Atom 1                | Atom 2 | Range (Å) | Violation (Å) |
| H7A                   | H1     | 3.5-5     | 1.116         |
| H43A                  | H1     | 3.5-5     | 1.062         |
| H7A                   | P14    | 3.5-5     | 2.558         |
| H7A                   | P16    | 3.5-5     | 1.14          |
| H18A                  | P15    | 3.5-5     | 1.17          |
| H21A                  | P16    | 3.5-5     | 1.125         |
| P9                    | P22    | 3.5-6     | 1.415         |
| H44A                  | P3135  | 3.5-5     | 1.552         |
| H11A                  | P5     | 3.5-5     | 1.865         |

  

| Struc 6               |        |           |               |
|-----------------------|--------|-----------|---------------|
| Energy 33.93 kcal/mol |        |           |               |
| Atom 1                | Atom 2 | Range (Å) | Violation (Å) |
| H7A                   | P14    | 3.5-5     | 2.575         |

  

| Struc 7               |        |           |               |
|-----------------------|--------|-----------|---------------|
| Energy 37.01 kcal/mol |        |           |               |
| Atom 1                | Atom 2 | Range (Å) | Violation (Å) |
| P15                   | P16    | 3.5-5     | 1.126         |
| H18A                  | P9     | 3.5-5     | 1.001         |
| H18A                  | P15    | 3.5-5     | 1.098         |
| H44A                  | P3135  | 3.5-5     | 1.067         |

  

| Struc 8               |        |           |               |
|-----------------------|--------|-----------|---------------|
| Energy 32.67 kcal/mol |        |           |               |
| Atom 1                | Atom 2 | Range (Å) | Violation (Å) |
| H18A                  | P9     | 3.5-5     | 1.037         |

  

| Struc 9               |        |           |               |
|-----------------------|--------|-----------|---------------|
| Energy 30.62 kcal/mol |        |           |               |
| Atom 1                | Atom 2 | Range (Å) | Violation (Å) |
| H18A                  | P9     | 3.5-5     | 1.319         |

  

| Struc 10              |        |           |               |
|-----------------------|--------|-----------|---------------|
| Energy 35.22 kcal/mol |        |           |               |
| Atom 1                | Atom 2 | Range (Å) | Violation (Å) |
| H7A                   | P14    | 3.5-5     | 2.057         |

<sup>a</sup>Only violations of > 1 Å to the upper bound of constraints are shown. <sup>b</sup>Members of the higher energy conformational family are shown in red, while members of the lower energy conformational family are shown in blue.

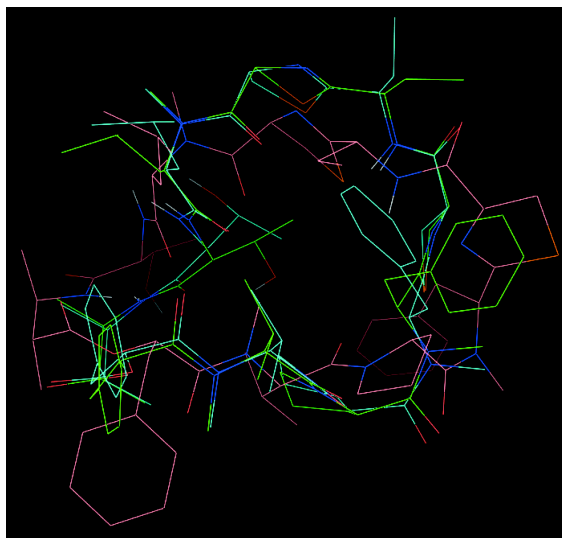

**Figure S1.** Higher-energy conformational family of grassypeptolide C (**3**) molecular models.

**Table S5.** Atom coordinates for modeled grassypeptolide C (**3**) structure 1

| Atom number | Atom name <sup>a,b</sup> | x       | y       | z       | Atom type <sup>c</sup> | Charge <sup>d</sup> |
|-------------|--------------------------|---------|---------|---------|------------------------|---------------------|
| 1           | C11                      | -1.391  | 1.4867  | -3.2106 | C.3                    | 0.1336              |
| 2           | C10                      | -0.4116 | 0.9916  | -2.19   | C.2                    | 0.2042              |
| 3           | N2                       | 0.8906  | 1.28    | -2.4053 | N.am                   | -0.2613             |
| 4           | O5                       | -0.8124 | 0.3228  | -1.2526 | O.2                    | -0.3944             |
| 5           | N3                       | -1.5557 | 2.9248  | -2.9873 | N.am                   | -0.2542             |
| 6           | C12                      | -2.7346 | 0.7089  | -3.1896 | C.3                    | -0.0099             |
| 7           | C13                      | -3.6585 | 1.0191  | -4.401  | C.3                    | -0.0425             |
| 8           | C14                      | -3.0272 | 0.5708  | -5.7514 | C.3                    | -0.0625             |
| 9           | C15                      | -5.0062 | 0.2777  | -4.1921 | C.3                    | -0.0625             |
| 10          | C7                       | 1.9099  | 0.6884  | -1.5572 | C.3                    | 0.1563              |
| 11          | C6                       | 3.0143  | 0.175   | -2.45   | C.2                    | 0.2046              |
| 12          | N1                       | 2.6439  | -0.6933 | -3.4218 | N.am                   | -0.2796             |
| 13          | C8                       | 2.344   | 1.7204  | -0.4859 | C.3                    | 0.0924              |
| 14          | C9                       | 1.1835  | 2.0526  | 0.4848  | C.3                    | -0.0346             |
| 15          | O4                       | 3.4398  | 1.2294  | 0.3077  | O.3                    | -0.3874             |
| 16          | O3                       | 4.1588  | 0.5626  | -2.2769 | O.2                    | -0.3944             |
| 17          | C3                       | 3.6121  | -1.2448 | -4.3719 | C.3                    | 0.0598              |
| 18          | C16                      | -1.2848 | 3.8764  | -4.0621 | C.3                    | 0.0254              |
| 19          | C17                      | -1.8942 | 3.3438  | -1.7327 | C.2                    | 0.1909              |
| 20          | C18                      | -2.0315 | 4.7949  | -1.3271 | C.3                    | 0.1002              |
| 21          | O6                       | -2.1193 | 2.5424  | -0.8389 | O.2                    | -0.3959             |
| 22          | C4                       | 3.1454  | -0.8824 | -5.8067 | C.3                    | -0.0395             |
| 23          | C2                       | 3.737   | -2.7837 | -4.1718 | C.3                    | 0.08                |
| 24          | C1                       | 2.3803  | -3.4286 | -4.3133 | C.2                    | 0.2415              |
| 25          | C5                       | 4.3258  | -3.0803 | -2.7667 | C.3                    | -0.0418             |
| 26          | O1                       | 1.6279  | -3.3278 | -3.2123 | O.3                    | -0.2498             |
| 27          | O2                       | 2.0218  | -3.9612 | -5.3516 | O.2                    | -0.3699             |
| 28          | C49                      | 0.2103  | -3.4902 | -3.3902 | C.3                    | 0.1852              |
| 29          | C48                      | -0.3492 | -2.9799 | -2.0793 | C.2                    | 0.2166              |
| 30          | N9                       | -0.2715 | -3.5935 | -0.863  | N.am                   | -0.252              |
| 31          | O10                      | -0.8669 | -1.8846 | -2.183  | O.2                    | -0.3933             |
| 32          | C50                      | -0.3163 | -4.8634 | -3.8932 | C.3                    | 0.0292              |
| 33          | C51                      | -1.8059 | -5.085  | -3.5788 | C.ar                   | -0.0379             |
| 34          | C56                      | -2.2483 | -6.3207 | -3.0895 | C.ar                   | -0.0601             |
| 35          | C55                      | -3.592  | -6.5148 | -2.7561 | C.ar                   | -0.0686             |
| 36          | C54                      | -4.5105 | -5.4749 | -2.9198 | C.ar                   | -0.0687             |
| 37          | C53                      | -4.0843 | -4.2501 | -3.4388 | C.ar                   | -0.0686             |
| 38          | C52                      | -2.7423 | -4.0636 | -3.7827 | C.ar                   | -0.0601             |
| 39          | C43                      | -0.8145 | -2.8767 | 0.31    | C.3                    | 0.1359              |
| 40          | C47                      | 0.3554  | -4.9125 | -0.7578 | C.3                    | 0.0255              |
| 41          | C42                      | -0.1295 | -3.23   | 1.6242  | C.2                    | 0.2068              |
| 42          | C44                      | -2.3738 | -2.9968 | 0.4277  | C.3                    | -0.0061             |
| 43          | C46                      | -3.1531 | -2.0422 | -0.5223 | C.3                    | -0.0584             |
| 44          | C45                      | -2.8421 | -4.4604 | 0.2351  | C.3                    | -0.0584             |
| 45          | N4                       | -2.4653 | 4.8053  | 0.052   | N.2                    | -0.3321             |
| 46          | C20                      | -1.4658 | 4.9759  | 0.8185  | C.2                    | 0.1014              |

**Table S5. Continued**

|    |      |         |         |         |      |         |
|----|------|---------|---------|---------|------|---------|
| 47 | S1   | 0.1511  | 5.2564  | 0.1632  | S.3  | -0.0465 |
| 48 | C19  | -0.7163 | 5.6227  | -1.3807 | C.3  | 0.043   |
| 49 | C21  | -1.6692 | 4.9511  | 2.3088  | C.3  | 0.1158  |
| 50 | N5   | -0.7944 | 3.9596  | 2.9372  | N.am | -0.2623 |
| 51 | C22  | -3.1336 | 4.5889  | 2.6854  | C.3  | -0.013  |
| 52 | C23  | -3.3924 | 4.7362  | 4.2083  | C.3  | -0.0602 |
| 53 | C24  | -0.1097 | 4.2335  | 4.0745  | C.2  | 0.1895  |
| 54 | C25  | 0.5631  | 3.0775  | 4.7783  | C.3  | 0.1001  |
| 55 | O7   | -0.0347 | 5.3478  | 4.5672  | O.2  | -0.396  |
| 56 | N6   | -0.0594 | 1.8557  | 4.3257  | N.2  | -0.332  |
| 57 | C27  | 0.8072  | 0.9329  | 4.2252  | C.2  | 0.1037  |
| 58 | S2   | 2.4944  | 1.2362  | 4.6706  | S.3  | -0.0463 |
| 59 | C26  | 2.0854  | 2.9964  | 4.499   | C.3  | 0.043   |
| 60 | C28  | 0.3758  | -0.4179 | 3.7067  | C.3  | 0.128   |
| 61 | N7   | 0.5433  | -1.4562 | 4.7301  | N.am | -0.2484 |
| 62 | C29  | -1.0624 | -0.3488 | 3.1117  | C.3  | 0.0238  |
| 63 | C30  | -2.185  | -0.411  | 4.1553  | C.ar | -0.0376 |
| 64 | C31  | -2.5815 | -1.6387 | 4.6999  | C.ar | -0.06   |
| 65 | C32  | -3.5588 | -1.6854 | 5.6985  | C.ar | -0.0686 |
| 66 | C33  | -4.1704 | -0.5073 | 6.1359  | C.ar | -0.0687 |
| 67 | C34  | -3.8115 | 0.7159  | 5.5634  | C.ar | -0.0686 |
| 68 | C35  | -2.8361 | 0.7571  | 4.5635  | C.ar | -0.06   |
| 69 | C37  | 1.1191  | -2.6734 | 4.4709  | C.2  | 0.2073  |
| 70 | C38  | 1.7517  | -3.1847 | 3.178   | C.3  | 0.134   |
| 71 | C36  | 0.0844  | -1.2197 | 6.1025  | C.3  | 0.0266  |
| 72 | O8   | 1.2125  | -3.4759 | 5.3878  | O.2  | -0.3941 |
| 73 | C39  | 3.18    | -2.6121 | 2.9859  | C.3  | -0.0104 |
| 74 | C40  | 3.399   | -2.679  | 1.4561  | C.3  | -0.0281 |
| 75 | C41  | 2.0241  | -2.2627 | 0.8871  | C.3  | 0.0369  |
| 76 | N8   | 1.1638  | -2.9029 | 1.8738  | N.am | -0.2498 |
| 77 | O9   | -0.7914 | -3.7662 | 2.4987  | O.2  | -0.3942 |
| 78 | H11A | -0.8738 | 1.2396  | -4.1521 | H    | 0.0802  |
| 79 | H2   | 1.1998  | 1.8335  | -3.183  | H    | 0.1884  |
| 80 | H12B | -2.5272 | -0.3708 | -3.2043 | H    | 0.0315  |
| 81 | H12A | -3.2716 | 0.9308  | -2.2559 | H    | 0.0315  |
| 82 | H13A | -3.8634 | 2.103   | -4.4357 | H    | 0.0298  |
| 83 | H14C | -2.6969 | -0.4781 | -5.6893 | H    | 0.0232  |
| 84 | H14A | -3.7646 | 0.6561  | -6.5625 | H    | 0.0232  |
| 85 | H14B | -2.1657 | 1.1924  | -6.0323 | H    | 0.0232  |
| 86 | H15B | -5.4772 | 0.5946  | -3.2487 | H    | 0.0232  |
| 87 | H15C | -4.835  | -0.8091 | -4.1539 | H    | 0.0232  |
| 88 | H15A | -5.6988 | 0.5003  | -5.017  | H    | 0.0232  |
| 89 | H7A  | 1.4806  | -0.1624 | -1.0224 | H    | 0.0826  |
| 90 | H1   | 1.6849  | -0.9747 | -3.5132 | H    | 0.1856  |
| 91 | H8A  | 2.6143  | 2.6462  | -1.0131 | H    | 0.0639  |
| 92 | H9A  | 0.3219  | 2.4604  | -0.0576 | H    | 0.0257  |
| 93 | H9C  | 0.8626  | 1.1539  | 1.0283  | H    | 0.0257  |



**Table S5. Continued**

|     |      |         |         |         |   |        |
|-----|------|---------|---------|---------|---|--------|
| 94  | H9B  | 1.5183  | 2.802   | 1.2151  | H | 0.0257 |
| 95  | H4   | 4.2166  | 1.0445  | -0.2095 | H | 0.2101 |
| 96  | H3A  | 4.6178  | -0.8115 | -4.2339 | H | 0.0582 |
| 97  | H16B | -0.1961 | 4.0062  | -4.151  | H | 0.0488 |
| 98  | H16C | -1.7569 | 4.8576  | -3.9261 | H | 0.0488 |
| 99  | H16A | -1.6588 | 3.4717  | -5.0111 | H | 0.0488 |
| 100 | H18A | -2.8446 | 5.247   | -1.9138 | H | 0.0619 |
| 101 | H4C  | 2.1479  | -1.2987 | -6.0139 | H | 0.0253 |
| 102 | H4A  | 3.8529  | -1.2701 | -6.5559 | H | 0.0253 |
| 103 | H4B  | 3.0902  | 0.2127  | -5.9083 | H | 0.0253 |
| 104 | H2A  | 4.4167  | -3.2039 | -4.9328 | H | 0.0574 |
| 105 | H5B  | 4.3618  | -4.1665 | -2.597  | H | 0.0258 |
| 106 | H5A  | 3.7108  | -2.6213 | -1.9771 | H | 0.0258 |
| 107 | H5C  | 5.3441  | -2.6713 | -2.6873 | H | 0.0258 |
| 108 | H49A | -0.0742 | -2.7595 | -4.1673 | H | 0.0918 |
| 109 | H50B | 0.3091  | -5.6595 | -3.4715 | H | 0.048  |
| 110 | H50A | -0.2366 | -4.9266 | -4.9898 | H | 0.048  |
| 111 | H56A | -1.5502 | -7.142  | -2.9642 | H | 0.0557 |
| 112 | H55A | -3.9231 | -7.473  | -2.3676 | H | 0.0599 |
| 113 | H54A | -5.5508 | -5.6177 | -2.6455 | H | 0.0559 |
| 114 | H53A | -4.7972 | -3.4427 | -3.5745 | H | 0.0599 |
| 115 | H52A | -2.4413 | -3.1147 | -4.2121 | H | 0.0557 |
| 116 | H43A | -0.5903 | -1.7999 | 0.2273  | H | 0.0805 |
| 117 | H47B | -0.315  | -5.678  | -1.1676 | H | 0.0488 |
| 118 | H47C | 1.3146  | -4.9401 | -1.2945 | H | 0.0488 |
| 119 | H47A | 0.5626  | -5.1986 | 0.2814  | H | 0.0488 |
| 120 | H44A | -2.6936 | -2.6888 | 1.4374  | H | 0.0343 |
| 121 | H46A | -2.7784 | -1.0108 | -0.434  | H | 0.0234 |
| 122 | H46C | -3.0804 | -2.3647 | -1.5676 | H | 0.0234 |
| 123 | H46B | -4.2206 | -2.0291 | -0.26   | H | 0.0234 |
| 124 | H45B | -2.6394 | -4.7775 | -0.7946 | H | 0.0234 |
| 125 | H45A | -3.9241 | -4.5449 | 0.4211  | H | 0.0234 |
| 126 | H45C | -2.3142 | -5.1351 | 0.9252  | H | 0.0234 |
| 127 | H19A | -0.0543 | 5.4087  | -2.2283 | H | 0.0448 |
| 128 | H19B | -0.955  | 6.6981  | -1.3742 | H | 0.0448 |
| 129 | H21A | -1.4633 | 5.9788  | 2.6371  | H | 0.0854 |
| 130 | H5   | -0.8199 | 3.0244  | 2.5808  | H | 0.1896 |
| 131 | H22B | -3.3402 | 3.5515  | 2.3711  | H | 0.032  |
| 132 | H22A | -3.8324 | 5.2532  | 2.1514  | H | 0.032  |
| 133 | H23A | -4.4383 | 4.4783  | 4.4375  | H | 0.0233 |
| 134 | H23B | -3.2099 | 5.7739  | 4.5279  | H | 0.0233 |
| 135 | H23C | -2.7384 | 4.0723  | 4.7917  | H | 0.0233 |
| 136 | H25A | 0.3748  | 3.1445  | 5.8627  | H | 0.0619 |
| 137 | H26A | 2.6742  | 3.6201  | 5.1891  | H | 0.0448 |
| 138 | H26B | 2.3092  | 3.293   | 3.4644  | H | 0.0448 |
| 139 | H28A | 1.0681  | -0.5746 | 2.8816  | H | 0.088  |
| 140 | H29A | -1.1783 | 0.5323  | 2.4622  | H | 0.0485 |

**Table S5.** Continued

|     |       |         |         |         |    |        |
|-----|-------|---------|---------|---------|----|--------|
| 141 | H29B  | -1.2264 | -1.2068 | 2.4693  | H  | 0.0485 |
| 142 | H31A  | -2.1309 | -2.564  | 4.3532  | H  | 0.0557 |
| 143 | H32A  | -3.8426 | -2.6378 | 6.1358  | H  | 0.0599 |
| 144 | H33A  | -4.9239 | -0.5429 | 6.9169  | H  | 0.0559 |
| 145 | H34A  | -4.2902 | 1.633   | 5.893   | H  | 0.0599 |
| 146 | H35A  | -2.5877 | 1.7015  | 4.098   | H  | 0.0557 |
| 147 | H38A  | 1.8234  | -4.2843 | 3.2246  | H  | 0.0802 |
| 148 | H36C  | -0.4715 | -0.2761 | 6.2014  | H  | 0.0489 |
| 149 | H36A  | -0.5651 | -2.0347 | 6.4557  | H  | 0.0489 |
| 150 | H36B  | 0.9621  | -1.16   | 6.7638  | H  | 0.0489 |
| 151 | H39B  | 3.9425  | -3.1744 | 3.5493  | H  | 0.0313 |
| 152 | H39A  | 3.2208  | -1.5588 | 3.3057  | H  | 0.0313 |
| 153 | H40A  | 3.611   | -3.7221 | 1.1663  | H  | 0.0287 |
| 154 | H40B  | 4.223   | -2.036  | 1.1047  | H  | 0.0287 |
| 155 | H41B  | 1.9368  | -1.1737 | 0.9249  | H  | 0.0524 |
| 156 | H41A  | 1.9009  | -2.6165 | -0.1456 | H  | 0.0524 |
| 157 | P5    | 4.4722  | -3.153  | -2.4205 | Du | 0      |
| 158 | P4    | 3.0303  | -0.7854 | -6.1594 | Du | 0      |
| 159 | P9    | 0.9009  | 2.1388  | 0.7286  | Du | 0      |
| 160 | P12   | -2.8994 | 0.28    | -2.7301 | Du | 0      |
| 161 | P14   | -2.8758 | 0.4568  | -6.0947 | Du | 0      |
| 162 | P15   | -5.337  | 0.0953  | -4.1399 | Du | 0      |
| 163 | P16   | -1.204  | 4.1119  | -4.3628 | Du | 0      |
| 164 | P22   | -3.5863 | 4.4023  | 2.2612  | Du | 0      |
| 165 | P23   | -3.4622 | 4.7748  | 4.5857  | Du | 0      |
| 166 | P29   | -1.2023 | -0.3372 | 2.4657  | Du | 0      |
| 167 | P3135 | -2.3593 | -0.4312 | 4.2256  | Du | 0      |
| 168 | P36   | -0.0248 | -1.1569 | 6.4736  | Du | 0      |
| 169 | P39   | 3.5817  | -2.3666 | 3.4275  | Du | 0      |
| 170 | P40   | 3.917   | -2.8791 | 1.1355  | Du | 0      |
| 171 | P41   | 1.9189  | -1.8951 | 0.3897  | Du | 0      |
| 172 | P46   | -3.3598 | -1.8016 | -0.7539 | Du | 0      |
| 173 | P45   | -2.9593 | -4.8192 | 0.1839  | Du | 0      |
| 174 | P47   | 0.5207  | -5.2722 | -0.7269 | Du | 0      |
| 175 | P50   | 0.0363  | -5.2931 | -4.2306 | Du | 0      |
| 176 | P19   | -0.5046 | 6.0534  | -1.8013 | Du | 0      |

<sup>a</sup>Atom nomenclature as in Figure 1a. <sup>b</sup>Pseudoatoms used in modeling are designated by “P” followed by the number of the relevant carbon atom(s). <sup>c</sup>Tripos forcefield atom type. <sup>d</sup>Gasteiger-Huckel charges.

**Table S6.** Atom coordinates for modeled grassypeptolide C (**3**) structure 2

| Atom number | Atom name <sup>a,b</sup> | x       | y       | z       | Atom type <sup>c</sup> | Charge <sup>d</sup> |
|-------------|--------------------------|---------|---------|---------|------------------------|---------------------|
| 1           | N2                       | -0.3831 | -2.485  | -1.7662 | N.am                   | -0.2613             |
| 2           | C7                       | -1.7327 | -1.9583 | -1.681  | C.3                    | 0.1563              |
| 3           | C6                       | -2.3187 | -1.8701 | -3.0673 | C.2                    | 0.2046              |
| 4           | N1                       | -1.5124 | -1.3071 | -4.0001 | N.am                   | -0.2796             |
| 5           | C3                       | -1.8924 | -1.2228 | -5.411  | C.3                    | 0.0598              |
| 6           | C8                       | -2.4565 | -2.8475 | -0.6357 | C.3                    | 0.0924              |
| 7           | H8A                      | -1.7274 | -3.0274 | 0.1732  | H                      | 0.0639              |
| 8           | C9                       | -3.6625 | -2.1426 | 0.0273  | C.3                    | -0.0346             |
| 9           | O3                       | -3.4403 | -2.2982 | -3.2872 | O.2                    | -0.3944             |
| 10          | H1                       | -0.6009 | -0.9753 | -3.7448 | H                      | 0.1856              |
| 11          | C2                       | -1.7415 | 0.2421  | -5.9176 | C.3                    | 0.08                |
| 12          | C1                       | -0.3357 | 0.7312  | -5.6616 | C.2                    | 0.2415              |
| 13          | C4                       | -0.9845 | -2.2005 | -6.2033 | C.3                    | -0.0395             |
| 14          | C5                       | -2.7635 | 1.1465  | -5.1806 | C.3                    | -0.0418             |
| 15          | O1                       | -0.1527 | 1.2073  | -4.4229 | O.3                    | -0.2498             |
| 16          | O2                       | 0.5329  | 0.6627  | -6.5163 | O.2                    | -0.3699             |
| 17          | C49                      | 1.2017  | 1.2668  | -3.94   | C.3                    | 0.1852              |
| 18          | C48                      | 1.0767  | 1.5709  | -2.4572 | C.2                    | 0.2166              |
| 19          | C50                      | 2.2395  | 2.1334  | -4.7056 | C.3                    | 0.0292              |
| 20          | C51                      | 3.4997  | 2.3252  | -3.8461 | C.ar                   | -0.0379             |
| 21          | C52                      | 3.9336  | 3.6044  | -3.4798 | C.ar                   | -0.0601             |
| 22          | C53                      | 5.0348  | 3.7633  | -2.6335 | C.ar                   | -0.0686             |
| 23          | C54                      | 5.7333  | 2.6439  | -2.1739 | C.ar                   | -0.0687             |
| 24          | C55                      | 5.3392  | 1.3664  | -2.58   | C.ar                   | -0.0686             |
| 25          | C56                      | 4.2317  | 1.2103  | -3.4182 | C.ar                   | -0.0601             |
| 26          | H50B                     | 2.5772  | 1.6322  | -5.626  | H                      | 0.048               |
| 27          | H50A                     | 1.7907  | 3.0873  | -5.0059 | H                      | 0.048               |
| 28          | N9                       | 0.5161  | 2.6851  | -1.8977 | N.am                   | -0.252              |
| 29          | O10                      | 1.4872  | 0.6712  | -1.749  | O.2                    | -0.3933             |
| 30          | C43                      | 0.3576  | 2.7304  | -0.4256 | C.3                    | 0.1359              |
| 31          | C47                      | 0.0271  | 3.7607  | -2.7657 | C.3                    | 0.0255              |
| 32          | C42                      | -0.881  | 3.5068  | -0.0009 | C.2                    | 0.2068              |
| 33          | C44                      | 1.6539  | 3.213   | 0.2984  | C.3                    | -0.0061             |
| 34          | C45                      | 2.2117  | 4.5304  | -0.3019 | C.3                    | -0.0584             |
| 35          | C46                      | 2.7579  | 2.1166  | 0.31    | C.3                    | -0.0584             |
| 36          | H44A                     | 1.4023  | 3.4097  | 1.3532  | H                      | 0.0343              |
| 37          | N8                       | -2.1233 | 3.0281  | -0.2703 | N.am                   | -0.2498             |
| 38          | O9                       | -0.7451 | 4.5672  | 0.5875  | O.2                    | -0.3942             |
| 39          | C38                      | -3.3182 | 3.7803  | 0.0973  | C.3                    | 0.134               |
| 40          | C39                      | -4.4218 | 2.7893  | -0.3559 | C.3                    | -0.0104             |
| 41          | C40                      | -3.7648 | 1.9985  | -1.5059 | C.3                    | -0.0281             |
| 42          | C41                      | -2.337  | 1.7692  | -0.9689 | C.3                    | 0.0369              |
| 43          | C37                      | -3.6558 | 4.2182  | 1.5161  | C.2                    | 0.2073              |
| 44          | N7                       | -3.368  | 3.5976  | 2.7007  | N.am                   | -0.2484             |
| 45          | H41A                     | -2.3332 | 0.959   | -0.2281 | H                      | 0.0524              |
| 46          | H41B                     | -1.6475 | 1.5445  | -1.7928 | H                      | 0.0524              |

**Table S6. Continued**

|    |      |         |         |         |      |         |
|----|------|---------|---------|---------|------|---------|
| 47 | H40A | -4.2876 | 1.0591  | -1.7509 | H    | 0.0287  |
| 48 | H40B | -3.7277 | 2.6392  | -2.403  | H    | 0.0287  |
| 49 | H39B | -4.6491 | 2.0809  | 0.4567  | H    | 0.0313  |
| 50 | H39A | -5.3555 | 3.2919  | -0.6572 | H    | 0.0313  |
| 51 | O8   | -4.3318 | 5.236   | 1.5383  | O.2  | -0.3941 |
| 52 | C28  | -2.4464 | 2.4588  | 2.8013  | C.3  | 0.128   |
| 53 | C27  | -3.1283 | 1.3052  | 3.4962  | C.2  | 0.1037  |
| 54 | C36  | -3.9041 | 4.2154  | 3.9178  | C.3  | 0.0266  |
| 55 | C29  | -1.1938 | 3.0048  | 3.5441  | C.3  | 0.0238  |
| 56 | C30  | 0.0971  | 2.1734  | 3.5273  | C.ar | -0.0376 |
| 57 | C35  | 1.2287  | 2.7513  | 4.1163  | C.ar | -0.06   |
| 58 | C34  | 2.4444  | 2.0651  | 4.1684  | C.ar | -0.0686 |
| 59 | C33  | 2.5308  | 0.7719  | 3.6512  | C.ar | -0.0687 |
| 60 | C32  | 1.4036  | 0.1889  | 3.0683  | C.ar | -0.0686 |
| 61 | C31  | 0.2021  | 0.8951  | 2.9664  | C.ar | -0.06   |
| 62 | H29B | -1.4384 | 3.1791  | 4.6025  | H    | 0.0485  |
| 63 | H29A | -0.9379 | 3.9758  | 3.0923  | H    | 0.0485  |
| 64 | S2   | -4.8217 | 0.9499  | 3.1077  | S.3  | -0.0463 |
| 65 | C26  | -4.5005 | -0.6805 | 3.8233  | C.3  | 0.043   |
| 66 | C25  | -3.3997 | -0.4157 | 4.878   | C.3  | 0.1001  |
| 67 | N6   | -2.5043 | 0.5908  | 4.345   | N.2  | -0.332  |
| 68 | C24  | -2.6916 | -1.7052 | 5.2229  | C.2  | 0.1895  |
| 69 | N5   | -1.6778 | -2.1167 | 4.4268  | N.am | -0.2623 |
| 70 | O7   | -3.0696 | -2.3311 | 6.2008  | O.2  | -0.396  |
| 71 | H26A | -5.4087 | -1.1252 | 4.2581  | H    | 0.0448  |
| 72 | H26B | -4.119  | -1.3328 | 3.0236  | H    | 0.0448  |
| 73 | C21  | -0.8702 | -3.2886 | 4.7736  | C.3  | 0.1158  |
| 74 | C20  | -0.603  | -4.085  | 3.5276  | C.2  | 0.1014  |
| 75 | C22  | 0.4167  | -2.7402 | 5.4485  | C.3  | -0.013  |
| 76 | C23  | 1.2177  | -3.8318 | 6.2075  | C.3  | -0.0602 |
| 77 | S1   | -1.9498 | -4.5199 | 2.4662  | S.3  | -0.0465 |
| 78 | C19  | -0.7621 | -5.5798 | 1.5983  | C.3  | 0.043   |
| 79 | C18  | 0.6297  | -4.9693 | 1.9094  | C.3  | 0.1002  |
| 80 | N4   | 0.5895  | -4.4159 | 3.242   | N.2  | -0.3321 |
| 81 | C17  | 0.9677  | -3.7973 | 1.0155  | C.2  | 0.1909  |
| 82 | C10  | 0.5778  | -1.9411 | -0.9912 | C.2  | 0.2042  |
| 83 | C11  | 1.8834  | -2.6726 | -0.9424 | C.3  | 0.1336  |
| 84 | O5   | 0.4223  | -0.935  | -0.3164 | O.2  | -0.3944 |
| 85 | N3   | 1.6033  | -3.9048 | -0.1873 | N.am | -0.2542 |
| 86 | H2   | -0.2239 | -3.3124 | -2.31   | H    | 0.1884  |
| 87 | C12  | 2.9919  | -1.8097 | -0.2841 | C.3  | -0.0099 |
| 88 | C13  | 4.3451  | -2.5431 | -0.0975 | C.3  | -0.0425 |
| 89 | C15  | 4.9704  | -2.9455 | -1.4608 | C.3  | -0.0625 |
| 90 | C14  | 5.3013  | -1.5985 | 0.6782  | C.3  | -0.0625 |
| 91 | H12A | 3.1663  | -0.9116 | -0.8957 | H    | 0.0315  |
| 92 | H12B | 2.6507  | -1.4801 | 0.7058  | H    | 0.0315  |
| 93 | H13A | 4.1917  | -3.4491 | 0.5134  | H    | 0.0298  |

**Table S6. Continued**

|     |      |         |         |         |     |         |
|-----|------|---------|---------|---------|-----|---------|
| 94  | H19A | -0.989  | -5.6327 | 0.524   | H   | 0.0448  |
| 95  | H19B | -0.8422 | -6.5865 | 2.0377  | H   | 0.0448  |
| 96  | H5   | -1.4032 | -1.5686 | 3.6357  | H   | 0.1896  |
| 97  | H22B | 1.0487  | -2.2598 | 4.6847  | H   | 0.032   |
| 98  | H22A | 0.1208  | -1.9648 | 6.1746  | H   | 0.032   |
| 99  | O6   | 0.6214  | -2.7169 | 1.4628  | O.2 | -0.3959 |
| 100 | C16  | 1.9961  | -5.2238 | -0.6755 | C.3 | 0.0254  |
| 101 | H7A  | -1.6843 | -0.9512 | -1.2587 | H   | 0.0826  |
| 102 | H3A  | -2.9348 | -1.5458 | -5.5768 | H   | 0.0582  |
| 103 | O57  | -2.8994 | -4.0917 | -1.2046 | O.3 | -0.3874 |
| 104 | H3   | -2.191  | -4.6048 | -1.5776 | H   | 0.2101  |
| 105 | H9C  | -3.3368 | -1.2385 | 0.5649  | H   | 0.0257  |
| 106 | H9A  | -4.128  | -2.829  | 0.7526  | H   | 0.0257  |
| 107 | H9B  | -4.4028 | -1.8661 | -0.7353 | H   | 0.0257  |
| 108 | H2A  | -1.9476 | 0.2885  | -7.0007 | H   | 0.0574  |
| 109 | H4B  | 0.0784  | -1.9487 | -6.0688 | H   | 0.0253  |
| 110 | H4A  | -1.1433 | -3.2277 | -5.8395 | H   | 0.0253  |
| 111 | H4C  | -1.2225 | -2.1673 | -7.2776 | H   | 0.0253  |
| 112 | H5C  | -3.7912 | 0.8501  | -5.4373 | H   | 0.0258  |
| 113 | H5A  | -2.6112 | 2.1991  | -5.462  | H   | 0.0258  |
| 114 | H5B  | -2.6421 | 1.0508  | -4.0913 | H   | 0.0258  |
| 115 | H49A | 1.5668  | 0.2293  | -4.0224 | H   | 0.0918  |
| 116 | H52A | 3.4173  | 4.485   | -3.848  | H   | 0.0557  |
| 117 | H53A | 5.3479  | 4.758   | -2.3315 | H   | 0.0599  |
| 118 | H54A | 6.5801  | 2.7655  | -1.5057 | H   | 0.0559  |
| 119 | H55A | 5.8937  | 0.496   | -2.2451 | H   | 0.0599  |
| 120 | H56A | 3.949   | 0.2117  | -3.7341 | H   | 0.0557  |
| 121 | H43A | 0.1455  | 1.7278  | -0.0174 | H   | 0.0805  |
| 122 | H47A | -0.6657 | 3.3836  | -3.53   | H   | 0.0488  |
| 123 | H47C | -0.5052 | 4.5435  | -2.2103 | H   | 0.0488  |
| 124 | H47B | 0.8735  | 4.2575  | -3.2548 | H   | 0.0488  |
| 125 | H45C | 2.5182  | 4.3714  | -1.3424 | H   | 0.0234  |
| 126 | H45B | 3.0913  | 4.8644  | 0.2699  | H   | 0.0234  |
| 127 | H45A | 1.4617  | 5.3336  | -0.2816 | H   | 0.0234  |
| 128 | H46B | 2.3527  | 1.1505  | 0.6489  | H   | 0.0234  |
| 129 | H46A | 3.5694  | 2.3966  | 0.9958  | H   | 0.0234  |
| 130 | H46C | 3.1931  | 1.9866  | -0.6903 | H   | 0.0234  |
| 131 | H38A | -3.3214 | 4.6581  | -0.5686 | H   | 0.0802  |
| 132 | H28A | -2.1513 | 2.074   | 1.8296  | H   | 0.088   |
| 133 | H36A | -4.9752 | 4.444   | 3.8024  | H   | 0.0489  |
| 134 | H36B | -3.8136 | 3.5506  | 4.7896  | H   | 0.0489  |
| 135 | H36C | -3.3593 | 5.1478  | 4.1308  | H   | 0.0489  |
| 136 | H35A | 1.1668  | 3.7493  | 4.54    | H   | 0.0557  |
| 137 | H34A | 3.3175  | 2.5344  | 4.6109  | H   | 0.0599  |
| 138 | H33A | 3.4666  | 0.2238  | 3.7014  | H   | 0.0559  |
| 139 | H32A | 1.4677  | -0.8209 | 2.693   | H   | 0.0599  |
| 140 | H31A | -0.6311 | 0.4346  | 2.4498  | H   | 0.0557  |

**Table S6.** Continued

|     |       |         |         |         |    |        |
|-----|-------|---------|---------|---------|----|--------|
| 141 | H25A  | -3.8482 | 0.0141  | 5.79    | H  | 0.0619 |
| 142 | H21A  | -1.3758 | -3.9596 | 5.4795  | H  | 0.0854 |
| 143 | H23A  | 0.5996  | -4.277  | 7.0029  | H  | 0.0233 |
| 144 | H23B  | 2.1097  | -3.3823 | 6.6718  | H  | 0.0233 |
| 145 | H23C  | 1.5482  | -4.6341 | 5.5324  | H  | 0.0233 |
| 146 | H18A  | 1.4169  | -5.7303 | 1.886   | H  | 0.0619 |
| 147 | H11A  | 2.1329  | -2.8322 | -2.0051 | H  | 0.0802 |
| 148 | H15A  | 5.9719  | -3.3737 | -1.3074 | H  | 0.0232 |
| 149 | H15C  | 5.0602  | -2.0659 | -2.1162 | H  | 0.0232 |
| 150 | H15B  | 4.357   | -3.7014 | -1.9704 | H  | 0.0232 |
| 151 | H14C  | 4.8718  | -1.3412 | 1.6598  | H  | 0.0232 |
| 152 | H14A  | 5.4564  | -0.6682 | 0.111   | H  | 0.0232 |
| 153 | H14B  | 6.2725  | -2.0866 | 0.8401  | H  | 0.0232 |
| 154 | H16C  | 1.1636  | -5.9377 | -0.5971 | H  | 0.0488 |
| 155 | H16A  | 2.85    | -5.5956 | -0.0906 | H  | 0.0488 |
| 156 | H16B  | 2.2902  | -5.1857 | -1.7326 | H  | 0.0488 |
| 157 | P4    | -0.7625 | -2.4479 | -6.3953 | Du | 0      |
| 158 | P5    | -3.0148 | 1.3667  | -4.9969 | Du | 0      |
| 159 | P9    | -3.9559 | -1.9778 | 0.1941  | Du | 0      |
| 160 | P12   | 2.9085  | -1.1958 | -0.0949 | Du | 0      |
| 161 | P15   | 5.1297  | -3.047  | -1.798  | Du | 0      |
| 162 | P14   | 5.5336  | -1.3653 | 0.8703  | Du | 0      |
| 163 | P16   | 2.1013  | -5.573  | -0.8068 | Du | 0      |
| 164 | P22   | 0.5847  | -2.1123 | 5.4297  | Du | 0      |
| 165 | P23   | 1.4192  | -4.0978 | 6.4024  | Du | 0      |
| 166 | P29   | -1.1882 | 3.5775  | 3.8474  | Du | 0      |
| 167 | P3135 | 0.2678  | 2.092   | 3.4949  | Du | 0      |
| 168 | P36   | -4.0493 | 4.3808  | 4.2409  | Du | 0      |
| 169 | P39   | -5.0023 | 2.6864  | -0.1002 | Du | 0      |
| 170 | P40   | -4.0076 | 1.8491  | -2.077  | Du | 0      |
| 171 | P41   | -1.9903 | 1.2517  | -1.0105 | Du | 0      |
| 172 | P46   | 3.0384  | 1.8445  | 0.3182  | Du | 0      |
| 173 | P45   | 2.357   | 4.8565  | -0.4514 | Du | 0      |
| 174 | P47   | -0.0991 | 4.0615  | -2.9983 | Du | 0      |
| 175 | P50   | 2.1839  | 2.3598  | -5.3159 | Du | 0      |
| 176 | P19   | -0.9156 | -6.1096 | 1.2809  | Du | 0      |

<sup>a</sup>Atom nomenclature as in Figure 1a. <sup>b</sup>Pseudoatoms used in modeling are designated by “P” followed by the number of the relevant carbon atom(s). <sup>c</sup>Tripos forcefield atom type. <sup>d</sup>Gasteiger-Huckel charges.

**Table S7.** Atom coordinates for modeled grassypeptolide C (**3**) structure 3

| Atom number | Atom name <sup>a,b</sup> | x       | y       | z       | Atom type <sup>c</sup> | Charge <sup>d</sup> |
|-------------|--------------------------|---------|---------|---------|------------------------|---------------------|
| 1           | N2                       | -3.1374 | -2.2402 | -1.762  | N.am                   | -0.2613             |
| 2           | C7                       | -3.6879 | -2.7154 | -3.0309 | C.3                    | 0.1563              |
| 3           | C6                       | -4.636  | -1.7092 | -3.6517 | C.2                    | 0.2046              |
| 4           | N1                       | -4.3306 | -0.3862 | -3.6765 | N.am                   | -0.2796             |
| 5           | C3                       | -5.2769 | 0.592   | -4.2197 | C.3                    | 0.0598              |
| 6           | O3                       | -5.6716 | -2.1472 | -4.1294 | O.2                    | -0.3944             |
| 7           | C2                       | -5.9729 | 1.3634  | -3.0612 | C.3                    | 0.08                |
| 8           | C1                       | -5.0264 | 2.2802  | -2.3264 | C.2                    | 0.2415              |
| 9           | O1                       | -3.9706 | 1.6852  | -1.7485 | O.3                    | -0.2498             |
| 10          | O2                       | -5.2384 | 3.4829  | -2.2852 | O.2                    | -0.3699             |
| 11          | C49                      | -3.1718 | 2.5597  | -0.9226 | C.3                    | 0.1852              |
| 12          | C48                      | -1.9036 | 1.8136  | -0.5635 | C.2                    | 0.2166              |
| 13          | N9                       | -0.7801 | 1.8627  | -1.3341 | N.am                   | -0.252              |
| 14          | O10                      | -1.9224 | 1.1848  | 0.4828  | O.2                    | -0.3933             |
| 15          | C43                      | 0.4252  | 1.1869  | -0.8361 | C.3                    | 0.1359              |
| 16          | C47                      | -0.7747 | 2.6234  | -2.5907 | C.3                    | 0.0255              |
| 17          | C42                      | 1.6591  | 1.9884  | -1.1848 | C.2                    | 0.2068              |
| 18          | N8                       | 1.8738  | 3.2113  | -0.6261 | N.am                   | -0.2498             |
| 19          | C38                      | 3.0915  | 3.953   | -0.9175 | C.3                    | 0.134               |
| 20          | C39                      | 3.1333  | 4.9623  | 0.2552  | C.3                    | -0.0104             |
| 21          | C40                      | 1.6269  | 5.2148  | 0.5275  | C.3                    | -0.0281             |
| 22          | C41                      | 0.9393  | 3.8391  | 0.3106  | C.3                    | 0.0369              |
| 23          | C37                      | 4.3455  | 3.1835  | -1.3321 | C.2                    | 0.2073              |
| 24          | N7                       | 5.1969  | 2.3822  | -0.6075 | N.am                   | -0.2484             |
| 25          | O8                       | 4.5797  | 3.3407  | -2.5219 | O.2                    | -0.3941             |
| 26          | C28                      | 5.0402  | 2.1043  | 0.8366  | C.3                    | 0.128               |
| 27          | C27                      | 5.9674  | 0.9866  | 1.2658  | C.2                    | 0.1037              |
| 28          | C36                      | 6.3238  | 1.7828  | -1.3447 | C.3                    | 0.0266              |
| 29          | S2                       | 7.275   | 1.2482  | 2.433   | S.3                    | -0.0463             |
| 30          | C26                      | 7.3025  | -0.5557 | 2.6137  | C.3                    | 0.043               |
| 31          | C25                      | 6.7233  | -1.1092 | 1.2844  | C.3                    | 0.1001              |
| 32          | N6                       | 5.7718  | -0.1612 | 0.7549  | N.2                    | -0.332              |
| 33          | C24                      | 6.043   | -2.444  | 1.4791  | C.2                    | 0.1895              |
| 34          | N5                       | 4.8354  | -2.6306 | 0.8906  | N.am                   | -0.2623             |
| 35          | O7                       | 6.6057  | -3.2896 | 2.1564  | O.2                    | -0.396              |
| 36          | C21                      | 4.0827  | -3.8761 | 1.0519  | C.3                    | 0.1158              |
| 37          | C20                      | 2.8357  | -3.566  | 1.8411  | C.2                    | 0.1014              |
| 38          | S1                       | 2.9575  | -3.3134 | 3.5913  | S.3                    | -0.0465             |
| 39          | C19                      | 1.3796  | -2.4417 | 3.4136  | C.3                    | 0.043               |
| 40          | C18                      | 0.6843  | -3.189  | 2.2461  | C.3                    | 0.1002              |
| 41          | N4                       | 1.706   | -3.4804 | 1.2642  | N.2                    | -0.3321             |
| 42          | C17                      | -0.4981 | -2.4422 | 1.6752  | C.2                    | 0.1909              |
| 43          | C10                      | -3.395  | -2.8795 | -0.5958 | C.2                    | 0.2042              |
| 44          | C11                      | -2.6887 | -2.4011 | 0.6536  | C.3                    | 0.1336              |
| 45          | O5                       | -4.1475 | -3.8375 | -0.5128 | O.2                    | -0.3944             |
| 46          | N3                       | -1.3967 | -3.0652 | 0.8592  | N.am                   | -0.2542             |

**Table S7. Continued**

|    |      |         |         |         |      |         |
|----|------|---------|---------|---------|------|---------|
| 47 | O6   | -0.6439 | -1.2827 | 2.0308  | O.2  | -0.3959 |
| 48 | C16  | -1.1743 | -4.4597 | 0.4609  | C.3  | 0.0254  |
| 49 | O9   | 2.4593  | 1.4954  | -1.9619 | O.2  | -0.3942 |
| 50 | C5   | -6.6287 | 0.3844  | -2.0513 | C.3  | -0.0418 |
| 51 | C4   | -4.5522 | 1.5507  | -5.2006 | C.3  | -0.0395 |
| 52 | C8   | -2.5233 | -3.0649 | -3.997  | C.3  | 0.0924  |
| 53 | O4   | -3.0172 | -3.7134 | -5.1833 | O.3  | -0.3874 |
| 54 | C9   | -1.5112 | -4.0248 | -3.3159 | C.3  | -0.0346 |
| 55 | C12  | -3.4741 | -2.7304 | 1.9524  | C.3  | -0.0099 |
| 56 | C13  | -4.9391 | -2.2173 | 1.9801  | C.3  | -0.0425 |
| 57 | C15  | -5.5358 | -2.5055 | 3.3837  | C.3  | -0.0625 |
| 58 | C14  | -5.0328 | -0.7049 | 1.6464  | C.3  | -0.0625 |
| 59 | C22  | 3.8079  | -4.4977 | -0.3442 | C.3  | -0.013  |
| 60 | C23  | 3.1368  | -5.8935 | -0.2485 | C.3  | -0.0602 |
| 61 | C29  | 3.6778  | 1.5688  | 1.347   | C.3  | 0.0238  |
| 62 | C30  | 3.7097  | 1.3224  | 2.862   | C.ar | -0.0376 |
| 63 | C31  | 3.4963  | 2.3828  | 3.7503  | C.ar | -0.06   |
| 64 | C32  | 3.5608  | 2.1717  | 5.1303  | C.ar | -0.0686 |
| 65 | C33  | 3.8363  | 0.8959  | 5.6297  | C.ar | -0.0687 |
| 66 | C34  | 4.0334  | -0.1692 | 4.7469  | C.ar | -0.0686 |
| 67 | C35  | 3.9504  | 0.0416  | 3.3677  | C.ar | -0.06   |
| 68 | C44  | 0.3998  | -0.3043 | -1.2891 | C.3  | -0.0061 |
| 69 | C46  | 0.2369  | -0.4771 | -2.8241 | C.3  | -0.0584 |
| 70 | C45  | 1.6034  | -1.1319 | -0.7651 | C.3  | -0.0584 |
| 71 | C50  | -3.9276 | 2.9611  | 0.378   | C.3  | 0.0292  |
| 72 | C51  | -2.9673 | 3.7106  | 1.3174  | C.ar | -0.0379 |
| 73 | C52  | -2.506  | 3.121   | 2.501   | C.ar | -0.0601 |
| 74 | C53  | -1.5754 | 3.7844  | 3.306   | C.ar | -0.0686 |
| 75 | C54  | -1.1209 | 5.0563  | 2.9484  | C.ar | -0.0687 |
| 76 | C55  | -1.6062 | 5.6662  | 1.7887  | C.ar | -0.0686 |
| 77 | C56  | -2.5342 | 4.9991  | 0.9838  | C.ar | -0.0601 |
| 78 | H2   | -2.5161 | -1.4604 | -1.7887 | H    | 0.1884  |
| 79 | H7A  | -4.264  | -3.6413 | -2.8797 | H    | 0.0826  |
| 80 | H1   | -3.4827 | -0.0266 | -3.2851 | H    | 0.1856  |
| 81 | H3A  | -6.0868 | 0.0985  | -4.7846 | H    | 0.0582  |
| 82 | H2A  | -6.7749 | 1.986   | -3.4964 | H    | 0.0574  |
| 83 | H49A | -2.9093 | 3.4876  | -1.4512 | H    | 0.0918  |
| 84 | H43A | 0.4494  | 1.1498  | 0.2644  | H    | 0.0805  |
| 85 | H47C | -1.6593 | 2.3804  | -3.1976 | H    | 0.0488  |
| 86 | H47A | 0.1038  | 2.3844  | -3.2066 | H    | 0.0488  |
| 87 | H47B | -0.752  | 3.7064  | -2.4022 | H    | 0.0488  |
| 88 | H38A | 2.7928  | 4.5719  | -1.7808 | H    | 0.0802  |
| 89 | H39B | 3.6826  | 5.8854  | 0.0059  | H    | 0.0313  |
| 90 | H39A | 3.5871  | 4.5315  | 1.1544  | H    | 0.0313  |
| 91 | H40B | 1.4412  | 5.6386  | 1.5276  | H    | 0.0287  |
| 92 | H40A | 1.2514  | 5.9278  | -0.2263 | H    | 0.0287  |
| 93 | H41A | 0.8616  | 3.2998  | 1.2666  | H    | 0.0524  |



**Table S7. Continued**

|     |      |         |         |         |   |        |
|-----|------|---------|---------|---------|---|--------|
| 94  | H41B | -0.0693 | 3.971   | -0.102  | H | 0.0524 |
| 95  | H28A | 5.333   | 3.0043  | 1.3969  | H | 0.088  |
| 96  | H36B | 6.0338  | 0.7744  | -1.6759 | H | 0.0489 |
| 97  | H36A | 7.2248  | 1.7102  | -0.7187 | H | 0.0489 |
| 98  | H36C | 6.6423  | 2.3562  | -2.2274 | H | 0.0489 |
| 99  | H26B | 8.3174  | -0.9274 | 2.8229  | H | 0.0448 |
| 100 | H26A | 6.6456  | -0.8049 | 3.4606  | H | 0.0448 |
| 101 | H25A | 7.5257  | -1.2164 | 0.5355  | H | 0.0619 |
| 102 | H5   | 4.4192  | -1.9001 | 0.3442  | H | 0.1896 |
| 103 | H21A | 4.6354  | -4.6242 | 1.64    | H | 0.0854 |
| 104 | H19B | 0.796   | -2.459  | 4.3473  | H | 0.0448 |
| 105 | H19A | 1.5983  | -1.3993 | 3.1375  | H | 0.0448 |
| 106 | H18A | 0.2852  | -4.1299 | 2.6562  | H | 0.0619 |
| 107 | H11A | -2.5585 | -1.3123 | 0.5756  | H | 0.0802 |
| 108 | H16A | -1.3726 | -5.1295 | 1.3101  | H | 0.0488 |
| 109 | H16C | -1.831  | -4.782  | -0.3555 | H | 0.0488 |
| 110 | H16B | -0.1485 | -4.6099 | 0.1013  | H | 0.0488 |
| 111 | H5A  | -7.3707 | -0.2515 | -2.5584 | H | 0.0258 |
| 112 | H5B  | -7.1373 | 0.9479  | -1.2534 | H | 0.0258 |
| 113 | H5C  | -5.8718 | -0.2648 | -1.5882 | H | 0.0258 |
| 114 | H4A  | -3.746  | 2.0996  | -4.6927 | H | 0.0253 |
| 115 | H4C  | -4.1102 | 0.9681  | -6.0235 | H | 0.0253 |
| 116 | H4B  | -5.2606 | 2.2798  | -5.6237 | H | 0.0253 |
| 117 | H8A  | -1.9952 | -2.1404 | -4.281  | H | 0.0639 |
| 118 | H4   | -3.6185 | -3.1703 | -5.6825 | H | 0.2101 |
| 119 | H9B  | -2.0162 | -4.9527 | -3.0069 | H | 0.0257 |
| 120 | H9C  | -1.0521 | -3.5628 | -2.4287 | H | 0.0257 |
| 121 | H9A  | -0.7067 | -4.2832 | -4.0211 | H | 0.0257 |
| 122 | H12A | -2.9365 | -2.2917 | 2.8084  | H | 0.0315 |
| 123 | H12B | -3.4858 | -3.8238 | 2.0919  | H | 0.0315 |
| 124 | H13A | -5.5324 | -2.7764 | 1.2397  | H | 0.0298 |
| 125 | H15C | -4.9845 | -1.9445 | 4.1545  | H | 0.0232 |
| 126 | H15A | -5.4636 | -3.5805 | 3.6134  | H | 0.0232 |
| 127 | H15B | -6.5943 | -2.21   | 3.4186  | H | 0.0232 |
| 128 | H14B | -4.7515 | -0.5167 | 0.6003  | H | 0.0232 |
| 129 | H14C | -4.3631 | -0.1323 | 2.3053  | H | 0.0232 |
| 130 | H14A | -6.0632 | -0.3455 | 1.7833  | H | 0.0232 |
| 131 | H22B | 3.1756  | -3.8212 | -0.9379 | H | 0.032  |
| 132 | H22A | 4.7706  | -4.6021 | -0.8709 | H | 0.032  |
| 133 | H23B | 2.9601  | -6.2942 | -1.2592 | H | 0.0233 |
| 134 | H23A | 2.1713  | -5.8346 | 0.2749  | H | 0.0233 |
| 135 | H23C | 3.7881  | -6.5952 | 0.2954  | H | 0.0233 |
| 136 | H29B | 2.8951  | 2.2986  | 1.2154  | H | 0.0485 |
| 137 | H29A | 3.3824  | 0.6673  | 0.7931  | H | 0.0485 |
| 138 | H31A | 3.278   | 3.3762  | 3.3701  | H | 0.0557 |
| 139 | H32A | 3.3969  | 2.9987  | 5.8143  | H | 0.0599 |
| 140 | H33A | 3.8957  | 0.733   | 6.7012  | H | 0.0559 |

**Table S7. Continued**

|     |       |         |         |         |    |        |
|-----|-------|---------|---------|---------|----|--------|
| 141 | H34A  | 4.2517  | -1.1588 | 5.1347  | H  | 0.0599 |
| 142 | H35A  | 4.073   | -0.7903 | 2.6851  | H  | 0.0557 |
| 143 | H44A  | -0.4836 | -0.7476 | -0.8042 | H  | 0.0343 |
| 144 | H46A  | -0.7187 | -0.0535 | -3.1658 | H  | 0.0234 |
| 145 | H46B  | 0.2446  | -1.5436 | -3.0889 | H  | 0.0234 |
| 146 | H46C  | 1.0569  | 0.0094  | -3.3698 | H  | 0.0234 |
| 147 | H45C  | 1.422   | -2.1938 | -0.9865 | H  | 0.0234 |
| 148 | H45A  | 2.548   | -0.8397 | -1.2444 | H  | 0.0234 |
| 149 | H45B  | 1.7045  | -1.0209 | 0.3246  | H  | 0.0234 |
| 150 | H50B  | -4.3249 | 2.0561  | 0.8617  | H  | 0.048  |
| 151 | H50A  | -4.7846 | 3.6176  | 0.1661  | H  | 0.048  |
| 152 | H52A  | -2.863  | 2.1417  | 2.8033  | H  | 0.0557 |
| 153 | H53A  | -1.2049 | 3.3112  | 4.2103  | H  | 0.0599 |
| 154 | H54A  | -0.3939 | 5.5694  | 3.5704  | H  | 0.0559 |
| 155 | H55A  | -1.2609 | 6.6578  | 1.5126  | H  | 0.0599 |
| 156 | H56A  | -2.9153 | 5.4881  | 0.0932  | H  | 0.0557 |
| 157 | P5    | -6.7933 | 0.1439  | -1.8    | Du | 0      |
| 158 | P4    | -4.3723 | 1.7825  | -5.4466 | Du | 0      |
| 159 | P9    | -1.2584 | -4.2662 | -3.1522 | Du | 0      |
| 160 | P12   | -3.2111 | -3.0577 | 2.4501  | Du | 0      |
| 161 | P15   | -5.6808 | -2.5783 | 3.7288  | Du | 0      |
| 162 | P14   | -5.0593 | -0.3315 | 1.5629  | Du | 0      |
| 163 | P16   | -1.1174 | -4.8405 | 0.3519  | Du | 0      |
| 164 | P22   | 3.9731  | -4.2117 | -0.9044 | Du | 0      |
| 165 | P23   | 2.9732  | -6.2413 | -0.2296 | Du | 0      |
| 166 | P29   | 3.1388  | 1.4829  | 1.0043  | Du | 0      |
| 167 | P3135 | 3.6755  | 1.293   | 3.0276  | Du | 0      |
| 168 | P36   | 6.6336  | 1.6136  | -1.5407 | Du | 0      |
| 169 | P39   | 3.6349  | 5.2085  | 0.5802  | Du | 0      |
| 170 | P40   | 1.3463  | 5.7832  | 0.6506  | Du | 0      |
| 171 | P41   | 0.3962  | 3.6354  | 0.5823  | Du | 0      |
| 172 | P45   | 1.8915  | -1.3515 | -0.6354 | Du | 0      |
| 173 | P46   | 0.1943  | -0.5292 | -3.2082 | Du | 0      |
| 174 | P47   | -0.7691 | 2.8237  | -2.9354 | Du | 0      |
| 175 | P50   | -4.5547 | 2.8369  | 0.5139  | Du | 0      |
| 176 | P19   | 1.1971  | -1.9292 | 3.7424  | Du | 0      |

<sup>a</sup>Atom nomenclature as in Figure 1a. <sup>b</sup>Pseudoatoms used in modeling are designated by “P” followed by the number of the relevant carbon atom(s). <sup>c</sup>Tripos forcefield atom type. <sup>d</sup>Gasteiger-Huckel charges.

**Table S8.** Atom coordinates for modeled grassypeptolide C (**3**) structure 4

| Atom number | Atom name <sup>a,b</sup> | x       | y       | z       | Atom type <sup>c</sup> | Charge <sup>d</sup> |
|-------------|--------------------------|---------|---------|---------|------------------------|---------------------|
| 1           | O1                       | -4.4747 | 2.0782  | -0.2663 | O.3                    | -0.2498             |
| 2           | C49                      | -3.9852 | 0.8485  | -0.8441 | C.3                    | 0.1852              |
| 3           | C48                      | -2.8144 | 0.2553  | -0.0819 | C.2                    | 0.2166              |
| 4           | C50                      | -3.6715 | 1.0303  | -2.3594 | C.3                    | 0.0292              |
| 5           | C51                      | -3.5995 | -0.3345 | -3.0651 | C.ar                   | -0.0379             |
| 6           | C52                      | -2.3808 | -1.0061 | -3.2123 | C.ar                   | -0.0601             |
| 7           | C53                      | -2.3103 | -2.2129 | -3.9135 | C.ar                   | -0.0686             |
| 8           | C54                      | -3.4706 | -2.7754 | -4.4506 | C.ar                   | -0.0687             |
| 9           | C55                      | -4.6991 | -2.1345 | -4.2702 | C.ar                   | -0.0686             |
| 10          | C56                      | -4.7623 | -0.922  | -3.5772 | C.ar                   | -0.0601             |
| 11          | N9                       | -2.9466 | -0.5342 | 1.0246  | N.am                   | -0.252              |
| 12          | O10                      | -1.7125 | 0.5164  | -0.5338 | O.2                    | -0.3933             |
| 13          | C47                      | -4.2811 | -0.8374 | 1.5501  | C.3                    | 0.0255              |
| 14          | C43                      | -1.7296 | -1.0931 | 1.6379  | C.3                    | 0.1359              |
| 15          | C42                      | -1.852  | -2.5883 | 1.8541  | C.2                    | 0.2068              |
| 16          | C44                      | -1.2765 | -0.2702 | 2.8886  | C.3                    | -0.0061             |
| 17          | C46                      | -0.9214 | 1.1829  | 2.4744  | C.3                    | -0.0584             |
| 18          | C45                      | -2.2978 | -0.2261 | 4.0604  | C.3                    | -0.0584             |
| 19          | N8                       | -2.0921 | -3.4383 | 0.8165  | N.am                   | -0.2498             |
| 20          | O9                       | -1.6853 | -3.0175 | 2.9832  | O.2                    | -0.3942             |
| 21          | C38                      | -2.1879 | -4.8766 | 1.0496  | C.3                    | 0.134               |
| 22          | C39                      | -3.2499 | -5.1194 | -0.0583 | C.3                    | -0.0104             |
| 23          | C40                      | -2.6899 | -4.2974 | -1.2412 | C.3                    | -0.0281             |
| 24          | C41                      | -2.2982 | -2.9698 | -0.5517 | C.3                    | 0.0369              |
| 25          | C37                      | -1.0044 | -5.7987 | 0.7588  | C.2                    | 0.2073              |
| 26          | N7                       | 0.3252  | -5.5371 | 0.5497  | N.am                   | -0.2484             |
| 27          | O8                       | -1.3577 | -6.9665 | 0.6898  | O.2                    | -0.3941             |
| 28          | C36                      | 1.1814  | -6.6963 | 0.2639  | C.3                    | 0.0266              |
| 29          | C28                      | 0.9263  | -4.2029 | 0.6571  | C.3                    | 0.128               |
| 30          | C27                      | 1.7045  | -3.939  | -0.6108 | C.2                    | 0.1037              |
| 31          | C29                      | 1.8393  | -4.0829 | 1.9144  | C.3                    | 0.0238              |
| 32          | C30                      | 1.0433  | -4.0471 | 3.2295  | C.ar                   | -0.0376             |
| 33          | C31                      | 1.0543  | -2.9038 | 4.0387  | C.ar                   | -0.06               |
| 34          | C32                      | 0.2677  | -2.8394 | 5.1926  | C.ar                   | -0.0686             |
| 35          | C33                      | -0.5183 | -3.9328 | 5.565   | C.ar                   | -0.0687             |
| 36          | C34                      | -0.4936 | -5.0972 | 4.793   | C.ar                   | -0.0686             |
| 37          | C35                      | 0.302   | -5.1593 | 3.6455  | C.ar                   | -0.06               |
| 38          | S2                       | 0.8787  | -3.6646 | -2.1554 | S.3                    | -0.0463             |
| 39          | C26                      | 2.4345  | -2.9252 | -2.7193 | C.3                    | 0.043               |
| 40          | C25                      | 3.5161  | -3.6335 | -1.8632 | C.3                    | 0.1001              |
| 41          | N6                       | 2.9729  | -3.9227 | -0.557  | N.2                    | -0.332              |
| 42          | C24                      | 4.7394  | -2.7841 | -1.6304 | C.2                    | 0.1895              |
| 43          | N5                       | 4.5943  | -1.7136 | -0.8133 | N.am                   | -0.2623             |
| 44          | O7                       | 5.796   | -3.11   | -2.1482 | O.2                    | -0.396              |
| 45          | C21                      | 5.7481  | -0.933  | -0.37   | C.3                    | 0.1158              |
| 46          | C20                      | 5.5639  | 0.5298  | -0.6684 | C.2                    | 0.1014              |

**Table S8. Continued**

|    |      |         |         |         |      |         |
|----|------|---------|---------|---------|------|---------|
| 47 | C22  | 5.8725  | -1.0999 | 1.1686  | C.3  | -0.013  |
| 48 | C23  | 6.0739  | -2.5866 | 1.5621  | C.3  | -0.0602 |
| 49 | S1   | 6.9595  | 1.6103  | -0.8331 | S.3  | -0.0465 |
| 50 | C19  | 5.7816  | 2.78    | -1.5612 | C.3  | 0.043   |
| 51 | C18  | 4.4215  | 2.417   | -0.9098 | C.3  | 0.1002  |
| 52 | N4   | 4.3822  | 0.98    | -0.7707 | N.2  | -0.3321 |
| 53 | C17  | 3.2453  | 3.0523  | -1.6159 | C.2  | 0.1909  |
| 54 | N3   | 1.979   | 2.551   | -1.5502 | N.am | -0.2542 |
| 55 | O6   | 3.5051  | 4.0652  | -2.2448 | O.2  | -0.3959 |
| 56 | C11  | 0.9015  | 3.2938  | -2.2189 | C.3  | 0.1336  |
| 57 | C10  | 0.7358  | 4.5738  | -1.4402 | C.2  | 0.2042  |
| 58 | C16  | 1.715   | 1.3298  | -0.7809 | C.3  | 0.0254  |
| 59 | C12  | 1.0867  | 3.5387  | -3.7468 | C.3  | -0.0099 |
| 60 | C13  | 1.322   | 2.2489  | -4.5876 | C.3  | -0.0425 |
| 61 | C15  | 2.7451  | 1.6414  | -4.4473 | C.3  | -0.0625 |
| 62 | C14  | 0.2418  | 1.1759  | -4.2995 | C.3  | -0.0625 |
| 63 | N2   | 0.3365  | 4.4491  | -0.1509 | N.am | -0.2613 |
| 64 | O5   | 0.9808  | 5.6409  | -1.9806 | O.2  | -0.3944 |
| 65 | C7   | 0.1614  | 5.6176  | 0.7086  | C.3  | 0.1563  |
| 66 | C6   | -1.3105 | 5.9082  | 0.9203  | C.2  | 0.2046  |
| 67 | C8   | 0.8844  | 5.4173  | 2.0669  | C.3  | 0.0924  |
| 68 | O4   | 0.7385  | 6.6289  | 2.8293  | O.3  | -0.3874 |
| 69 | C9   | 2.3846  | 5.084   | 1.8472  | C.3  | -0.0346 |
| 70 | N1   | -2.1123 | 4.8928  | 1.3164  | N.am | -0.2796 |
| 71 | O3   | -1.7238 | 7.0404  | 0.7226  | O.2  | -0.3944 |
| 72 | C3   | -3.566  | 5.0292  | 1.3838  | C.3  | 0.0598  |
| 73 | C2   | -4.1741 | 4.4529  | 0.0707  | C.3  | 0.08    |
| 74 | C1   | -3.5986 | 3.094   | -0.2533 | C.2  | 0.2415  |
| 75 | O2   | -2.4078 | 2.979   | -0.4977 | O.2  | -0.3699 |
| 76 | C5   | -3.8931 | 5.3799  | -1.1443 | C.3  | -0.0418 |
| 77 | C4   | -4.1017 | 4.2711  | 2.6285  | C.3  | -0.0395 |
| 78 | H49A | -4.849  | 0.1718  | -0.8111 | H    | 0.0918  |
| 79 | H50A | -2.7335 | 1.5806  | -2.5323 | H    | 0.048   |
| 80 | H50B | -4.4745 | 1.6244  | -2.8228 | H    | 0.048   |
| 81 | H52A | -1.4776 | -0.5974 | -2.7809 | H    | 0.0557  |
| 82 | H53A | -1.3555 | -2.7135 | -4.0398 | H    | 0.0599  |
| 83 | H54A | -3.4178 | -3.7083 | -5.0034 | H    | 0.0559  |
| 84 | H55A | -5.6054 | -2.5789 | -4.6699 | H    | 0.0599  |
| 85 | H56A | -5.7234 | -0.4369 | -3.4396 | H    | 0.0557  |
| 86 | H47B | -4.226  | -1.4234 | 2.4777  | H    | 0.0488  |
| 87 | H47C | -4.8274 | 0.0937  | 1.7655  | H    | 0.0488  |
| 88 | H47A | -4.8648 | -1.4437 | 0.843   | H    | 0.0488  |
| 89 | H43A | -0.8603 | -1.0501 | 0.9596  | H    | 0.0805  |
| 90 | H44A | -0.3534 | -0.7271 | 3.2783  | H    | 0.0343  |
| 91 | H46A | -1.8144 | 1.6699  | 2.061   | H    | 0.0234  |
| 92 | H46B | -0.571  | 1.7662  | 3.3398  | H    | 0.0234  |
| 93 | H46C | -0.1271 | 1.1929  | 1.7146  | H    | 0.0234  |

**Table S8. Continued**

|     |      |         |         |         |   |        |
|-----|------|---------|---------|---------|---|--------|
| 94  | H45C | -2.612  | -1.2313 | 4.3746  | H | 0.0234 |
| 95  | H45A | -3.1868 | 0.3576  | 3.7824  | H | 0.0234 |
| 96  | H45B | -1.8381 | 0.2632  | 4.9335  | H | 0.0234 |
| 97  | H38A | -2.6149 | -5.1272 | 2.0353  | H | 0.0802 |
| 98  | H39A | -3.4197 | -6.1749 | -0.325  | H | 0.0313 |
| 99  | H39B | -4.2187 | -4.6903 | 0.2529  | H | 0.0313 |
| 100 | H40B | -3.428  | -4.1747 | -2.0503 | H | 0.0287 |
| 101 | H40A | -1.7975 | -4.7985 | -1.65   | H | 0.0287 |
| 102 | H41A | -3.1654 | -2.3033 | -0.6298 | H | 0.0524 |
| 103 | H41B | -1.4148 | -2.4906 | -0.9956 | H | 0.0524 |
| 104 | H36C | 0.8232  | -7.2082 | -0.6426 | H | 0.0489 |
| 105 | H36B | 1.1648  | -7.4084 | 1.1029  | H | 0.0489 |
| 106 | H36A | 2.2299  | -6.4184 | 0.0849  | H | 0.0489 |
| 107 | H28A | 0.2165  | -3.3813 | 0.7016  | H | 0.088  |
| 108 | H29B | 2.4333  | -3.1585 | 1.8277  | H | 0.0485 |
| 109 | H29A | 2.5486  | -4.9215 | 1.9704  | H | 0.0485 |
| 110 | H31A | 1.6748  | -2.0522 | 3.7788  | H | 0.0557 |
| 111 | H32A | 0.2656  | -1.9391 | 5.7995  | H | 0.0599 |
| 112 | H33A | -1.1438 | -3.8785 | 6.4506  | H | 0.0559 |
| 113 | H34A | -1.0922 | -5.9544 | 5.0856  | H | 0.0599 |
| 114 | H35A | 0.3411  | -6.0837 | 3.0841  | H | 0.0557 |
| 115 | H26A | 2.5888  | -3.0669 | -3.8002 | H | 0.0448 |
| 116 | H26B | 2.384   | -1.8482 | -2.4997 | H | 0.0448 |
| 117 | H25A | 3.7916  | -4.5995 | -2.3191 | H | 0.0619 |
| 118 | H5   | 3.7027  | -1.4893 | -0.4135 | H | 0.1896 |
| 119 | H21A | 6.6841  | -1.2543 | -0.8518 | H | 0.0854 |
| 120 | H22B | 4.9563  | -0.7196 | 1.6534  | H | 0.032  |
| 121 | H22A | 6.7239  | -0.5043 | 1.5367  | H | 0.032  |
| 122 | H23B | 6.189   | -2.6752 | 2.6539  | H | 0.0233 |
| 123 | H23A | 6.9777  | -2.9898 | 1.0795  | H | 0.0233 |
| 124 | H23C | 5.2083  | -3.1939 | 1.2549  | H | 0.0233 |
| 125 | H19A | 6.0831  | 3.8236  | -1.3799 | H | 0.0448 |
| 126 | H19B | 5.7435  | 2.5885  | -2.6453 | H | 0.0448 |
| 127 | H18A | 4.399   | 2.8256  | 0.1093  | H | 0.0619 |
| 128 | H11A | -0.0696 | 2.7838  | -2.1116 | H | 0.0802 |
| 129 | H16A | 0.6424  | 1.1621  | -0.645  | H | 0.0488 |
| 130 | H16B | 2.152   | 1.3959  | 0.2271  | H | 0.0488 |
| 131 | H16C | 2.1042  | 0.4415  | -1.2969 | H | 0.0488 |
| 132 | H12B | 0.1602  | 4.0194  | -4.1072 | H | 0.0315 |
| 133 | H12A | 1.8988  | 4.2476  | -3.9623 | H | 0.0315 |
| 134 | H13A | 1.2315  | 2.5568  | -5.6409 | H | 0.0298 |
| 135 | H15C | 2.8879  | 0.8571  | -5.2071 | H | 0.0232 |
| 136 | H15A | 2.8995  | 1.1779  | -3.4662 | H | 0.0232 |
| 137 | H15B | 3.5125  | 2.4152  | -4.5993 | H | 0.0232 |
| 138 | H14A | -0.766  | 1.6167  | -4.3529 | H | 0.0232 |
| 139 | H14C | 0.4003  | 0.7578  | -3.2962 | H | 0.0232 |
| 140 | H14B | 0.3075  | 0.3554  | -5.0284 | H | 0.0232 |

**Table S8.** Continued

|     |       |         |         |         |    |        |
|-----|-------|---------|---------|---------|----|--------|
| 141 | H2    | 0.1495  | 3.547   | 0.2384  | H  | 0.1884 |
| 142 | H7A   | 0.5956  | 6.4927  | 0.2095  | H  | 0.0826 |
| 143 | H8A   | 0.41    | 4.5835  | 2.6127  | H  | 0.0639 |
| 144 | H4    | 1.1353  | 6.5726  | 3.6926  | H  | 0.2101 |
| 145 | H9C   | 2.8786  | 5.9011  | 1.3003  | H  | 0.0257 |
| 146 | H9B   | 2.8916  | 4.952   | 2.8156  | H  | 0.0257 |
| 147 | H9A   | 2.4964  | 4.1532  | 1.2709  | H  | 0.0257 |
| 148 | H1    | -1.74   | 3.9827  | 1.4678  | H  | 0.1856 |
| 149 | H3A   | -3.8752 | 6.0859  | 1.4578  | H  | 0.0582 |
| 150 | H2A   | -5.2696 | 4.3816  | 0.1854  | H  | 0.0574 |
| 151 | H5A   | -4.3131 | 6.3833  | -0.9734 | H  | 0.0258 |
| 152 | H5C   | -2.8124 | 5.4791  | -1.3276 | H  | 0.0258 |
| 153 | H5B   | -4.3584 | 4.9611  | -2.0507 | H  | 0.0258 |
| 154 | H4B   | -5.19   | 4.4067  | 2.7278  | H  | 0.0253 |
| 155 | H4C   | -3.6151 | 4.6615  | 3.5355  | H  | 0.0253 |
| 156 | H4A   | -3.89   | 3.1935  | 2.5524  | H  | 0.0253 |
| 157 | P5    | -3.828  | 5.6079  | -1.4506 | Du | 0      |
| 158 | P4    | -4.2317 | 4.0873  | 2.9386  | Du | 0      |
| 159 | P9    | 2.7555  | 5.0021  | 1.7956  | Du | 0      |
| 160 | P12   | 1.0295  | 4.1335  | -4.0348 | Du | 0      |
| 161 | P15   | 3.1     | 1.4834  | -4.4242 | Du | 0      |
| 162 | P14   | -0.0194 | 0.91    | -4.2258 | Du | 0      |
| 163 | P22   | 5.8401  | -0.612  | 1.5951  | Du | 0      |
| 164 | P23   | 6.125   | -2.953  | 1.6628  | Du | 0      |
| 165 | P29   | 2.4909  | -4.04   | 1.899   | Du | 0      |
| 166 | P3135 | 1.0079  | -4.068  | 3.4315  | Du | 0      |
| 167 | P16   | 1.6329  | 0.9998  | -0.5716 | Du | 0      |
| 168 | P36   | 1.406   | -7.0116 | 0.1817  | Du | 0      |
| 169 | P39   | -3.8192 | -5.4326 | -0.036  | Du | 0      |
| 170 | P40   | -2.6127 | -4.4866 | -1.8501 | Du | 0      |
| 171 | P41   | -2.2901 | -2.3969 | -0.8127 | Du | 0      |
| 172 | P46   | -0.8375 | 1.543   | 2.3718  | Du | 0      |
| 173 | P45   | -2.5456 | -0.2035 | 4.3635  | Du | 0      |
| 174 | P47   | -4.6394 | -0.9245 | 1.6954  | Du | 0      |
| 175 | P50   | -3.604  | 1.6025  | -2.6776 | Du | 0      |
| 176 | P19   | 5.9133  | 3.2061  | -2.0126 | Du | 0      |

<sup>a</sup>Atom nomenclature as in Figure 1a. <sup>b</sup>Pseudoatoms used in modeling are designated by “P” followed by the number of the relevant carbon atom(s). <sup>c</sup>Tripos forcefield atom type. <sup>d</sup>Gasteiger-Huckel charges.

**Table S9.** Atom coordinates for modeled grassypeptolide C (**3**) structure 5

| Atom number | Atom name <sup>a,b</sup> | x       | y       | z       | Atom type <sup>c</sup> | Charge <sup>d</sup> |
|-------------|--------------------------|---------|---------|---------|------------------------|---------------------|
| 1           | N9                       | 1.6987  | 0.713   | 0.5826  | N.am                   | -0.252              |
| 2           | C43                      | 1.3947  | 0.4147  | 1.9988  | C.3                    | 0.1359              |
| 3           | C42                      | 1.088   | -1.0551 | 2.1936  | C.2                    | 0.2068              |
| 4           | C44                      | 0.2384  | 1.301   | 2.5833  | C.3                    | -0.0061             |
| 5           | C46                      | -0.9984 | 1.3819  | 1.6462  | C.3                    | -0.0584             |
| 6           | C45                      | -0.1527 | 0.9251  | 4.0441  | C.3                    | -0.0584             |
| 7           | N8                       | 2.0457  | -2.0142 | 2.2507  | N.am                   | -0.2498             |
| 8           | O9                       | -0.0827 | -1.3881 | 2.2542  | O.2                    | -0.3942             |
| 9           | C38                      | 1.6326  | -3.4065 | 2.2879  | C.3                    | 0.134               |
| 10          | C39                      | 2.9308  | -4.0792 | 1.7838  | C.3                    | -0.0104             |
| 11          | C40                      | 4.0577  | -3.1563 | 2.3077  | C.3                    | -0.0281             |
| 12          | C41                      | 3.4709  | -1.7258 | 2.1869  | C.3                    | 0.0369              |
| 13          | C37                      | 1.2732  | -3.7803 | 3.7071  | C.2                    | 0.2073              |
| 14          | N7                       | 0.288   | -4.6365 | 4.115   | N.am                   | -0.2484             |
| 15          | O8                       | 1.9838  | -3.2382 | 4.5398  | O.2                    | -0.3941             |
| 16          | C36                      | 0.1807  | -4.8236 | 5.57    | C.3                    | 0.0266              |
| 17          | C28                      | -0.6634 | -5.2815 | 3.1817  | C.3                    | 0.128               |
| 18          | C27                      | -0.0208 | -6.1463 | 2.1194  | C.2                    | 0.1037              |
| 19          | C29                      | -1.7787 | -4.362  | 2.583   | C.3                    | 0.0238              |
| 20          | C30                      | -2.4392 | -3.3866 | 3.5757  | C.ar                   | -0.0376             |
| 21          | C31                      | -2.7818 | -3.7821 | 4.8739  | C.ar                   | -0.06               |
| 22          | C32                      | -3.2894 | -2.8602 | 5.7938  | C.ar                   | -0.0686             |
| 23          | C33                      | -3.5012 | -1.5337 | 5.4113  | C.ar                   | -0.0687             |
| 24          | C34                      | -3.2274 | -1.1428 | 4.0987  | C.ar                   | -0.0686             |
| 25          | C35                      | -2.7276 | -2.0725 | 3.1826  | C.ar                   | -0.06               |
| 26          | S2                       | 0.4098  | -7.8451 | 2.4098  | S.3                    | -0.0463             |
| 27          | C26                      | 0.3379  | -8.0186 | 0.6004  | C.3                    | 0.043               |
| 28          | C25                      | 0.7852  | -6.624  | 0.1014  | C.3                    | 0.1001              |
| 29          | N6                       | 0.1937  | -5.6432 | 0.976   | N.2                    | -0.332              |
| 30          | C24                      | 0.3676  | -6.247  | -1.2981 | C.2                    | 0.1895              |
| 31          | N5                       | 0.1054  | -4.9302 | -1.4841 | N.am                   | -0.2623             |
| 32          | O7                       | 0.2978  | -7.0992 | -2.1691 | O.2                    | -0.396              |
| 33          | C21                      | -0.2179 | -4.368  | -2.7933 | C.3                    | 0.1158              |
| 34          | C20                      | -1.507  | -3.5913 | -2.745  | C.2                    | 0.1014              |
| 35          | C22                      | 0.8955  | -3.3418 | -3.1422 | C.3                    | -0.013              |
| 36          | C23                      | 2.2912  | -4.0156 | -3.1891 | C.3                    | -0.0602             |
| 37          | N4                       | -1.9292 | -3.1105 | -3.8435 | N.2                    | -0.3321             |
| 38          | C18                      | -2.9978 | -2.1788 | -3.5792 | C.3                    | 0.1002              |
| 39          | C19                      | -3.6902 | -2.6101 | -2.2591 | C.3                    | 0.043               |
| 40          | S1                       | -2.3721 | -3.2957 | -1.2215 | S.3                    | -0.0465             |
| 41          | C17                      | -2.2309 | -0.8779 | -3.4457 | C.2                    | 0.1909              |
| 42          | N3                       | -2.1158 | 0.0442  | -4.445  | N.am                   | -0.2542             |
| 43          | O6                       | -1.6597 | -0.7326 | -2.3767 | O.2                    | -0.3959             |
| 44          | C11                      | -1.2062 | 1.1785  | -4.2411 | C.3                    | 0.1336              |
| 45          | C16                      | -2.8147 | -0.163  | -5.7112 | C.3                    | 0.0254              |
| 46          | C10                      | -1.5241 | 1.8108  | -2.9201 | C.2                    | 0.2042              |

**Table S9. Continued**

|    |      |         |         |         |      |         |
|----|------|---------|---------|---------|------|---------|
| 47 | C12  | 0.2849  | 0.751   | -4.2856 | C.3  | -0.0099 |
| 48 | C13  | 0.7357  | 0.0739  | -5.6073 | C.3  | -0.0425 |
| 49 | C15  | 0.6027  | 1.02    | -6.8327 | C.3  | -0.0625 |
| 50 | C14  | 2.2191  | -0.3511 | -5.4413 | C.3  | -0.0625 |
| 51 | N2   | -2.7258 | 2.4     | -2.775  | N.am | -0.2613 |
| 52 | O5   | -0.6988 | 1.7758  | -2.0227 | O.2  | -0.3944 |
| 53 | C7   | -2.9813 | 3.1866  | -1.5781 | C.3  | 0.1563  |
| 54 | C8   | -4.4781 | 3.1125  | -1.1912 | C.3  | 0.0924  |
| 55 | O4   | -4.7763 | 4.0165  | -0.114  | O.3  | -0.3874 |
| 56 | C9   | -4.834  | 1.6476  | -0.8137 | C.3  | -0.0346 |
| 57 | C6   | -2.4023 | 4.5336  | -1.94   | C.2  | 0.2046  |
| 58 | N1   | -1.0468 | 4.5845  | -2.0205 | N.am | -0.2796 |
| 59 | O3   | -3.1435 | 5.4691  | -2.1947 | O.2  | -0.3944 |
| 60 | C3   | -0.3678 | 5.6615  | -2.7345 | C.3  | 0.0598  |
| 61 | C2   | 1.0979  | 5.8407  | -2.2361 | C.3  | 0.08    |
| 62 | C1   | 1.8517  | 4.5269  | -2.2671 | C.2  | 0.2415  |
| 63 | O1   | 1.8353  | 3.8454  | -1.1093 | O.3  | -0.2498 |
| 64 | O2   | 2.4047  | 4.1431  | -3.2853 | O.2  | -0.3699 |
| 65 | C49  | 2.3713  | 2.5025  | -1.126  | C.3  | 0.1852  |
| 66 | C48  | 2.1263  | 1.9756  | 0.2769  | C.2  | 0.2166  |
| 67 | O10  | 2.3296  | 2.8006  | 1.1537  | O.2  | -0.3933 |
| 68 | C50  | 3.8911  | 2.4013  | -1.4311 | C.3  | 0.0292  |
| 69 | C51  | 4.6892  | 3.2711  | -0.4495 | C.ar | -0.0379 |
| 70 | C56  | 4.9162  | 4.6236  | -0.7285 | C.ar | -0.0601 |
| 71 | C55  | 5.6499  | 5.4156  | 0.1592  | C.ar | -0.0686 |
| 72 | C54  | 6.1563  | 4.8606  | 1.3375  | C.ar | -0.0687 |
| 73 | C53  | 5.9258  | 3.5127  | 1.6257  | C.ar | -0.0686 |
| 74 | C52  | 5.1986  | 2.7205  | 0.7326  | C.ar | -0.0601 |
| 75 | C5   | 1.0886  | 6.4306  | -0.8027 | C.3  | -0.0418 |
| 76 | C4   | -0.3973 | 5.2616  | -4.2359 | C.3  | -0.0395 |
| 77 | C47  | 1.4634  | -0.2575 | -0.4984 | C.3  | 0.0255  |
| 78 | H43A | 2.2911  | 0.6521  | 2.5848  | H    | 0.0805  |
| 79 | H44A | 0.5985  | 2.335   | 2.6735  | H    | 0.0343  |
| 80 | H46C | -1.4911 | 0.4117  | 1.5078  | H    | 0.0234  |
| 81 | H46B | -1.7422 | 2.083   | 2.056   | H    | 0.0234  |
| 82 | H46A | -0.6858 | 1.7532  | 0.6604  | H    | 0.0234  |
| 83 | H45C | 0.7487  | 0.891   | 4.6761  | H    | 0.0234  |
| 84 | H45B | -0.8366 | 1.6818  | 4.4614  | H    | 0.0234  |
| 85 | H45A | -0.6588 | -0.0457 | 4.1178  | H    | 0.0234  |
| 86 | H38A | 0.8309  | -3.5379 | 1.5641  | H    | 0.0802  |
| 87 | H39A | 2.95    | -4.0567 | 0.6806  | H    | 0.0313  |
| 88 | H39B | 3.0273  | -5.1235 | 2.1222  | H    | 0.0313  |
| 89 | H40B | 4.2484  | -3.3972 | 3.3665  | H    | 0.0287  |
| 90 | H40A | 5.0017  | -3.2768 | 1.7514  | H    | 0.0287  |
| 91 | H41A | 3.8243  | -1.0892 | 3.0132  | H    | 0.0524  |
| 92 | H41B | 3.7246  | -1.2713 | 1.2168  | H    | 0.0524  |
| 93 | H36B | -0.4815 | -5.6508 | 5.8602  | H    | 0.0489  |



**Table S9.** Continued

|     |      |         |         |         |   |        |
|-----|------|---------|---------|---------|---|--------|
| 94  | H36A | -0.1944 | -3.8978 | 6.034   | H | 0.0489 |
| 95  | H36C | 1.1676  | -5.0534 | 6.003   | H | 0.0489 |
| 96  | H28A | -1.2295 | -6.043  | 3.7399  | H | 0.088  |
| 97  | H29A | -1.3854 | -3.7802 | 1.7416  | H | 0.0485 |
| 98  | H29B | -2.5874 | -4.9862 | 2.1685  | H | 0.0485 |
| 99  | H31A | -2.6652 | -4.8119 | 5.1817  | H | 0.0557 |
| 100 | H32A | -3.5219 | -3.1752 | 6.8064  | H | 0.0599 |
| 101 | H33A | -3.8798 | -0.8121 | 6.1284  | H | 0.0559 |
| 102 | H34A | -3.4034 | -0.1169 | 3.7901  | H | 0.0599 |
| 103 | H35A | -2.5725 | -1.7584 | 2.1556  | H | 0.0557 |
| 104 | H26B | 0.9806  | -8.8339 | 0.235   | H | 0.0448 |
| 105 | H26A | -0.7071 | -8.21   | 0.3109  | H | 0.0448 |
| 106 | H25A | 1.883   | -6.541  | 0.1724  | H | 0.0619 |
| 107 | H5   | 0.185   | -4.2909 | -0.7163 | H | 0.1896 |
| 108 | H21A | -0.296  | -5.1238 | -3.5912 | H | 0.0854 |
| 109 | H22B | 0.6766  | -2.8764 | -4.1166 | H | 0.032  |
| 110 | H22A | 0.9049  | -2.5394 | -2.3838 | H | 0.032  |
| 111 | H23B | 2.5512  | -4.4425 | -2.2081 | H | 0.0233 |
| 112 | H23A | 3.0612  | -3.276  | -3.4582 | H | 0.0233 |
| 113 | H23C | 2.3003  | -4.8214 | -3.9395 | H | 0.0233 |
| 114 | H18A | -3.7325 | -2.2062 | -4.3938 | H | 0.0619 |
| 115 | H19B | -4.2106 | -1.7752 | -1.7656 | H | 0.0448 |
| 116 | H19A | -4.4063 | -3.4249 | -2.452  | H | 0.0448 |
| 117 | H11A | -1.3483 | 2.004   | -4.9566 | H | 0.0802 |
| 118 | H16C | -2.6366 | 0.6578  | -6.4175 | H | 0.0488 |
| 119 | H16B | -2.4836 | -1.0996 | -6.1845 | H | 0.0488 |
| 120 | H16A | -3.9003 | -0.1896 | -5.5354 | H | 0.0488 |
| 121 | H12A | 0.9105  | 1.6434  | -4.1222 | H | 0.0315 |
| 122 | H12A | 0.4743  | 0.0434  | -3.4646 | H | 0.0315 |
| 123 | H13A | 0.1312  | -0.8329 | -5.7799 | H | 0.0298 |
| 124 | H15C | 1.0247  | 0.5384  | -7.7278 | H | 0.0232 |
| 125 | H15A | 1.1423  | 1.9616  | -6.65   | H | 0.0232 |
| 126 | H15B | -0.4458 | 1.2581  | -7.0504 | H | 0.0232 |
| 127 | H14A | 2.569   | -0.877  | -6.3407 | H | 0.0232 |
| 128 | H14B | 2.8474  | 0.5379  | -5.2769 | H | 0.0232 |
| 129 | H14C | 2.337   | -1.0212 | -4.5768 | H | 0.0232 |
| 130 | H2   | -3.3868 | 2.4158  | -3.5289 | H | 0.1884 |
| 131 | H7A  | -2.3896 | 2.8089  | -0.7357 | H | 0.0826 |
| 132 | H8A  | -5.0848 | 3.419   | -2.0578 | H | 0.0639 |
| 133 | H4   | -4.2869 | 3.8165  | 0.6768  | H | 0.2101 |
| 134 | H9A  | -4.6602 | 0.9723  | -1.667  | H | 0.0257 |
| 135 | H9C  | -4.2143 | 1.3014  | 0.0291  | H | 0.0257 |
| 136 | H9B  | -5.8922 | 1.58    | -0.5217 | H | 0.0257 |
| 137 | H1   | -0.4905 | 3.7819  | -1.798  | H | 0.1856 |
| 138 | H3A  | -0.9291 | 6.609   | -2.6628 | H | 0.0582 |
| 139 | H2A  | 1.6218  | 6.5579  | -2.8908 | H | 0.0574 |
| 140 | H49A | 1.7992  | 1.9472  | -1.8786 | H | 0.0918 |

**Table S9.** Continued

|     |       |         |         |         |    |        |
|-----|-------|---------|---------|---------|----|--------|
| 141 | H50B  | 4.1258  | 2.7053  | -2.4615 | H  | 0.048  |
| 142 | H50A  | 4.2073  | 1.3506  | -1.3405 | H  | 0.048  |
| 143 | H56A  | 4.5251  | 5.0675  | -1.6376 | H  | 0.0557 |
| 144 | H55A  | 5.8271  | 6.4627  | -0.0665 | H  | 0.0599 |
| 145 | H54A  | 6.7272  | 5.4747  | 2.0272  | H  | 0.0559 |
| 146 | H53A  | 6.3118  | 3.0811  | 2.5444  | H  | 0.0599 |
| 147 | H52A  | 5.0301  | 1.6736  | 0.965   | H  | 0.0557 |
| 148 | H5A   | 2.1197  | 6.5275  | -0.4298 | H  | 0.0258 |
| 149 | H5C   | 0.615   | 7.4242  | -0.8041 | H  | 0.0258 |
| 150 | H5B   | 0.5213  | 5.7771  | -0.1213 | H  | 0.0258 |
| 151 | H4A   | 0.1012  | 4.2948  | -4.3988 | H  | 0.0253 |
| 152 | H4C   | 0.1026  | 6.0254  | -4.8515 | H  | 0.0253 |
| 153 | H4B   | -1.439  | 5.166   | -4.5804 | H  | 0.0253 |
| 154 | H47A  | 2.2404  | -0.207  | -1.2737 | H  | 0.0488 |
| 155 | H47B  | 0.4801  | -0.0706 | -0.9438 | H  | 0.0488 |
| 156 | H47C  | 1.4695  | -1.3041 | -0.1711 | H  | 0.0488 |
| 157 | P5    | 1.0853  | 6.5762  | -0.4517 | Du | 0      |
| 158 | P4    | -0.4118 | 5.1621  | -4.6102 | Du | 0      |
| 159 | P9    | -4.9222 | 1.2846  | -0.7199 | Du | 0      |
| 160 | P12   | 0.6924  | 0.8434  | -3.7934 | Du | 0      |
| 161 | P15   | 0.5737  | 1.2527  | -7.1427 | Du | 0      |
| 162 | P14   | 2.5845  | -0.4534 | -5.3981 | Du | 0      |
| 163 | P16   | -3.0068 | -0.2105 | -6.0458 | Du | 0      |
| 164 | P22   | 0.7907  | -2.7079 | -3.2502 | Du | 0      |
| 165 | P23   | 2.6376  | -4.18   | -3.2019 | Du | 0      |
| 166 | P29   | -1.9864 | -4.3832 | 1.955   | Du | 0      |
| 167 | P3135 | -2.6189 | -3.2852 | 3.6687  | Du | 0      |
| 168 | P36   | 0.1639  | -4.8673 | 5.9657  | Du | 0      |
| 169 | P39   | 2.9886  | -4.5901 | 1.4014  | Du | 0      |
| 170 | P40   | 4.625   | -3.337  | 2.5589  | Du | 0      |
| 171 | P41   | 3.7744  | -1.1802 | 2.115   | Du | 0      |
| 172 | P45   | -0.2489 | 0.8424  | 4.4184  | Du | 0      |
| 173 | P46   | -1.3064 | 1.416   | 1.4081  | Du | 0      |
| 174 | P47   | 1.3966  | -0.5272 | -0.7962 | Du | 0      |
| 175 | P50   | 4.1665  | 2.0279  | -1.901  | Du | 0      |
| 176 | P19   | -4.3084 | -2.6    | -2.1088 | Du | 0      |

<sup>a</sup>Atom nomenclature as in Figure 1a. <sup>b</sup>Pseudoatoms used in modeling are designated by “P” followed by the number of the relevant carbon atom(s). <sup>c</sup>Tripos forcefield atom type. <sup>d</sup>Gasteiger-Huckel charges.

**Table S10.** Atom coordinates for modeled grassypeptolide C (**3**) structure 6

| Atom number | Atom name <sup>a,b</sup> | x       | y       | z       | Atom type <sup>c</sup> | Charge <sup>d</sup> |
|-------------|--------------------------|---------|---------|---------|------------------------|---------------------|
| 1           | N3                       | -1.9268 | 3.7971  | -2.205  | N.am                   | -0.2542             |
| 2           | C11                      | -3.1637 | 3.201   | -2.7334 | C.3                    | 0.1336              |
| 3           | C10                      | -4.0972 | 3.0108  | -1.5659 | C.2                    | 0.2042              |
| 4           | N2                       | -3.7916 | 2.0402  | -0.675  | N.am                   | -0.2613             |
| 5           | C12                      | -3.8127 | 4.108   | -3.8146 | C.3                    | -0.0099             |
| 6           | C13                      | -2.861  | 4.4673  | -4.9898 | C.3                    | -0.0425             |
| 7           | C15                      | -2.4518 | 3.2212  | -5.8227 | C.3                    | -0.0625             |
| 8           | C14                      | -3.5772 | 5.5031  | -5.8975 | C.3                    | -0.0625             |
| 9           | O5                       | -5.0654 | 3.7467  | -1.452  | O.2                    | -0.3944             |
| 10          | C7                       | -4.6254 | 1.8328  | 0.5059  | C.3                    | 0.1563              |
| 11          | C6                       | -5.4891 | 0.6039  | 0.3227  | C.2                    | 0.2046              |
| 12          | N1                       | -4.9102 | -0.5842 | 0.0235  | N.am                   | -0.2796             |
| 13          | C8                       | -3.7481 | 1.7768  | 1.7812  | C.3                    | 0.0924              |
| 14          | C9                       | -2.9561 | 3.1023  | 1.9435  | C.3                    | -0.0346             |
| 15          | O4                       | -4.609  | 1.5478  | 2.9107  | O.3                    | -0.3874             |
| 16          | O3                       | -6.6986 | 0.7352  | 0.4347  | O.2                    | -0.3944             |
| 17          | C3                       | -5.7239 | -1.7531 | -0.3221 | C.3                    | 0.0598              |
| 18          | C2                       | -5.6398 | -1.9836 | -1.8615 | C.3                    | 0.08                |
| 19          | C1                       | -4.258  | -2.3999 | -2.2975 | C.2                    | 0.2415              |
| 20          | C4                       | -5.2674 | -2.9935 | 0.4924  | C.3                    | -0.0395             |
| 21          | C5                       | -6.0271 | -0.698  | -2.6405 | C.3                    | -0.0418             |
| 22          | O1                       | -3.2609 | -1.8437 | -1.5927 | O.3                    | -0.2498             |
| 23          | O2                       | -4.0989 | -3.1941 | -3.2122 | O.2                    | -0.3699             |
| 24          | C16                      | -1.9509 | 5.0806  | -1.4946 | C.3                    | 0.0254              |
| 25          | C17                      | -0.7392 | 3.1553  | -2.4062 | C.2                    | 0.1909              |
| 26          | C18                      | 0.5789  | 3.7313  | -1.9308 | C.3                    | 0.1002              |
| 27          | N4                       | 0.6175  | 3.8742  | -0.4942 | N.2                    | -0.3321             |
| 28          | C20                      | 1.8143  | 3.7562  | -0.084  | C.2                    | 0.1014              |
| 29          | S1                       | 3.1316  | 3.4424  | -1.2277 | S.3                    | -0.0465             |
| 30          | C19                      | 1.804   | 2.8544  | -2.3075 | C.3                    | 0.043               |
| 31          | O6                       | -0.6777 | 2.0872  | -2.992  | O.2                    | -0.3959             |
| 32          | C21                      | 2.0931  | 3.8957  | 1.3888  | C.3                    | 0.1158              |
| 33          | N5                       | 3.2765  | 3.1172  | 1.7378  | N.am                   | -0.2623             |
| 34          | C22                      | 0.9012  | 3.4017  | 2.2598  | C.3                    | -0.013              |
| 35          | C23                      | 0.5345  | 1.9073  | 2.0351  | C.3                    | -0.0602             |
| 36          | C24                      | 4.2372  | 3.603   | 2.5579  | C.2                    | 0.1895              |
| 37          | C25                      | 5.2635  | 2.5953  | 3.0066  | C.3                    | 0.1001              |
| 38          | O7                       | 4.2908  | 4.7545  | 2.9597  | O.2                    | -0.396              |
| 39          | C26                      | 6.3054  | 2.2705  | 1.9058  | C.3                    | 0.043               |
| 40          | S2                       | 6.7634  | 0.5443  | 2.2207  | S.3                    | -0.0463             |
| 41          | C27                      | 5.1241  | 0.3759  | 2.8831  | C.2                    | 0.1037              |
| 42          | N6                       | 4.4903  | 1.405   | 3.2708  | N.2                    | -0.332              |
| 43          | C28                      | 4.4166  | -0.9543 | 3.0062  | C.3                    | 0.128               |
| 44          | N7                       | 5.351   | -2.0021 | 2.5763  | N.am                   | -0.2484             |
| 45          | C29                      | 3.8423  | -1.1054 | 4.455   | C.3                    | 0.0238              |
| 46          | C30                      | 2.8778  | -2.2816 | 4.7182  | C.ar                   | -0.0376             |

**Table S10. Continued**

|    |      |         |         |         |      |         |
|----|------|---------|---------|---------|------|---------|
| 47 | C31  | 3.1061  | -3.5676 | 4.2145  | C.ar | -0.06   |
| 48 | C32  | 2.2105  | -4.6113 | 4.4647  | C.ar | -0.0686 |
| 49 | C33  | 1.075   | -4.3888 | 5.2461  | C.ar | -0.0687 |
| 50 | C34  | 0.8384  | -3.1147 | 5.766   | C.ar | -0.0686 |
| 51 | C35  | 1.7345  | -2.0742 | 5.5034  | C.ar | -0.06   |
| 52 | C37  | 5.2456  | -2.6205 | 1.3599  | C.2  | 0.2073  |
| 53 | C36  | 6.4457  | -2.4448 | 3.4531  | C.3  | 0.0266  |
| 54 | C38  | 4.3165  | -2.3044 | 0.1911  | C.3  | 0.134   |
| 55 | O8   | 6.0552  | -3.4922 | 1.0805  | O.2  | -0.3941 |
| 56 | C39  | 4.9145  | -1.1117 | -0.5959 | C.3  | -0.0104 |
| 57 | C40  | 3.7475  | -0.6379 | -1.4847 | C.3  | -0.0281 |
| 58 | C41  | 2.5469  | -0.7004 | -0.5167 | C.3  | 0.0369  |
| 59 | N8   | 2.9262  | -1.8624 | 0.2802  | N.am | -0.2498 |
| 60 | C42  | 2.0134  | -2.568  | 0.9929  | C.2  | 0.2068  |
| 61 | C43  | 0.5445  | -2.1777 | 0.9801  | C.3  | 0.1359  |
| 62 | O9   | 2.36    | -3.5345 | 1.6491  | O.2  | -0.3942 |
| 63 | N9   | -0.0854 | -2.5928 | -0.2881 | N.am | -0.252  |
| 64 | C44  | -0.2518 | -2.6968 | 2.2226  | C.3  | -0.0061 |
| 65 | C46  | -1.5666 | -1.8985 | 2.4623  | C.3  | -0.0584 |
| 66 | C45  | -0.587  | -4.2137 | 2.1777  | C.3  | -0.0584 |
| 67 | C48  | -1.0648 | -1.7999 | -0.8199 | C.2  | 0.2166  |
| 68 | C49  | -1.9233 | -2.1821 | -2.0134 | C.3  | 0.1852  |
| 69 | O10  | -1.3524 | -0.7246 | -0.3159 | O.2  | -0.3933 |
| 70 | C47  | 0.2359  | -3.8798 | -0.9199 | C.3  | 0.0255  |
| 71 | C50  | -1.5779 | -1.3731 | -3.2918 | C.3  | 0.0292  |
| 72 | C51  | -0.263  | -1.8251 | -3.9416 | C.ar | -0.0379 |
| 73 | C52  | -0.1861 | -3.0833 | -4.5503 | C.ar | -0.0601 |
| 74 | C53  | 0.999   | -3.5044 | -5.1604 | C.ar | -0.0686 |
| 75 | C54  | 2.1114  | -2.659  | -5.185  | C.ar | -0.0687 |
| 76 | C55  | 2.0358  | -1.3951 | -4.5941 | C.ar | -0.0686 |
| 77 | C56  | 0.8607  | -0.9914 | -3.9543 | C.ar | -0.0601 |
| 78 | H11A | -3.0279 | 2.201   | -3.1732 | H    | 0.0802  |
| 79 | H2   | -2.9872 | 1.4557  | -0.8041 | H    | 0.1884  |
| 80 | H12A | -4.7133 | 3.6076  | -4.2079 | H    | 0.0315  |
| 81 | H12B | -4.138  | 5.051   | -3.3492 | H    | 0.0315  |
| 82 | H13A | -1.9455 | 4.9383  | -4.5922 | H    | 0.0298  |
| 83 | H15B | -3.3456 | 2.6941  | -6.1892 | H    | 0.0232  |
| 84 | H15A | -1.8498 | 2.5206  | -5.228  | H    | 0.0232  |
| 85 | H15C | -1.8448 | 3.5269  | -6.6887 | H    | 0.0232  |
| 86 | H14C | -3.8263 | 6.4104  | -5.3242 | H    | 0.0232  |
| 87 | H14A | -2.9285 | 5.792   | -6.7366 | H    | 0.0232  |
| 88 | H14B | -4.5096 | 5.0736  | -6.2956 | H    | 0.0232  |
| 89 | H7A  | -5.3215 | 2.6779  | 0.6219  | H    | 0.0826  |
| 90 | H1   | -3.9171 | -0.6711 | -0.0655 | H    | 0.1856  |
| 91 | H8A  | -3.0317 | 0.9459  | 1.6821  | H    | 0.0639  |
| 92 | H9A  | -3.6419 | 3.9624  | 1.9733  | H    | 0.0257  |
| 93 | H9B  | -2.3744 | 3.0918  | 2.877   | H    | 0.0257  |

**Table S10. Continued**

|     |      |         |         |         |   |        |
|-----|------|---------|---------|---------|---|--------|
| 94  | H9C  | -2.2616 | 3.2335  | 1.1     | H | 0.0257 |
| 95  | H4   | -4.1287 | 1.4707  | 3.7286  | H | 0.2101 |
| 96  | H3A  | -6.79   | -1.5904 | -0.0868 | H | 0.0582 |
| 97  | H2A  | -6.3445 | -2.7896 | -2.1313 | H | 0.0574 |
| 98  | H4B  | -4.2148 | -3.2456 | 0.2982  | H | 0.0253 |
| 99  | H4C  | -5.8872 | -3.8675 | 0.2386  | H | 0.0253 |
| 100 | H4A  | -5.377  | -2.7838 | 1.5679  | H | 0.0253 |
| 101 | H5B  | -5.3047 | 0.1111  | -2.4509 | H | 0.0258 |
| 102 | H5A  | -6.0364 | -0.9031 | -3.7227 | H | 0.0258 |
| 103 | H5C  | -7.0299 | -0.3548 | -2.3428 | H | 0.0258 |
| 104 | H16A | -2.9771 | 5.4345  | -1.322  | H | 0.0488 |
| 105 | H16C | -1.4302 | 5.8516  | -2.0802 | H | 0.0488 |
| 106 | H16B | -1.4889 | 5.0031  | -0.5022 | H | 0.0488 |
| 107 | H18A | 0.7152  | 4.7285  | -2.3767 | H | 0.0619 |
| 108 | H19B | 2.0742  | 2.9189  | -3.3729 | H | 0.0448 |
| 109 | H19A | 1.6294  | 1.8038  | -2.0316 | H | 0.0448 |
| 110 | H21A | 2.2352  | 4.969   | 1.5979  | H | 0.0854 |
| 111 | H5   | 3.306   | 2.1585  | 1.4546  | H | 0.1896 |
| 112 | H22A | 0.0196  | 4.0265  | 2.0425  | H | 0.032  |
| 113 | H22B | 1.1592  | 3.5435  | 3.3226  | H | 0.032  |
| 114 | H23A | -0.3533 | 1.648   | 2.6304  | H | 0.0233 |
| 115 | H23C | 0.3081  | 1.7073  | 0.9767  | H | 0.0233 |
| 116 | H23B | 1.3472  | 1.2398  | 2.3573  | H | 0.0233 |
| 117 | H25A | 5.7517  | 2.9047  | 3.9456  | H | 0.0619 |
| 118 | H26A | 5.8492  | 2.3118  | 0.9042  | H | 0.0448 |
| 119 | H26B | 7.1773  | 2.9415  | 1.9371  | H | 0.0448 |
| 120 | H28A | 3.5386  | -0.8921 | 2.3557  | H | 0.088  |
| 121 | H29A | 3.2814  | -0.1832 | 4.6753  | H | 0.0485 |
| 122 | H29B | 4.639   | -1.1691 | 5.2076  | H | 0.0485 |
| 123 | H31A | 3.9798  | -3.7815 | 3.6184  | H | 0.0557 |
| 124 | H32A | 2.3968  | -5.5973 | 4.0504  | H | 0.0599 |
| 125 | H33A | 0.382   | -5.1998 | 5.4471  | H | 0.0559 |
| 126 | H34A | -0.043  | -2.9335 | 6.3736  | H | 0.0599 |
| 127 | H35A | 1.5291  | -1.096  | 5.9255  | H | 0.0557 |
| 128 | H36C | 7.3867  | -2.506  | 2.8844  | H | 0.0489 |
| 129 | H36B | 6.248   | -3.4324 | 3.8918  | H | 0.0489 |
| 130 | H36A | 6.6378  | -1.7313 | 4.2654  | H | 0.0489 |
| 131 | H38A | 4.2836  | -3.1832 | -0.4753 | H | 0.0802 |
| 132 | H39B | 5.8144  | -1.3822 | -1.1722 | H | 0.0313 |
| 133 | H39A | 5.1644  | -0.2917 | 0.0927  | H | 0.0313 |
| 134 | H40A | 3.9038  | 0.3608  | -1.9237 | H | 0.0287 |
| 135 | H40B | 3.6113  | -1.3734 | -2.294  | H | 0.0287 |
| 136 | H41B | 2.5069  | 0.1973  | 0.1186  | H | 0.0524 |
| 137 | H41A | 1.6115  | -0.8111 | -1.0843 | H | 0.0524 |
| 138 | H43A | 0.5575  | -1.0831 | 1.0949  | H | 0.0805 |
| 139 | H44A | 0.383   | -2.5122 | 3.1026  | H | 0.0343 |
| 140 | H46A | -1.365  | -0.8196 | 2.5392  | H | 0.0234 |

**Table S10.** Continued

|     |       |         |         |         |    |        |
|-----|-------|---------|---------|---------|----|--------|
| 141 | H46B  | -2.0425 | -2.2185 | 3.4025  | H  | 0.0234 |
| 142 | H46C  | -2.2845 | -2.0667 | 1.6469  | H  | 0.0234 |
| 143 | H45A  | -1.3366 | -4.4173 | 1.4004  | H  | 0.0234 |
| 144 | H45B  | 0.3017  | -4.8298 | 1.9846  | H  | 0.0234 |
| 145 | H45C  | -1.0129 | -4.5312 | 3.1421  | H  | 0.0234 |
| 146 | H49A  | -1.8791 | -3.2593 | -2.2185 | H  | 0.0918 |
| 147 | H47B  | 1.0876  | -4.3864 | -0.4477 | H  | 0.0488 |
| 148 | H47C  | 0.5143  | -3.7189 | -1.9709 | H  | 0.0488 |
| 149 | H47A  | -0.6084 | -4.5817 | -0.8695 | H  | 0.0488 |
| 150 | H50A  | -1.5576 | -0.3043 | -3.036  | H  | 0.048  |
| 151 | H50B  | -2.3623 | -1.5078 | -4.0521 | H  | 0.048  |
| 152 | H52A  | -1.0498 | -3.7405 | -4.554  | H  | 0.0557 |
| 153 | H53A  | 1.0547  | -4.4876 | -5.6173 | H  | 0.0599 |
| 154 | H54A  | 3.031   | -2.9823 | -5.663  | H  | 0.0559 |
| 155 | H55A  | 2.8899  | -0.7259 | -4.6339 | H  | 0.0599 |
| 156 | H56A  | 0.8264  | -0.0225 | -3.4731 | H  | 0.0557 |
| 157 | P5    | -6.1237 | -0.3823 | -2.8388 | Du | 0      |
| 158 | P4    | -5.1597 | -3.299  | 0.7016  | Du | 0      |
| 159 | P9    | -2.7593 | 3.4292  | 1.9834  | Du | 0      |
| 160 | P12   | -4.4256 | 4.3293  | -3.7786 | Du | 0      |
| 161 | P15   | -2.3467 | 2.9139  | -6.0353 | Du | 0      |
| 162 | P14   | -3.7548 | 5.7587  | -6.1188 | Du | 0      |
| 163 | P16   | -1.9654 | 5.4297  | -1.3015 | Du | 0      |
| 164 | P22   | 0.5894  | 3.785   | 2.6826  | Du | 0      |
| 165 | P23   | 0.434   | 1.5317  | 1.9882  | Du | 0      |
| 166 | P29   | 3.9602  | -0.6762 | 4.9415  | Du | 0      |
| 167 | P3135 | 2.7544  | -2.4387 | 4.7719  | Du | 0      |
| 168 | P36   | 6.7575  | -2.5566 | 3.6805  | Du | 0      |
| 169 | P39   | 5.4894  | -0.837  | -0.5398 | Du | 0      |
| 170 | P40   | 3.7575  | -0.5063 | -2.1089 | Du | 0      |
| 171 | P41   | 2.0592  | -0.3069 | -0.4829 | Du | 0      |
| 172 | P46   | -1.8973 | -1.7016 | 2.5295  | Du | 0      |
| 173 | P45   | -0.6826 | -4.5928 | 2.1757  | Du | 0      |
| 174 | P47   | 0.3311  | -4.229  | -1.096  | Du | 0      |
| 175 | P50   | -1.96   | -0.906  | -3.544  | Du | 0      |
| 176 | P19   | 1.8518  | 2.3613  | -2.7023 | Du | 0      |

<sup>a</sup>Atom nomenclature as in Figure 1a. <sup>b</sup>Pseudoatoms used in modeling are designated by “P” followed by the number of the relevant carbon atom(s). <sup>c</sup>Tripos forcefield atom type. <sup>d</sup>Gasteiger-Huckel charges.

**Table S11.** Atom coordinates for modeled grassypeptolide C (**3**) structure 7

| Atom number | Atom name <sup>a,b</sup> | x       | y       | z       | Atom type <sup>c</sup> | Charge <sup>d</sup> |
|-------------|--------------------------|---------|---------|---------|------------------------|---------------------|
| 1           | N5                       | -2.9829 | -1.9969 | 4.1826  | N.am                   | -0.2623             |
| 2           | C21                      | -2.4573 | -0.9092 | 5.0087  | C.3                    | 0.1158              |
| 3           | C20                      | -0.988  | -0.7572 | 4.7078  | C.2                    | 0.1014              |
| 4           | C22                      | -3.2666 | 0.3902  | 4.7536  | C.3                    | -0.013              |
| 5           | C23                      | -4.7485 | 0.2157  | 5.1748  | C.3                    | -0.0602             |
| 6           | N4                       | -0.5624 | 0.2403  | 4.0451  | N.2                    | -0.3321             |
| 7           | C18                      | 0.8746  | 0.1479  | 3.9087  | C.3                    | 0.1002              |
| 8           | C19                      | 1.2395  | -1.358  | 3.9803  | C.3                    | 0.043               |
| 9           | S1                       | 0.1516  | -1.9849 | 5.2859  | S.3                    | -0.0465             |
| 10          | C17                      | 1.418   | 0.8436  | 2.6817  | C.2                    | 0.1909              |
| 11          | N3                       | 1.4249  | 2.2056  | 2.5845  | N.am                   | -0.2542             |
| 12          | O6                       | 1.9082  | 0.1322  | 1.8183  | O.2                    | -0.3959             |
| 13          | C11                      | 2.2911  | 2.8049  | 1.5613  | C.3                    | 0.1336              |
| 14          | C10                      | 1.7929  | 4.1726  | 1.1447  | C.2                    | 0.2042              |
| 15          | C16                      | 0.8227  | 3.0151  | 3.6484  | C.3                    | 0.0254              |
| 16          | C12                      | 3.6919  | 2.8265  | 2.2442  | C.3                    | -0.0099             |
| 17          | C13                      | 4.9119  | 2.9927  | 1.2946  | C.3                    | -0.0425             |
| 18          | C15                      | 5.0162  | 1.8312  | 0.2674  | C.3                    | -0.0625             |
| 19          | C14                      | 4.9383  | 4.3701  | 0.5819  | C.3                    | -0.0625             |
| 20          | N2                       | 0.8209  | 4.2401  | 0.2033  | N.am                   | -0.2613             |
| 21          | O5                       | 2.2581  | 5.1608  | 1.6907  | O.2                    | -0.3944             |
| 22          | C7                       | 0.2067  | 5.5159  | -0.1664 | C.3                    | 0.1563              |
| 23          | C6                       | 0.5361  | 5.9149  | -1.5902 | C.2                    | 0.2046              |
| 24          | C8                       | -1.329  | 5.4324  | 0.0415  | C.3                    | 0.0924              |
| 25          | C9                       | -1.6784 | 4.9498  | 1.4763  | C.3                    | -0.0346             |
| 26          | O4                       | -1.9567 | 6.6956  | -0.2397 | O.3                    | -0.3874             |
| 27          | N1                       | 0.4738  | 5.0057  | -2.5971 | N.am                   | -0.2796             |
| 28          | O3                       | 0.8479  | 7.0806  | -1.781  | O.2                    | -0.3944             |
| 29          | C3                       | 0.8293  | 5.3786  | -3.9696 | C.3                    | 0.0598              |
| 30          | C2                       | 2.1994  | 4.7566  | -4.3673 | C.3                    | 0.08                |
| 31          | C1                       | 2.1206  | 3.2647  | -4.574  | C.2                    | 0.2415              |
| 32          | O1                       | 1.7507  | 2.5552  | -3.4973 | O.3                    | -0.2498             |
| 33          | C49                      | 1.8461  | 1.1248  | -3.6598 | C.3                    | 0.1852              |
| 34          | C4                       | -0.3023 | 4.9554  | -4.9426 | C.3                    | -0.0395             |
| 35          | C5                       | 3.2818  | 5.0645  | -3.2992 | C.3                    | -0.0418             |
| 36          | O2                       | 2.3804  | 2.7716  | -5.6614 | O.2                    | -0.3699             |
| 37          | C48                      | 1.1842  | 0.5096  | -2.4438 | C.2                    | 0.2166              |
| 38          | C50                      | 3.3266  | 0.6527  | -3.7408 | C.3                    | 0.0292              |
| 39          | C51                      | 3.3721  | -0.8824 | -3.6614 | C.ar                   | -0.0379             |
| 40          | C52                      | 3.8382  | -1.5318 | -2.5115 | C.ar                   | -0.0601             |
| 41          | C53                      | 3.8065  | -2.9267 | -2.4258 | C.ar                   | -0.0686             |
| 42          | C54                      | 3.3378  | -3.684  | -3.5022 | C.ar                   | -0.0687             |
| 43          | C55                      | 2.904   | -3.0434 | -4.6655 | C.ar                   | -0.0686             |
| 44          | C56                      | 2.9309  | -1.6481 | -4.7468 | C.ar                   | -0.0601             |
| 45          | N9                       | -0.1288 | 0.1433  | -2.4259 | N.am                   | -0.252              |
| 46          | O10                      | 1.9031  | 0.3279  | -1.4735 | O.2                    | -0.3933             |

**Table S11. Continued**

|    |      |         |         |         |      |         |
|----|------|---------|---------|---------|------|---------|
| 47 | C43  | -0.6413 | -0.5189 | -1.219  | C.3  | 0.1359  |
| 48 | C42  | -1.6963 | -1.5399 | -1.5857 | C.2  | 0.2068  |
| 49 | C47  | -0.9785 | 0.3705  | -3.6025 | C.3  | 0.0255  |
| 50 | C44  | -1.0533 | 0.5761  | -0.1896 | C.3  | -0.0061 |
| 51 | C45  | -1.5921 | -0.0032 | 1.1446  | C.3  | -0.0584 |
| 52 | C46  | -2.0417 | 1.6224  | -0.7737 | C.3  | -0.0584 |
| 53 | N8   | -1.3633 | -2.6716 | -2.2652 | N.am | -0.2498 |
| 54 | O9   | -2.847  | -1.3198 | -1.2465 | O.2  | -0.3942 |
| 55 | C38  | -2.3771 | -3.6598 | -2.6016 | C.3  | 0.134   |
| 56 | C39  | -1.515  | -4.9113 | -2.8979 | C.3  | -0.0104 |
| 57 | C40  | -0.2229 | -4.2867 | -3.4901 | C.3  | -0.0281 |
| 58 | C41  | 0.0038  | -2.9737 | -2.6906 | C.3  | 0.0369  |
| 59 | C37  | -3.6351 | -3.7546 | -1.739  | C.2  | 0.2073  |
| 60 | N7   | -3.8202 | -4.2312 | -0.4629 | N.am | -0.2484 |
| 61 | O8   | -4.6085 | -3.3129 | -2.3327 | O.2  | -0.3941 |
| 62 | C28  | -2.7381 | -4.7966 | 0.3706  | C.3  | 0.128   |
| 63 | C36  | -5.1922 | -4.1624 | 0.0718  | C.3  | 0.0266  |
| 64 | C27  | -3.2014 | -4.9544 | 1.8042  | C.2  | 0.1037  |
| 65 | N6   | -3.5242 | -3.8981 | 2.4342  | N.2  | -0.332  |
| 66 | C25  | -3.9256 | -4.2265 | 3.7824  | C.3  | 0.1001  |
| 67 | C26  | -3.3555 | -5.6216 | 4.1522  | C.3  | 0.043   |
| 68 | S2   | -3.2908 | -6.5405 | 2.5902  | S.3  | -0.0463 |
| 69 | C24  | -3.4393 | -3.1517 | 4.7261  | C.2  | 0.1895  |
| 70 | O7   | -3.4736 | -3.369  | 5.9267  | O.2  | -0.396  |
| 71 | C29  | -1.4399 | -3.9731 | 0.5694  | C.3  | 0.0238  |
| 72 | C30  | -0.4679 | -4.7089 | 1.5019  | C.ar | -0.0376 |
| 73 | C31  | 0.3478  | -5.7299 | 1.0012  | C.ar | -0.06   |
| 74 | C32  | 1.2027  | -6.4322 | 1.8555  | C.ar | -0.0686 |
| 75 | C33  | 1.2502  | -6.11   | 3.2146  | C.ar | -0.0687 |
| 76 | C34  | 0.4518  | -5.0779 | 3.7145  | C.ar | -0.0686 |
| 77 | C35  | -0.3927 | -4.3693 | 2.8554  | C.ar | -0.06   |
| 78 | H5   | -2.9779 | -1.873  | 3.1879  | H    | 0.1896  |
| 79 | H21A | -2.5156 | -1.1252 | 6.0865  | H    | 0.0854  |
| 80 | H22B | -3.2348 | 0.6482  | 3.6846  | H    | 0.032   |
| 81 | H22A | -2.8178 | 1.2213  | 5.3225  | H    | 0.032   |
| 82 | H23B | -4.8178 | -0.0288 | 6.2461  | H    | 0.0233  |
| 83 | H23A | -5.3058 | 1.1482  | 4.9918  | H    | 0.0233  |
| 84 | H23C | -5.2207 | -0.5937 | 4.5963  | H    | 0.0233  |
| 85 | H18A | 1.3513  | 0.6332  | 4.7733  | H    | 0.0619  |
| 86 | H19A | 2.3008  | -1.5358 | 4.2139  | H    | 0.0448  |
| 87 | H19B | 0.9795  | -1.8733 | 3.043   | H    | 0.0448  |
| 88 | H11A | 2.3092  | 2.1787  | 0.659   | H    | 0.0802  |
| 89 | H16A | 0.6943  | 4.0661  | 3.3617  | H    | 0.0488  |
| 90 | H16C | 1.4715  | 3.0013  | 4.5358  | H    | 0.0488  |
| 91 | H16B | -0.1772 | 2.6478  | 3.9129  | H    | 0.0488  |
| 92 | H12B | 3.7118  | 3.6105  | 3.0185  | H    | 0.0315  |
| 93 | H12A | 3.8465  | 1.8685  | 2.7683  | H    | 0.0315  |



**Table S11. Continued**

|     |      |         |         |         |   |        |
|-----|------|---------|---------|---------|---|--------|
| 94  | H13A | 5.8014  | 2.9378  | 1.9472  | H | 0.0298 |
| 95  | H15C | 4.8881  | 0.8587  | 0.7685  | H | 0.0232 |
| 96  | H15B | 4.2566  | 1.9238  | -0.5208 | H | 0.0232 |
| 97  | H15A | 6.0042  | 1.8464  | -0.2149 | H | 0.0232 |
| 98  | H14C | 4.8833  | 5.1858  | 1.3194  | H | 0.0232 |
| 99  | H14B | 4.0959  | 4.4631  | -0.1162 | H | 0.0232 |
| 100 | H14A | 5.8721  | 4.4816  | 0.01    | H | 0.0232 |
| 101 | H2   | 0.4639  | 3.4105  | -0.2228 | H | 0.1884 |
| 102 | H7A  | 0.5757  | 6.3267  | 0.4812  | H | 0.0826 |
| 103 | H8A  | -1.7436 | 4.7189  | -0.6846 | H | 0.0639 |
| 104 | H9B  | -1.287  | 3.9381  | 1.6634  | H | 0.0257 |
| 105 | H9A  | -1.25   | 5.6321  | 2.226   | H | 0.0257 |
| 106 | H9C  | -2.7708 | 4.9253  | 1.6073  | H | 0.0257 |
| 107 | H4   | -1.6725 | 7.3866  | 0.349   | H | 0.2101 |
| 108 | H1   | 0.2182  | 4.051   | -2.4367 | H | 0.1856 |
| 109 | H3A  | 0.9536  | 6.4709  | -4.0712 | H | 0.0582 |
| 110 | H2A  | 2.5228  | 5.2119  | -5.3203 | H | 0.0574 |
| 111 | H49A | 1.3474  | 0.7864  | -4.5797 | H | 0.0918 |
| 112 | H4C  | -0.0403 | 5.219   | -5.979  | H | 0.0253 |
| 113 | H4B  | -0.4826 | 3.8717  | -4.8895 | H | 0.0253 |
| 114 | H4A  | -1.2341 | 5.4749  | -4.6704 | H | 0.0253 |
| 115 | H5C  | 3.3755  | 6.1509  | -3.1466 | H | 0.0258 |
| 116 | H5A  | 3.0189  | 4.5961  | -2.3394 | H | 0.0258 |
| 117 | H5B  | 4.2583  | 4.6696  | -3.6215 | H | 0.0258 |
| 118 | H50A | 3.9022  | 1.1082  | -2.9208 | H | 0.048  |
| 119 | H50B | 3.8018  | 0.9645  | -4.6834 | H | 0.048  |
| 120 | H52A | 4.225   | -0.9589 | -1.6747 | H | 0.0557 |
| 121 | H53A | 4.1465  | -3.4224 | -1.5217 | H | 0.0599 |
| 122 | H54A | 3.3125  | -4.7674 | -3.435  | H | 0.0559 |
| 123 | H55A | 2.5447  | -3.6299 | -5.5055 | H | 0.0599 |
| 124 | H56A | 2.6035  | -1.1608 | -5.6596 | H | 0.0557 |
| 125 | H43A | 0.1392  | -1.11   | -0.7149 | H | 0.0805 |
| 126 | H47A | -2.0451 | 0.2497  | -3.3665 | H | 0.0488 |
| 127 | H47B | -0.8612 | 1.398   | -3.9786 | H | 0.0488 |
| 128 | H47C | -0.7388 | -0.3416 | -4.4055 | H | 0.0488 |
| 129 | H44A | -0.1244 | 1.1046  | 0.0793  | H | 0.0343 |
| 130 | H45C | -1.6964 | 0.8223  | 1.863   | H | 0.0234 |
| 131 | H45A | -0.8873 | -0.7375 | 1.5614  | H | 0.0234 |
| 132 | H45B | -2.5764 | -0.4766 | 1.0248  | H | 0.0234 |
| 133 | H46C | -2.963  | 1.1461  | -1.136  | H | 0.0234 |
| 134 | H46A | -2.3227 | 2.3492  | 0.0012  | H | 0.0234 |
| 135 | H46B | -1.5781 | 2.1757  | -1.6034 | H | 0.0234 |
| 136 | H38A | -2.7024 | -3.3318 | -3.6038 | H | 0.0802 |
| 137 | H39A | -1.2613 | -5.4654 | -1.9871 | H | 0.0313 |
| 138 | H39B | -2.0057 | -5.612  | -3.5943 | H | 0.0313 |
| 139 | H40B | -0.4114 | -4.0341 | -4.5477 | H | 0.0287 |
| 140 | H40A | 0.638   | -4.9732 | -3.4463 | H | 0.0287 |

**Table S11.** Continued

|     |       |         |         |         |    |        |
|-----|-------|---------|---------|---------|----|--------|
| 141 | H41A  | 0.6806  | -3.1589 | -1.8431 | H  | 0.0524 |
| 142 | H41B  | 0.44    | -2.1941 | -3.3296 | H  | 0.0524 |
| 143 | H28A  | -2.4986 | -5.8    | -0.011  | H  | 0.088  |
| 144 | H36A  | -5.9761 | -4.2043 | -0.6985 | H  | 0.0489 |
| 145 | H36C  | -5.4128 | -5.0069 | 0.7405  | H  | 0.0489 |
| 146 | H36B  | -5.3074 | -3.2217 | 0.6308  | H  | 0.0489 |
| 147 | H25A  | -5.0282 | -4.2499 | 3.7973  | H  | 0.0619 |
| 148 | H26B  | -2.3226 | -5.5358 | 4.5212  | H  | 0.0448 |
| 149 | H26A  | -3.9651 | -6.1436 | 4.9059  | H  | 0.0448 |
| 150 | H29A  | -1.6753 | -2.9647 | 0.9362  | H  | 0.0485 |
| 151 | H29B  | -0.8879 | -3.8645 | -0.3518 | H  | 0.0485 |
| 152 | H31A  | 0.3187  | -5.9803 | -0.055  | H  | 0.0557 |
| 153 | H32A  | 1.8288  | -7.2279 | 1.4639  | H  | 0.0599 |
| 154 | H33A  | 1.9068  | -6.6604 | 3.8812  | H  | 0.0559 |
| 155 | H34A  | 0.488   | -4.8312 | 4.7704  | H  | 0.0599 |
| 156 | H35A  | -0.9965 | -3.555  | 3.2364  | H  | 0.0557 |
| 157 | P5    | 3.5509  | 5.1389  | -3.0358 | Du | 0      |
| 158 | P4    | -0.5857 | 4.8552  | -5.1797 | Du | 0      |
| 159 | P9    | -1.7692 | 4.8318  | 1.8323  | Du | 0      |
| 160 | P12   | 3.7791  | 2.7395  | 2.8934  | Du | 0      |
| 161 | P14   | 4.9504  | 4.7102  | 0.4044  | Du | 0      |
| 162 | P15   | 5.0496  | 1.543   | 0.0109  | Du | 0      |
| 163 | P16   | 0.6629  | 3.2384  | 3.9368  | Du | 0      |
| 164 | P22   | -3.0263 | 0.9348  | 4.5035  | Du | 0      |
| 165 | P23   | -5.1148 | 0.1752  | 5.2781  | Du | 0      |
| 166 | P29   | -1.2816 | -3.4146 | 0.2922  | Du | 0      |
| 167 | P3135 | -0.3389 | -4.7676 | 1.5907  | Du | 0      |
| 168 | P36   | -5.5654 | -4.1443 | 0.2243  | Du | 0      |
| 169 | P39   | -1.6335 | -5.5387 | -2.7907 | Du | 0      |
| 170 | P40   | 0.1133  | -4.5036 | -3.997  | Du | 0      |
| 171 | P41   | 0.5603  | -2.6765 | -2.5863 | Du | 0      |
| 172 | P45   | -1.72   | -0.1306 | 1.4831  | Du | 0      |
| 173 | P46   | -2.288  | 1.8903  | -0.9128 | Du | 0      |
| 174 | P47   | -1.2151 | 0.4354  | -3.9169 | Du | 0      |
| 175 | P50   | 3.852   | 1.0363  | -3.8021 | Du | 0      |
| 176 | P19   | 1.6402  | -1.7046 | 3.6285  | Du | 0      |

<sup>a</sup>Atom nomenclature as in Figure 1a. <sup>b</sup>Pseudoatoms used in modeling are designated by “P” followed by the number of the relevant carbon atom(s). <sup>c</sup>Tripos forcefield atom type. <sup>d</sup>Gasteiger-Huckel charges.

**Table S12.** Atom coordinates for modeled grassypeptolide C (**3**) structure 8

| Atom number | Atom name <sup>a,b</sup> | x       | y       | z       | Atom type <sup>c</sup> | Charge <sup>d</sup> |
|-------------|--------------------------|---------|---------|---------|------------------------|---------------------|
| 1           | C3                       | 5.4197  | 2.4264  | 2.4965  | C.3                    | 0.0598              |
| 2           | C2                       | 5.3682  | 1.6122  | 3.825   | C.3                    | 0.08                |
| 3           | N1                       | 4.0555  | 2.7757  | 2.0848  | N.am                   | -0.2796             |
| 4           | C1                       | 4.7777  | 0.2382  | 3.6304  | C.2                    | 0.2415              |
| 5           | C4                       | 6.1471  | 1.6654  | 1.3544  | C.3                    | -0.0395             |
| 6           | C5                       | 4.527   | 2.3629  | 4.8916  | C.3                    | -0.0418             |
| 7           | O1                       | 3.8196  | 0.1794  | 2.6969  | O.3                    | -0.2498             |
| 8           | O2                       | 5.1741  | -0.7211 | 4.2742  | O.2                    | -0.3699             |
| 9           | C49                      | 3.177   | -1.0988 | 2.5268  | C.3                    | 0.1852              |
| 10          | C48                      | 2.4477  | -0.9245 | 1.2086  | C.2                    | 0.2166              |
| 11          | C50                      | 2.2051  | -1.3367 | 3.7123  | C.3                    | 0.0292              |
| 12          | C51                      | 1.3183  | -2.5669 | 3.4818  | C.ar                   | -0.0379             |
| 13          | C52                      | -0.0621 | -2.4272 | 3.301   | C.ar                   | -0.0601             |
| 14          | C53                      | -0.875  | -3.553  | 3.1458  | C.ar                   | -0.0686             |
| 15          | C54                      | -0.3056 | -4.8291 | 3.1431  | C.ar                   | -0.0687             |
| 16          | C55                      | 1.0771  | -4.9735 | 3.2844  | C.ar                   | -0.0686             |
| 17          | C56                      | 1.8841  | -3.8465 | 3.4641  | C.ar                   | -0.0601             |
| 18          | N9                       | 2.65    | -1.699  | 0.0988  | N.am                   | -0.252              |
| 19          | O10                      | 1.6758  | 0.0215  | 1.1892  | O.2                    | -0.3933             |
| 20          | C47                      | 3.5805  | -2.8317 | 0.1486  | C.3                    | 0.0255              |
| 21          | C43                      | 1.9826  | -1.3124 | -1.1563 | C.3                    | 0.1359              |
| 22          | C42                      | 1.5286  | -2.5201 | -1.9589 | C.2                    | 0.2068              |
| 23          | C44                      | 2.8605  | -0.3143 | -1.9887 | C.3                    | -0.0061             |
| 24          | C46                      | 2.9264  | 1.0918  | -1.3291 | C.3                    | -0.0584             |
| 25          | C45                      | 4.3058  | -0.8159 | -2.261  | C.3                    | -0.0584             |
| 26          | N8                       | 0.5261  | -3.3232 | -1.5224 | N.am                   | -0.2498             |
| 27          | O9                       | 2.0592  | -2.7382 | -3.036  | O.2                    | -0.3942             |
| 28          | C38                      | 0.1082  | -4.4694 | -2.3191 | C.3                    | 0.134               |
| 29          | C39                      | -1.1116 | -4.9763 | -1.5097 | C.3                    | -0.0104             |
| 30          | C40                      | -0.7996 | -4.5111 | -0.0693 | C.3                    | -0.0281             |
| 31          | C41                      | -0.1483 | -3.1171 | -0.2453 | C.3                    | 0.0369              |
| 32          | C37                      | -0.2169 | -4.3218 | -3.7993 | C.2                    | 0.2073              |
| 33          | N7                       | -0.9487 | -3.3371 | -4.4034 | N.am                   | -0.2484             |
| 34          | O8                       | 0.2017  | -5.2445 | -4.4824 | O.2                    | -0.3941             |
| 35          | C36                      | -1.1758 | -3.4758 | -5.8448 | C.3                    | 0.0266              |
| 36          | C28                      | -1.4941 | -2.1909 | -3.6672 | C.3                    | 0.128               |
| 37          | C27                      | -2.9652 | -2.0524 | -3.9629 | C.2                    | 0.1037              |
| 38          | C29                      | -0.7177 | -0.8582 | -3.8913 | C.3                    | 0.0238              |
| 39          | C30                      | -0.3635 | -0.5741 | -5.3563 | C.ar                   | -0.0376             |
| 40          | C35                      | 0.8037  | -1.1079 | -5.9166 | C.ar                   | -0.06               |
| 41          | C34                      | 1.107   | -0.8868 | -7.2629 | C.ar                   | -0.0686             |
| 42          | C33                      | 0.2514  | -0.1173 | -8.0555 | C.ar                   | -0.0687             |
| 43          | C32                      | -0.8982 | 0.4446  | -7.4939 | C.ar                   | -0.0686             |
| 44          | C31                      | -1.1942 | 0.2289  | -6.145  | C.ar                   | -0.06               |
| 45          | S2                       | -4.0603 | -3.4332 | -3.8007 | S.3                    | -0.0463             |
| 46          | C26                      | -5.3548 | -2.1833 | -3.5869 | C.3                    | 0.043               |

**Table S12. Continued**

|    |      |         |         |         |      |         |
|----|------|---------|---------|---------|------|---------|
| 47 | C25  | -4.851  | -0.9368 | -4.3619 | C.3  | 0.1001  |
| 48 | N6   | -3.4091 | -0.9144 | -4.3053 | N.2  | -0.332  |
| 49 | C24  | -5.286  | 0.3322  | -3.6708 | C.2  | 0.1895  |
| 50 | N5   | -4.4493 | 0.7824  | -2.7055 | N.am | -0.2623 |
| 51 | O7   | -6.3286 | 0.8784  | -3.9939 | O.2  | -0.396  |
| 52 | C21  | -4.6968 | 2.0154  | -1.9671 | C.3  | 0.1158  |
| 53 | C20  | -4.6495 | 1.6459  | -0.5089 | C.2  | 0.1014  |
| 54 | C22  | -3.61   | 3.0588  | -2.3466 | C.3  | -0.013  |
| 55 | C23  | -3.673  | 3.4099  | -3.8556 | C.3  | -0.0602 |
| 56 | S1   | -5.9217 | 0.6297  | 0.1879  | S.3  | -0.0465 |
| 57 | C19  | -4.6913 | 0.2741  | 1.4695  | C.3  | 0.043   |
| 58 | C18  | -3.8507 | 1.5768  | 1.5614  | C.3  | 0.1002  |
| 59 | N4   | -3.6838 | 2.0533  | 0.2086  | N.2  | -0.3321 |
| 60 | C17  | -2.515  | 1.3879  | 2.251   | C.2  | 0.1909  |
| 61 | N3   | -1.671  | 2.432   | 2.4958  | N.am | -0.2542 |
| 62 | O6   | -2.2355 | 0.2503  | 2.5924  | O.2  | -0.3959 |
| 63 | C11  | -0.4355 | 2.1544  | 3.2512  | C.3  | 0.1336  |
| 64 | C10  | 0.6004  | 3.2499  | 3.0966  | C.2  | 0.2042  |
| 65 | C16  | -2.0587 | 3.7823  | 2.062   | C.3  | 0.0254  |
| 66 | C12  | -0.7483 | 1.7954  | 4.7393  | C.3  | -0.0099 |
| 67 | C13  | -1.9266 | 2.5725  | 5.409   | C.3  | -0.0425 |
| 68 | C15  | -2.2868 | 1.9075  | 6.7674  | C.3  | -0.0625 |
| 69 | C14  | -1.623  | 4.0771  | 5.6492  | C.3  | -0.0625 |
| 70 | N2   | 1.2892  | 3.3265  | 1.9305  | N.am | -0.2613 |
| 71 | O5   | 0.7494  | 4.0578  | 3.9986  | O.2  | -0.3944 |
| 72 | C7   | 2.2212  | 4.4287  | 1.6783  | C.3  | 0.1563  |
| 73 | C6   | 3.6557  | 4.069   | 2.0066  | C.2  | 0.2046  |
| 74 | C8   | 2.0821  | 4.9517  | 0.2207  | C.3  | 0.0924  |
| 75 | O4   | 2.8371  | 6.1636  | 0.037   | O.3  | -0.3874 |
| 76 | C9   | 0.6014  | 5.2647  | -0.121  | C.3  | -0.0346 |
| 77 | O3   | 4.4184  | 5.0011  | 2.2107  | O.2  | -0.3944 |
| 78 | H3A  | 6.0271  | 3.3264  | 2.6963  | H    | 0.0582  |
| 79 | H2A  | 6.3991  | 1.4909  | 4.2012  | H    | 0.0574  |
| 80 | H1   | 3.4235  | 2.0199  | 1.9158  | H    | 0.1856  |
| 81 | H4B  | 6.1948  | 2.3082  | 0.4616  | H    | 0.0253  |
| 82 | H4C  | 5.6264  | 0.7378  | 1.0772  | H    | 0.0253  |
| 83 | H4A  | 7.1738  | 1.4096  | 1.659   | H    | 0.0253  |
| 84 | H5C  | 3.4748  | 2.4462  | 4.5772  | H    | 0.0258  |
| 85 | H5B  | 4.9281  | 3.3754  | 5.0537  | H    | 0.0258  |
| 86 | H5A  | 4.5589  | 1.8174  | 5.8478  | H    | 0.0258  |
| 87 | H49A | 3.9222  | -1.9043 | 2.4982  | H    | 0.0918  |
| 88 | H50B | 1.5931  | -0.4339 | 3.8581  | H    | 0.048   |
| 89 | H50A | 2.7666  | -1.501  | 4.6448  | H    | 0.048   |
| 90 | H52A | -0.5115 | -1.4427 | 3.2829  | H    | 0.0557  |
| 91 | H53A | -1.9476 | -3.4353 | 3.0269  | H    | 0.0599  |
| 92 | H54A | -0.9357 | -5.7057 | 3.0291  | H    | 0.0559  |
| 93 | H55A | 1.5243  | -5.9622 | 3.2568  | H    | 0.0599  |

**Table S12. Continued**

|     |      |         |         |         |   |        |
|-----|------|---------|---------|---------|---|--------|
| 94  | H56A | 2.9541  | -3.9711 | 3.5946  | H | 0.0557 |
| 95  | H47C | 3.2421  | -3.5602 | 0.9002  | H | 0.0488 |
| 96  | H47B | 3.6334  | -3.3666 | -0.8097 | H | 0.0488 |
| 97  | H47A | 4.6031  | -2.5049 | 0.3874  | H | 0.0488 |
| 98  | H43A | 1.0332  | -0.7906 | -0.9558 | H | 0.0805 |
| 99  | H44A | 2.3886  | -0.1635 | -2.9737 | H | 0.0343 |
| 100 | H46C | 3.4729  | 1.0438  | -0.3781 | H | 0.0234 |
| 101 | H46A | 1.9161  | 1.4872  | -1.1426 | H | 0.0234 |
| 102 | H46B | 3.4532  | 1.8003  | -1.9872 | H | 0.0234 |
| 103 | H45B | 4.8128  | -0.1302 | -2.9583 | H | 0.0234 |
| 104 | H45C | 4.8884  | -0.8392 | -1.3304 | H | 0.0234 |
| 105 | H45A | 4.3149  | -1.8176 | -2.7128 | H | 0.0234 |
| 106 | H38A | 0.9252  | -5.201  | -2.2075 | H | 0.0802 |
| 107 | H39B | -2.0421 | -4.4958 | -1.8462 | H | 0.0313 |
| 108 | H39A | -1.2454 | -6.0682 | -1.5853 | H | 0.0313 |
| 109 | H40A | -0.0585 | -5.2058 | 0.3614  | H | 0.0287 |
| 110 | H40B | -1.6942 | -4.4951 | 0.5736  | H | 0.0287 |
| 111 | H41B | -0.9086 | -2.3238 | -0.31   | H | 0.0524 |
| 112 | H41A | 0.5324  | -2.9097 | 0.5916  | H | 0.0524 |
| 113 | H36C | -1.7634 | -4.3881 | -6.0305 | H | 0.0489 |
| 114 | H36A | -0.2224 | -3.558  | -6.3882 | H | 0.0489 |
| 115 | H36B | -1.7419 | -2.6312 | -6.2633 | H | 0.0489 |
| 116 | H28A | -1.4997 | -2.3583 | -2.5871 | H | 0.088  |
| 117 | H29A | 0.2271  | -0.9066 | -3.3529 | H | 0.0485 |
| 118 | H29B | -1.2586 | -0.0033 | -3.4562 | H | 0.0485 |
| 119 | H35A | 1.4822  | -1.7013 | -5.3113 | H | 0.0557 |
| 120 | H34A | 2.0074  | -1.314  | -7.6934 | H | 0.0599 |
| 121 | H33A | 0.4799  | 0.0448  | -9.1043 | H | 0.0559 |
| 122 | H32A | -1.5607 | 1.0498  | -8.1049 | H | 0.0599 |
| 123 | H31A | -2.0722 | 0.6923  | -5.7122 | H | 0.0557 |
| 124 | H26A | -5.4166 | -1.9754 | -2.5066 | H | 0.0448 |
| 125 | H26B | -6.3329 | -2.5388 | -3.9456 | H | 0.0448 |
| 126 | H25A | -5.1581 | -0.9557 | -5.4202 | H | 0.0619 |
| 127 | H5   | -3.6076 | 0.2817  | -2.4924 | H | 0.1896 |
| 128 | H21A | -5.6841 | 2.4547  | -2.1784 | H | 0.0854 |
| 129 | H22B | -2.6097 | 2.6558  | -2.1158 | H | 0.032  |
| 130 | H22A | -3.7581 | 3.9765  | -1.7527 | H | 0.032  |
| 131 | H23B | -2.9032 | 4.1583  | -4.1019 | H | 0.0233 |
| 132 | H23A | -4.6602 | 3.8242  | -4.1126 | H | 0.0233 |
| 133 | H23C | -3.4961 | 2.5137  | -4.4694 | H | 0.0233 |
| 134 | H19B | -5.162  | -0.002  | 2.4258  | H | 0.0448 |
| 135 | H19A | -4.0829 | -0.5673 | 1.1012  | H | 0.0448 |
| 136 | H18A | -4.4428 | 2.3224  | 2.1139  | H | 0.0619 |
| 137 | H11A | 0.0553  | 1.2718  | 2.8094  | H | 0.0802 |
| 138 | H16A | -2.2276 | 3.8088  | 0.9774  | H | 0.0488 |
| 139 | H16B | -2.9756 | 4.1038  | 2.5761  | H | 0.0488 |
| 140 | H16C | -1.3004 | 4.5471  | 2.2698  | H | 0.0488 |

**Table S12.** Continued

|     |       |         |         |         |    |        |
|-----|-------|---------|---------|---------|----|--------|
| 141 | H12B  | 0.1653  | 1.8946  | 5.3473  | H  | 0.0315 |
| 142 | H12A  | -1.0266 | 0.7289  | 4.7658  | H  | 0.0315 |
| 143 | H13A  | -2.8262 | 2.4957  | 4.7765  | H  | 0.0298 |
| 144 | H15B  | -3.1357 | 2.4258  | 7.2401  | H  | 0.0232 |
| 145 | H15C  | -1.424  | 1.9489  | 7.449   | H  | 0.0232 |
| 146 | H15A  | -2.5733 | 0.8541  | 6.6228  | H  | 0.0232 |
| 147 | H14A  | -1.5175 | 4.6215  | 4.7031  | H  | 0.0232 |
| 148 | H14C  | -2.4469 | 4.5518  | 6.204   | H  | 0.0232 |
| 149 | H14B  | -0.6994 | 4.1927  | 6.2364  | H  | 0.0232 |
| 150 | H2    | 1.1537  | 2.6523  | 1.2009  | H  | 0.1884 |
| 151 | H7A   | 2.0016  | 5.268   | 2.3579  | H  | 0.0826 |
| 152 | H8A   | 2.4452  | 4.1847  | -0.4834 | H  | 0.0639 |
| 153 | H4    | 3.77    | 6.0481  | 0.1861  | H  | 0.2101 |
| 154 | H9C   | 0.5354  | 5.714   | -1.1235 | H  | 0.0257 |
| 155 | H9A   | -0.012  | 4.3514  | -0.1194 | H  | 0.0257 |
| 156 | H9B   | 0.184   | 5.9747  | 0.6093  | H  | 0.0257 |
| 157 | P5    | 4.3206  | 2.5463  | 5.1596  | Du | 0      |
| 158 | P4    | 6.3317  | 1.4852  | 1.0659  | Du | 0      |
| 159 | P9    | 0.2358  | 5.3467  | -0.2112 | Du | 0      |
| 160 | P12   | -0.4307 | 1.3117  | 5.0566  | Du | 0      |
| 161 | P15   | -2.3777 | 1.7429  | 7.104   | Du | 0      |
| 162 | P14   | -1.5546 | 4.4553  | 5.7145  | Du | 0      |
| 163 | P16   | -2.1679 | 4.1532  | 1.9411  | Du | 0      |
| 164 | P22   | -3.1839 | 3.3161  | -1.9343 | Du | 0      |
| 165 | P23   | -3.6865 | 3.4987  | -4.228  | Du | 0      |
| 166 | P29   | -0.5158 | -0.4549 | -3.4046 | Du | 0      |
| 167 | P3135 | -0.295  | -0.5045 | -5.5117 | Du | 0      |
| 168 | P36   | -1.2426 | -3.5257 | -6.2273 | Du | 0      |
| 169 | P39   | -1.6438 | -5.282  | -1.7158 | Du | 0      |
| 170 | P40   | -0.8764 | -4.8504 | 0.4675  | Du | 0      |
| 171 | P41   | -0.1881 | -2.6168 | 0.1408  | Du | 0      |
| 172 | P45   | 4.672   | -0.929  | -2.3338 | Du | 0      |
| 173 | P46   | 2.9474  | 1.4438  | -1.1693 | Du | 0      |
| 174 | P47   | 3.8262  | -3.1439 | 0.1593  | Du | 0      |
| 175 | P50   | 2.1799  | -0.9675 | 4.2514  | Du | 0      |
| 176 | P19   | -4.6225 | -0.2846 | 1.7635  | Du | 0      |

<sup>a</sup>Atom nomenclature as in Figure 1a. <sup>b</sup>Pseudoatoms used in modeling are designated by “P” followed by the number of the relevant carbon atom(s). <sup>c</sup>Tripos forcefield atom type. <sup>d</sup>Gasteiger-Huckel charges.

**Table S13.** Atom coordinates for modeled grassypeptolide C (**3**) structure 9

| Atom number | Atom name <sup>a,b</sup> | x       | y       | z       | Atom type <sup>c</sup> | Charge <sup>d</sup> |
|-------------|--------------------------|---------|---------|---------|------------------------|---------------------|
| 1           | N2                       | -0.0735 | 3.3824  | 2.9465  | N.am                   | -0.2613             |
| 2           | C7                       | 0.5318  | 3.4135  | 4.2771  | C.3                    | 0.1563              |
| 3           | C6                       | -0.2392 | 2.466   | 5.1731  | C.2                    | 0.2046              |
| 4           | C8                       | 2.038   | 3.0321  | 4.2308  | C.3                    | 0.0924              |
| 5           | O4                       | 2.6239  | 3.1307  | 5.5402  | O.3                    | -0.3874             |
| 6           | C9                       | 2.8132  | 3.9097  | 3.2125  | C.3                    | -0.0346             |
| 7           | N1                       | -0.4508 | 1.1967  | 4.7485  | N.am                   | -0.2796             |
| 8           | O3                       | -0.6597 | 2.8841  | 6.2409  | O.2                    | -0.3944             |
| 9           | C3                       | -1.3526 | 0.2914  | 5.4611  | C.3                    | 0.0598              |
| 10          | C2                       | -2.7329 | 0.299   | 4.7369  | C.3                    | 0.08                |
| 11          | C1                       | -2.5786 | 0.1099  | 3.2433  | C.2                    | 0.2415              |
| 12          | C4                       | -0.7546 | -1.1382 | 5.5096  | C.3                    | -0.0395             |
| 13          | C5                       | -3.4725 | 1.6441  | 4.9759  | C.3                    | -0.0418             |
| 14          | O1                       | -3.1967 | -0.9497 | 2.705   | O.3                    | -0.2498             |
| 15          | O2                       | -1.9203 | 0.9027  | 2.5914  | O.2                    | -0.3699             |
| 16          | C49                      | -3.218  | -0.9809 | 1.2585  | C.3                    | 0.1852              |
| 17          | C48                      | -1.8581 | -0.9608 | 0.5784  | C.2                    | 0.2166              |
| 18          | N9                       | -0.9581 | -1.9802 | 0.6912  | N.am                   | -0.252              |
| 19          | C50                      | -4.1618 | 0.1301  | 0.7063  | C.3                    | 0.0292              |
| 20          | C51                      | -5.4796 | 0.1942  | 1.4936  | C.ar                   | -0.0379             |
| 21          | C56                      | -5.8345 | 1.3506  | 2.1994  | C.ar                   | -0.0601             |
| 22          | C55                      | -7.0065 | 1.3847  | 2.9605  | C.ar                   | -0.0686             |
| 23          | C54                      | -7.8453 | 0.2682  | 3.004   | C.ar                   | -0.0687             |
| 24          | C53                      | -7.5159 | -0.8761 | 2.2726  | C.ar                   | -0.0686             |
| 25          | C52                      | -6.3441 | -0.9066 | 1.5113  | C.ar                   | -0.0601             |
| 26          | O10                      | -1.6136 | 0.0191  | -0.1077 | O.2                    | -0.3933             |
| 27          | C43                      | 0.2853  | -1.914  | -0.0956 | C.3                    | 0.1359              |
| 28          | C42                      | 0.6282  | -3.287  | -0.6358 | C.2                    | 0.2068              |
| 29          | C47                      | -1.2786 | -3.1445 | 1.5221  | C.3                    | 0.0255              |
| 30          | C44                      | 1.4676  | -1.2304 | 0.6655  | C.3                    | -0.0061             |
| 31          | C46                      | 1.1885  | 0.2871  | 0.8495  | C.3                    | -0.0584             |
| 32          | C45                      | 1.7719  | -1.855  | 2.0567  | C.3                    | -0.0584             |
| 33          | N8                       | -0.0516 | -3.8407 | -1.6763 | N.am                   | -0.2498             |
| 34          | O9                       | 1.5649  | -3.8801 | -0.1298 | O.2                    | -0.3942             |
| 35          | C41                      | -1.1788 | -3.1686 | -2.3125 | C.3                    | 0.0369              |
| 36          | C40                      | -1.8352 | -4.3812 | -3.0177 | C.3                    | -0.0281             |
| 37          | C39                      | -1.232  | -5.5887 | -2.2585 | C.3                    | -0.0104             |
| 38          | C38                      | 0.2665  | -5.1931 | -2.1282 | C.3                    | 0.134               |
| 39          | C37                      | 0.9801  | -5.3752 | -3.4687 | C.2                    | 0.2073              |
| 40          | N7                       | 2.0481  | -4.6949 | -3.9905 | N.am                   | -0.2484             |
| 41          | O8                       | 0.5176  | -6.2823 | -4.1438 | O.2                    | -0.3941             |
| 42          | C36                      | 2.5264  | -5.1281 | -5.3094 | C.3                    | 0.0266              |
| 43          | C28                      | 2.7092  | -3.578  | -3.3089 | C.3                    | 0.128               |
| 44          | C27                      | 2.8056  | -2.4422 | -4.2952 | C.2                    | 0.1037              |
| 45          | C29                      | 4.0966  | -3.9766 | -2.7329 | C.3                    | 0.0238              |
| 46          | C30                      | 3.9479  | -4.9101 | -1.5232 | C.ar                   | -0.0376             |

**Table S13. Continued**

|    |     |         |         |         |      |         |
|----|-----|---------|---------|---------|------|---------|
| 47 | C35 | 4.1965  | -4.4468 | -0.2248 | C.ar | -0.06   |
| 48 | C34 | 4.0126  | -5.291  | 0.8742  | C.ar | -0.0686 |
| 49 | C33 | 3.5871  | -6.6078 | 0.6814  | C.ar | -0.0687 |
| 50 | C32 | 3.3665  | -7.0843 | -0.6136 | C.ar | -0.0686 |
| 51 | C31 | 3.5614  | -6.2415 | -1.7113 | C.ar | -0.06   |
| 52 | N6  | 3.9398  | -1.9383 | -4.5721 | N.2  | -0.332  |
| 53 | C25 | 3.7822  | -0.8745 | -5.5376 | C.3  | 0.1001  |
| 54 | C26 | 2.4288  | -1.0719 | -6.2695 | C.3  | 0.043   |
| 55 | S2  | 1.3254  | -1.8174 | -5.0444 | S.3  | -0.0463 |
| 56 | C24 | 3.845   | 0.4725  | -4.8528 | C.2  | 0.1895  |
| 57 | N5  | 3.2809  | 0.6161  | -3.6296 | N.am | -0.2623 |
| 58 | O7  | 4.3994  | 1.3877  | -5.4411 | O.2  | -0.396  |
| 59 | C21 | 3.2367  | 1.9127  | -2.9568 | C.3  | 0.1158  |
| 60 | C20 | 1.7932  | 2.3424  | -2.9461 | C.2  | 0.1014  |
| 61 | C22 | 3.8567  | 1.7932  | -1.5392 | C.3  | -0.013  |
| 62 | C23 | 5.3436  | 1.3617  | -1.6181 | C.3  | -0.0602 |
| 63 | S1  | 0.8212  | 2.1371  | -4.415  | S.3  | -0.0465 |
| 64 | C19 | -0.5956 | 2.3171  | -3.3035 | C.3  | 0.043   |
| 65 | C18 | -0.0811 | 3.2554  | -2.179  | C.3  | 0.1002  |
| 66 | N4  | 1.2812  | 2.8561  | -1.9024 | N.2  | -0.3321 |
| 67 | C17 | -0.9822 | 3.2598  | -0.962  | C.2  | 0.1909  |
| 68 | N3  | -0.7054 | 4.011   | 0.1422  | N.am | -0.2542 |
| 69 | O6  | -1.9876 | 2.5696  | -1.0251 | O.2  | -0.3959 |
| 70 | C11 | -1.6893 | 4.0105  | 1.236   | C.3  | 0.1336  |
| 71 | C10 | -1.0613 | 4.2406  | 2.593   | C.2  | 0.2042  |
| 72 | C16 | 0.5147  | 4.8271  | 0.1774  | C.3  | 0.0254  |
| 73 | C12 | -2.9431 | 4.8711  | 0.8942  | C.3  | -0.0099 |
| 74 | C13 | -2.6614 | 6.2664  | 0.2587  | C.3  | -0.0425 |
| 75 | C15 | -3.9795 | 6.8484  | -0.3245 | C.3  | -0.0625 |
| 76 | C14 | -2.055  | 7.2774  | 1.2704  | C.3  | -0.0625 |
| 77 | O5  | -1.4459 | 5.1552  | 3.3033  | O.2  | -0.3944 |
| 78 | H2  | 0.1986  | 2.6527  | 2.3208  | H    | 0.1884  |
| 79 | H7A | 0.4234  | 4.4195  | 4.7131  | H    | 0.0826  |
| 80 | H8A | 2.1436  | 1.9788  | 3.9235  | H    | 0.0639  |
| 81 | H4  | 2.6017  | 4.0169  | 5.8852  | H    | 0.2101  |
| 82 | H9A | 2.6548  | 4.9787  | 3.4208  | H    | 0.0257  |
| 83 | H9B | 2.4803  | 3.6984  | 2.1865  | H    | 0.0257  |
| 84 | H9C | 3.8899  | 3.6909  | 3.2717  | H    | 0.0257  |
| 85 | H1  | -0.0961 | 0.8794  | 3.8705  | H    | 0.1856  |
| 86 | H3A | -1.5168 | 0.6159  | 6.5027  | H    | 0.0582  |
| 87 | H2A | -3.3607 | -0.5063 | 5.156   | H    | 0.0574  |
| 88 | H4B | -1.3821 | -1.8024 | 6.1243  | H    | 0.0253  |
| 89 | H4A | -0.6918 | -1.5606 | 4.4985  | H    | 0.0253  |
| 90 | H4C | 0.256   | -1.1049 | 5.9447  | H    | 0.0253  |
| 91 | H5C | -4.4813 | 1.5999  | 4.5422  | H    | 0.0258  |
| 92 | H5A | -3.5785 | 1.8478  | 6.0525  | H    | 0.0258  |
| 93 | H5B | -2.9306 | 2.4827  | 4.5122  | H    | 0.0258  |



**Table S13. Continued**

|     |      |         |         |         |   |        |
|-----|------|---------|---------|---------|---|--------|
| 94  | H49A | -3.6802 | -1.9439 | 1.0004  | H | 0.0918 |
| 95  | H50B | -4.3954 | -0.0647 | -0.3528 | H | 0.048  |
| 96  | H50A | -3.6666 | 1.1107  | 0.7534  | H | 0.048  |
| 97  | H56A | -5.2032 | 2.2332  | 2.1641  | H | 0.0557 |
| 98  | H55A | -7.265  | 2.2793  | 3.5188  | H | 0.0599 |
| 99  | H54A | -8.7506 | 0.2898  | 3.6026  | H | 0.0559 |
| 100 | H53A | -8.1713 | -1.7415 | 2.2959  | H | 0.0599 |
| 101 | H52A | -6.1123 | -1.7934 | 0.9314  | H | 0.0557 |
| 102 | H43A | 0.1539  | -1.3101 | -1.007  | H | 0.0805 |
| 103 | H47C | -0.3934 | -3.7692 | 1.7067  | H | 0.0488 |
| 104 | H47B | -1.6668 | -2.8519 | 2.5063  | H | 0.0488 |
| 105 | H47A | -2.0253 | -3.7699 | 1.0105  | H | 0.0488 |
| 106 | H44A | 2.3748  | -1.3247 | 0.0416  | H | 0.0343 |
| 107 | H46A | 0.3217  | 0.4092  | 1.5072  | H | 0.0234 |
| 108 | H46C | 0.9699  | 0.7828  | -0.1086 | H | 0.0234 |
| 109 | H46B | 2.0479  | 0.7955  | 1.3133  | H | 0.0234 |
| 110 | H45A | 0.8969  | -1.7551 | 2.7108  | H | 0.0234 |
| 111 | H45B | 2.044   | -2.9175 | 1.9984  | H | 0.0234 |
| 112 | H45C | 2.6142  | -1.3265 | 2.5297  | H | 0.0234 |
| 113 | H41A | -1.8807 | -2.7582 | -1.5708 | H | 0.0524 |
| 114 | H41B | -0.8673 | -2.3825 | -3.0182 | H | 0.0524 |
| 115 | H40B | -2.9369 | -4.3627 | -2.9779 | H | 0.0287 |
| 116 | H40A | -1.5227 | -4.4186 | -4.0747 | H | 0.0287 |
| 117 | H39A | -1.4217 | -6.5495 | -2.7628 | H | 0.0313 |
| 118 | H39B | -1.6899 | -5.6463 | -1.2549 | H | 0.0313 |
| 119 | H38A | 0.7383  | -5.8335 | -1.3651 | H | 0.0802 |
| 120 | H36C | 3.4238  | -4.5809 | -5.6343 | H | 0.0489 |
| 121 | H36B | 2.7837  | -6.1984 | -5.2937 | H | 0.0489 |
| 122 | H36A | 1.7412  | -4.9598 | -6.0626 | H | 0.0489 |
| 123 | H28A | 2.1212  | -3.1399 | -2.5081 | H | 0.088  |
| 124 | H29A | 4.7031  | -4.4775 | -3.5023 | H | 0.0485 |
| 125 | H29B | 4.6398  | -3.0699 | -2.4216 | H | 0.0485 |
| 126 | H35A | 4.5269  | -3.4266 | -0.0562 | H | 0.0557 |
| 127 | H34A | 4.1983  | -4.9224 | 1.8783  | H | 0.0599 |
| 128 | H33A | 3.4297  | -7.2593 | 1.5353  | H | 0.0559 |
| 129 | H32A | 3.0441  | -8.1094 | -0.7668 | H | 0.0599 |
| 130 | H31A | 3.4107  | -6.6283 | -2.7128 | H | 0.0557 |
| 131 | H25A | 4.6097  | -0.9483 | -6.2626 | H | 0.0619 |
| 132 | H26B | 2.0164  | -0.1358 | -6.6765 | H | 0.0448 |
| 133 | H26A | 2.5382  | -1.8055 | -7.0844 | H | 0.0448 |
| 134 | H5   | 2.8317  | -0.1463 | -3.1651 | H | 0.1896 |
| 135 | H21A | 3.7802  | 2.7005  | -3.5026 | H | 0.0854 |
| 136 | H22B | 3.7836  | 2.7603  | -1.0142 | H | 0.032  |
| 137 | H22A | 3.3015  | 1.0412  | -0.9598 | H | 0.032  |
| 138 | H23B | 5.927   | 2.1002  | -2.1897 | H | 0.0233 |
| 139 | H23A | 5.4364  | 0.3807  | -2.1098 | H | 0.0233 |
| 140 | H23C | 5.7691  | 1.2863  | -0.6049 | H | 0.0233 |

**Table S13. Continued**

|     |       |         |         |         |    |        |
|-----|-------|---------|---------|---------|----|--------|
| 141 | H19B  | -1.4783 | 2.7163  | -3.827  | H  | 0.0448 |
| 142 | H19A  | -0.822  | 1.315   | -2.9049 | H  | 0.0448 |
| 143 | H18A  | -0.0478 | 4.2851  | -2.5685 | H  | 0.0619 |
| 144 | H11A  | -2.0747 | 2.9893  | 1.369   | H  | 0.0802 |
| 145 | H16A  | 0.6363  | 5.3702  | 1.1234  | H  | 0.0488 |
| 146 | H16B  | 0.5087  | 5.5787  | -0.6251 | H  | 0.0488 |
| 147 | H16C  | 1.4054  | 4.1958  | 0.068   | H  | 0.0488 |
| 148 | H12B  | -3.5281 | 4.2993  | 0.1542  | H  | 0.0315 |
| 149 | H12A  | -3.5778 | 4.9811  | 1.7882  | H  | 0.0315 |
| 150 | H13A  | -1.9692 | 6.1501  | -0.5911 | H  | 0.0298 |
| 151 | H15A  | -4.7269 | 6.9679  | 0.4742  | H  | 0.0232 |
| 152 | H15B  | -3.7967 | 7.8289  | -0.7903 | H  | 0.0232 |
| 153 | H15C  | -4.3919 | 6.1791  | -1.0964 | H  | 0.0232 |
| 154 | H14A  | -1.9325 | 8.2645  | 0.7984  | H  | 0.0232 |
| 155 | H14C  | -2.7159 | 7.389   | 2.1435  | H  | 0.0232 |
| 156 | H14B  | -1.0654 | 6.9543  | 1.6154  | H  | 0.0232 |
| 157 | P5    | -3.6635 | 1.9768  | 5.0356  | Du | 0      |
| 158 | P4    | -0.606  | -1.4893 | 5.5225  | Du | 0      |
| 159 | P9    | 3.0083  | 4.1227  | 2.9596  | Du | 0      |
| 160 | P12   | -3.553  | 4.6402  | 0.9712  | Du | 0      |
| 161 | P15   | -4.3052 | 6.992   | -0.4708 | Du | 0      |
| 162 | P14   | -1.9046 | 7.536   | 1.5191  | Du | 0      |
| 163 | P16   | 0.8502  | 5.0482  | 0.1888  | Du | 0      |
| 164 | P22   | 3.5425  | 1.9008  | -0.987  | Du | 0      |
| 165 | P23   | 5.7109  | 1.2557  | -1.6348 | Du | 0      |
| 166 | P29   | 4.6714  | -3.7737 | -2.962  | Du | 0      |
| 167 | P3135 | 3.9688  | -5.0275 | -1.3845 | Du | 0      |
| 168 | P39   | -1.5558 | -6.0979 | -2.0088 | Du | 0      |
| 169 | P40   | -2.2298 | -4.3907 | -3.5263 | Du | 0      |
| 170 | P41   | -1.374  | -2.5704 | -2.2945 | Du | 0      |
| 171 | P46   | 1.1132  | 0.6625  | 0.904   | Du | 0      |
| 172 | P45   | 1.8517  | -1.9997 | 2.413   | Du | 0      |
| 173 | P50   | -4.031  | 0.523   | 0.2003  | Du | 0      |
| 174 | P36   | 2.6495  | -5.2464 | -5.6635 | Du | 0      |
| 175 | P47   | -1.3618 | -3.4637 | 1.7412  | Du | 0      |
| 176 | P19   | -1.1501 | 2.0156  | -3.366  | Du | 0      |

<sup>a</sup>Atom nomenclature as in Figure 1a. <sup>b</sup>Pseudoatoms used in modeling are designated by “P” followed by the number of the relevant carbon atom(s). <sup>c</sup>Tripos forcefield atom type. <sup>d</sup>Gasteiger-Huckel charges.

**Table S14.** Atom coordinates for modeled grassypeptolide C (**3**) structure 10

| Atom number | Atom name <sup>a,b</sup> | x       | y       | z       | Atom type <sup>c</sup> | Charge <sup>d</sup> |
|-------------|--------------------------|---------|---------|---------|------------------------|---------------------|
| 1           | N7                       | -4.5134 | 4.3308  | -0.0025 | N.am                   | -0.2484             |
| 2           | C28                      | -3.5328 | 4.0194  | -1.0513 | C.3                    | 0.128               |
| 3           | C27                      | -2.4282 | 5.0439  | -1.0768 | C.2                    | 0.1037              |
| 4           | C29                      | -4.115  | 3.9654  | -2.503  | C.3                    | 0.0238              |
| 5           | C30                      | -5.5067 | 3.3144  | -2.5985 | C.ar                   | -0.0376             |
| 6           | C31                      | -5.6791 | 1.9673  | -2.2678 | C.ar                   | -0.06               |
| 7           | C32                      | -6.9496 | 1.3857  | -2.2537 | C.ar                   | -0.0686             |
| 8           | C33                      | -8.0641 | 2.1403  | -2.6277 | C.ar                   | -0.0687             |
| 9           | C34                      | -7.8961 | 3.4684  | -3.0275 | C.ar                   | -0.0686             |
| 10          | C35                      | -6.6233 | 4.0467  | -3.023  | C.ar                   | -0.06               |
| 11          | N6                       | -1.4398 | 4.8062  | -1.838  | N.2                    | -0.332              |
| 12          | C25                      | -0.4947 | 5.8953  | -1.7599 | C.3                    | 0.1001              |
| 13          | C26                      | -0.6909 | 6.5903  | -0.39   | C.3                    | 0.043               |
| 14          | S2                       | -2.4866 | 6.5415  | -0.1277 | S.3                    | -0.0463             |
| 15          | C36                      | -5.6504 | 5.2192  | -0.2632 | C.3                    | 0.0266              |
| 16          | C24                      | 0.8901  | 5.3248  | -1.919  | C.2                    | 0.1895              |
| 17          | N5                       | 1.0296  | 4.0041  | -1.6603 | N.am                   | -0.2623             |
| 18          | O7                       | 1.7989  | 6.0563  | -2.2781 | O.2                    | -0.396              |
| 19          | C21                      | 2.3031  | 3.3149  | -1.8445 | C.3                    | 0.1158              |
| 20          | C20                      | 2.724   | 2.7277  | -0.5234 | C.2                    | 0.1014              |
| 21          | C22                      | 2.1228  | 2.2201  | -2.9303 | C.3                    | -0.013              |
| 22          | C23                      | 1.6116  | 2.8229  | -4.2641 | C.3                    | -0.0602             |
| 23          | N4                       | 3.3054  | 1.5981  | -0.5082 | N.2                    | -0.3321             |
| 24          | C18                      | 3.6744  | 1.2593  | 0.8462  | C.3                    | 0.1002              |
| 25          | C19                      | 2.6915  | 2.009   | 1.7856  | C.3                    | 0.043               |
| 26          | S1                       | 2.4266  | 3.6115  | 0.9841  | S.3                    | -0.0465             |
| 27          | C17                      | 3.6903  | -0.2387 | 1.0579  | C.2                    | 0.1909              |
| 28          | N3                       | 4.5879  | -1.0461 | 0.4238  | N.am                   | -0.2542             |
| 29          | O6                       | 2.878   | -0.6849 | 1.8501  | O.2                    | -0.3959             |
| 30          | C16                      | 5.5492  | -0.4724 | -0.5229 | C.3                    | 0.0254              |
| 31          | C11                      | 4.5874  | -2.4843 | 0.7192  | C.3                    | 0.1336              |
| 32          | C10                      | 4.257   | -3.1635 | -0.5821 | C.2                    | 0.2042              |
| 33          | C12                      | 5.9227  | -2.9943 | 1.3341  | C.3                    | -0.0099             |
| 34          | C13                      | 6.2129  | -2.5046 | 2.7856  | C.3                    | -0.0425             |
| 35          | C15                      | 6.5822  | -0.9988 | 2.8765  | C.3                    | -0.0625             |
| 36          | C14                      | 5.0522  | -2.8465 | 3.7594  | C.3                    | -0.0625             |
| 37          | N2                       | 2.9919  | -2.9992 | -1.0344 | N.am                   | -0.2613             |
| 38          | O5                       | 5.1181  | -3.8019 | -1.1669 | O.2                    | -0.3944             |
| 39          | C7                       | 2.5481  | -3.6426 | -2.2653 | C.3                    | 0.1563              |
| 40          | C6                       | 1.7822  | -4.9018 | -1.9191 | C.2                    | 0.2046              |
| 41          | C8                       | 1.7579  | -2.6381 | -3.1408 | C.3                    | 0.0924              |
| 42          | O4                       | 1.2791  | -3.3275 | -4.3087 | O.3                    | -0.3874             |
| 43          | C9                       | 2.6604  | -1.4371 | -3.5315 | C.3                    | -0.0346             |
| 44          | N1                       | 0.7667  | -4.8479 | -1.0229 | N.am                   | -0.2796             |
| 45          | O3                       | 2.1359  | -5.9452 | -2.4472 | O.2                    | -0.3944             |
| 46          | C3                       | 0.1346  | -6.0719 | -0.5235 | C.3                    | 0.0598              |

**Table S14. Continued**

|    |      |         |         |         |      |         |
|----|------|---------|---------|---------|------|---------|
| 47 | C2   | 0.5471  | -6.275  | 0.9659  | C.3  | 0.08    |
| 48 | C1   | -0.0846 | -5.2466 | 1.8712  | C.2  | 0.2415  |
| 49 | C4   | -1.405  | -6.0051 | -0.7059 | C.3  | -0.0395 |
| 50 | C5   | 2.0887  | -6.2003 | 1.132   | C.3  | -0.0418 |
| 51 | O1   | -0.1171 | -4.0037 | 1.3673  | O.3  | -0.2498 |
| 52 | O2   | -0.538  | -5.5607 | 2.9611  | O.2  | -0.3699 |
| 53 | C49  | -0.6862 | -2.9929 | 2.2253  | C.3  | 0.1852  |
| 54 | C48  | -0.9152 | -1.8228 | 1.2857  | C.2  | 0.2166  |
| 55 | C50  | 0.3163  | -2.6394 | 3.3594  | C.3  | 0.0292  |
| 56 | N9   | -2.1463 | -1.3017 | 0.9807  | N.am | -0.252  |
| 57 | O10  | 0.1089  | -1.3918 | 0.778   | O.2  | -0.3933 |
| 58 | C51  | -0.1904 | -1.4939 | 4.2505  | C.ar | -0.0379 |
| 59 | C52  | 0.5429  | -0.3089 | 4.386   | C.ar | -0.0601 |
| 60 | C53  | 0.0825  | 0.7239  | 5.2068  | C.ar | -0.0686 |
| 61 | C54  | -1.1339 | 0.5917  | 5.8813  | C.ar | -0.0687 |
| 62 | C55  | -1.8738 | -0.5861 | 5.7501  | C.ar | -0.0686 |
| 63 | C56  | -1.3921 | -1.6306 | 4.9559  | C.ar | -0.0601 |
| 64 | C43  | -2.2462 | -0.2411 | -0.0399 | C.3  | 0.1359  |
| 65 | C47  | -3.3533 | -1.8465 | 1.6119  | C.3  | 0.0255  |
| 66 | C42  | -3.0922 | 0.9011  | 0.5128  | C.2  | 0.2068  |
| 67 | C44  | -2.7778 | -0.8202 | -1.3929 | C.3  | -0.0061 |
| 68 | C45  | -2.3051 | 0.0555  | -2.5921 | C.3  | -0.0584 |
| 69 | C46  | -2.3043 | -2.2816 | -1.6294 | C.3  | -0.0584 |
| 70 | C37  | -4.4544 | 3.7756  | 1.2473  | C.2  | 0.2073  |
| 71 | C38  | -3.3742 | 2.9137  | 1.8931  | C.3  | 0.134   |
| 72 | C39  | -2.2693 | 3.8538  | 2.4332  | C.3  | -0.0104 |
| 73 | C40  | -1.1006 | 2.9029  | 2.7524  | C.3  | -0.0281 |
| 74 | C41  | -1.1169 | 1.9324  | 1.5514  | C.3  | 0.0369  |
| 75 | N8   | -2.5421 | 1.8983  | 1.2508  | N.am | -0.2498 |
| 76 | O9   | -4.291  | 0.9135  | 0.2864  | O.2  | -0.3942 |
| 77 | O8   | -5.3398 | 4.0547  | 2.0426  | O.2  | -0.3941 |
| 78 | H28A | -3.0759 | 3.0439  | -0.8589 | H    | 0.088   |
| 79 | H29A | -4.1666 | 4.9831  | -2.9212 | H    | 0.0485  |
| 80 | H29B | -3.4341 | 3.4014  | -3.1611 | H    | 0.0485  |
| 81 | H31A | -4.8203 | 1.3625  | -2.0251 | H    | 0.0557  |
| 82 | H32A | -7.0696 | 0.3489  | -1.9547 | H    | 0.0599  |
| 83 | H33A | -9.0546 | 1.6965  | -2.61   | H    | 0.0559  |
| 84 | H34A | -8.7561 | 4.0521  | -3.3413 | H    | 0.0599  |
| 85 | H35A | -6.5141 | 5.0746  | -3.3515 | H    | 0.0557  |
| 86 | H25A | -0.7142 | 6.5894  | -2.5883 | H    | 0.0619  |
| 87 | H26A | -0.2092 | 6.0044  | 0.4087  | H    | 0.0448  |
| 88 | H26B | -0.3006 | 7.6195  | -0.3762 | H    | 0.0448  |
| 89 | H36B | -5.7797 | 5.9363  | 0.5625  | H    | 0.0489  |
| 90 | H36C | -6.5745 | 4.6307  | -0.3629 | H    | 0.0489  |
| 91 | H36A | -5.503  | 5.8289  | -1.1632 | H    | 0.0489  |
| 92 | H5   | 0.2407  | 3.4599  | -1.3685 | H    | 0.1896  |
| 93 | H21A | 3.112   | 3.9932  | -2.1604 | H    | 0.0854  |

**Table S14. Continued**

|     |      |         |         |         |   |        |
|-----|------|---------|---------|---------|---|--------|
| 94  | H22A | 3.0884  | 1.7192  | -3.11   | H | 0.032  |
| 95  | H22B | 1.3992  | 1.4691  | -2.5721 | H | 0.032  |
| 96  | H23B | 1.526   | 2.0322  | -5.0261 | H | 0.0233 |
| 97  | H23C | 2.3122  | 3.5894  | -4.6299 | H | 0.0233 |
| 98  | H23A | 0.6208  | 3.2843  | -4.1302 | H | 0.0233 |
| 99  | H18A | 4.6863  | 1.6502  | 1.0335  | H | 0.0619 |
| 100 | H19A | 3.0725  | 2.1178  | 2.8129  | H | 0.0448 |
| 101 | H19B | 1.7155  | 1.5052  | 1.8093  | H | 0.0448 |
| 102 | H16B | 6.2788  | 0.1622  | -0.001  | H | 0.0488 |
| 103 | H16C | 6.1082  | -1.2557 | -1.0545 | H | 0.0488 |
| 104 | H16A | 5.0418  | 0.1164  | -1.2985 | H | 0.0488 |
| 105 | H11A | 3.7775  | -2.8065 | 1.3903  | H | 0.0802 |
| 106 | H12A | 5.8693  | -4.0964 | 1.3619  | H | 0.0315 |
| 107 | H12B | 6.7743  | -2.7299 | 0.6893  | H | 0.0315 |
| 108 | H13A | 7.1059  | -3.0596 | 3.123   | H | 0.0298 |
| 109 | H15B | 6.9225  | -0.7582 | 3.8959  | H | 0.0232 |
| 110 | H15C | 7.3959  | -0.7578 | 2.1757  | H | 0.0232 |
| 111 | H15A | 5.7209  | -0.3576 | 2.654   | H | 0.0232 |
| 112 | H14B | 5.3834  | -2.7131 | 4.7992  | H | 0.0232 |
| 113 | H14C | 4.1869  | -2.1878 | 3.5955  | H | 0.0232 |
| 114 | H14A | 4.7333  | -3.892  | 3.6231  | H | 0.0232 |
| 115 | H2   | 2.3241  | -2.4637 | -0.5118 | H | 0.1884 |
| 116 | H7A  | 3.4207  | -3.977  | -2.8419 | H | 0.0826 |
| 117 | H8A  | 0.9087  | -2.2543 | -2.5568 | H | 0.0639 |
| 118 | H4   | 0.7569  | -2.7693 | -4.8758 | H | 0.2101 |
| 119 | H9C  | 3.5263  | -1.7847 | -4.1152 | H | 0.0257 |
| 120 | H9B  | 2.0929  | -0.7165 | -4.1396 | H | 0.0257 |
| 121 | H9A  | 3.0264  | -0.9205 | -2.6308 | H | 0.0257 |
| 122 | H1   | 0.4892  | -3.9858 | -0.5996 | H | 0.1856 |
| 123 | H3A  | 0.4782  | -6.9626 | -1.0778 | H | 0.0582 |
| 124 | H2A  | 0.2031  | -7.2738 | 1.2869  | H | 0.0574 |
| 125 | H4C  | -1.8402 | -5.1624 | -0.1511 | H | 0.0253 |
| 126 | H4B  | -1.8744 | -6.9354 | -0.3497 | H | 0.0253 |
| 127 | H4A  | -1.6429 | -5.8749 | -1.7731 | H | 0.0253 |
| 128 | H5A  | 2.465   | -5.1949 | 0.8888  | H | 0.0258 |
| 129 | H5B  | 2.5817  | -6.9306 | 0.4719  | H | 0.0258 |
| 130 | H5C  | 2.3661  | -6.4273 | 2.1733  | H | 0.0258 |
| 131 | H49A | -1.6154 | -3.3653 | 2.6729  | H | 0.0918 |
| 132 | H50A | 1.2877  | -2.392  | 2.9066  | H | 0.048  |
| 133 | H50B | 0.4802  | -3.506  | 4.0173  | H | 0.048  |
| 134 | H52A | 1.4809  | -0.1792 | 3.8613  | H | 0.0557 |
| 135 | H53A | 0.6692  | 1.6308  | 5.3182  | H | 0.0599 |
| 136 | H54A | -1.5022 | 1.4006  | 6.5045  | H | 0.0559 |
| 137 | H55A | -2.8223 | -0.6907 | 6.2679  | H | 0.0599 |
| 138 | H56A | -1.9598 | -2.5529 | 4.8989  | H | 0.0557 |
| 139 | H43A | -1.2578 | 0.1639  | -0.2986 | H | 0.0805 |
| 140 | H47B | -4.2668 | -1.3784 | 1.2219  | H | 0.0488 |

**Table S14.** Continued

|     |       |         |         |         |    |        |
|-----|-------|---------|---------|---------|----|--------|
| 141 | H47A  | -3.4616 | -2.9246 | 1.4226  | H  | 0.0488 |
| 142 | H47C  | -3.3264 | -1.6593 | 2.696   | H  | 0.0488 |
| 143 | H44A  | -3.8799 | -0.8526 | -1.3806 | H  | 0.0343 |
| 144 | H45A  | -2.8358 | -0.2304 | -3.5137 | H  | 0.0234 |
| 145 | H45C  | -1.2243 | -0.0727 | -2.7625 | H  | 0.0234 |
| 146 | H45B  | -2.4876 | 1.1214  | -2.4007 | H  | 0.0234 |
| 147 | H46A  | -1.2156 | -2.349  | -1.5147 | H  | 0.0234 |
| 148 | H46B  | -2.772  | -2.9716 | -0.9149 | H  | 0.0234 |
| 149 | H46C  | -2.5705 | -2.621  | -2.6426 | H  | 0.0234 |
| 150 | H38A  | -3.8293 | 2.3834  | 2.7466  | H  | 0.0802 |
| 151 | H39A  | -1.9367 | 4.5333  | 1.6385  | H  | 0.0313 |
| 152 | H39B  | -2.593  | 4.4494  | 3.3026  | H  | 0.0313 |
| 153 | H40B  | -1.3561 | 2.3615  | 3.6762  | H  | 0.0287 |
| 154 | H40A  | -0.134  | 3.415   | 2.888   | H  | 0.0287 |
| 155 | H41A  | -0.7015 | 0.9618  | 1.861   | H  | 0.0524 |
| 156 | H41B  | -0.5608 | 2.3484  | 0.6979  | H  | 0.0524 |
| 157 | P5    | 2.4709  | -6.1842 | 1.178   | Du | 0      |
| 158 | P4    | -1.7858 | -5.9909 | -0.758  | Du | 0      |
| 159 | P9    | 2.8818  | -1.1406 | -3.6285 | Du | 0      |
| 160 | P12   | 6.3218  | -3.4131 | 1.0256  | Du | 0      |
| 161 | P15   | 6.6798  | -0.6245 | 2.9085  | Du | 0      |
| 162 | P14   | 4.7679  | -2.931  | 4.0059  | Du | 0      |
| 163 | P16   | 5.8096  | -0.3257 | -0.7847 | Du | 0      |
| 164 | P22   | 2.2438  | 1.5941  | -2.841  | Du | 0      |
| 165 | P23   | 1.4863  | 2.9686  | -4.5954 | Du | 0      |
| 166 | P29   | -3.8003 | 4.1923  | -3.0411 | Du | 0      |
| 167 | P3135 | -5.6672 | 3.2186  | -2.6883 | Du | 0      |
| 168 | P36   | -5.9524 | 5.4653  | -0.3212 | Du | 0      |
| 169 | P39   | -2.2648 | 4.4913  | 2.4705  | Du | 0      |
| 170 | P40   | -0.7451 | 2.8883  | 3.2821  | Du | 0      |
| 171 | P41   | -0.6312 | 1.6551  | 1.2794  | Du | 0      |
| 172 | P45   | -2.1826 | 0.2728  | -2.8923 | Du | 0      |
| 173 | P46   | -2.186  | -2.6472 | -1.6907 | Du | 0      |
| 174 | P47   | -3.6849 | -1.9874 | 1.7801  | Du | 0      |
| 175 | P50   | 0.8839  | -2.949  | 3.4619  | Du | 0      |
| 176 | P19   | 2.394   | 1.8115  | 2.3111  | Du | 0      |

<sup>a</sup>Atom nomenclature as in Figure 1a. <sup>b</sup>Pseudoatoms used in modeling are designated by “P” followed by the number of the relevant carbon atom(s). <sup>c</sup>Tripos forcefield atom type. <sup>d</sup>Gasteiger-Huckel charges.

<sup>1</sup>H NMR spectrum of grassypeptolide B (**2**) in CDCl<sub>3</sub> (600 MHz)

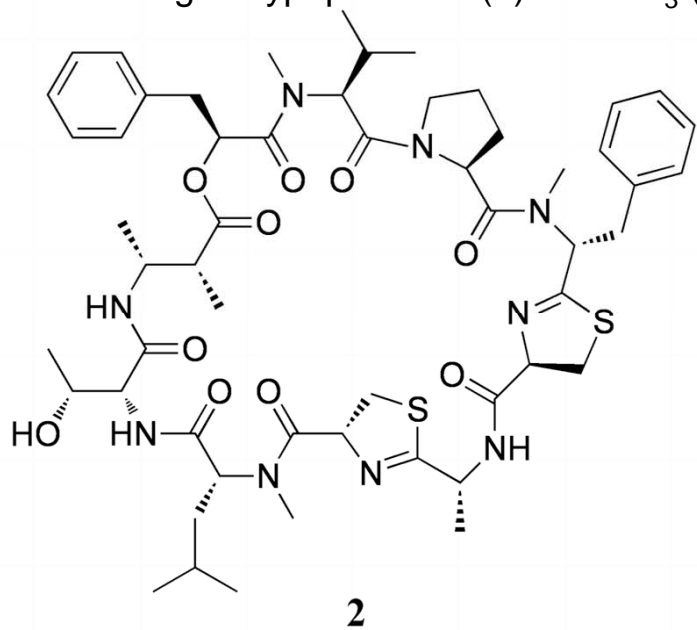

**2**

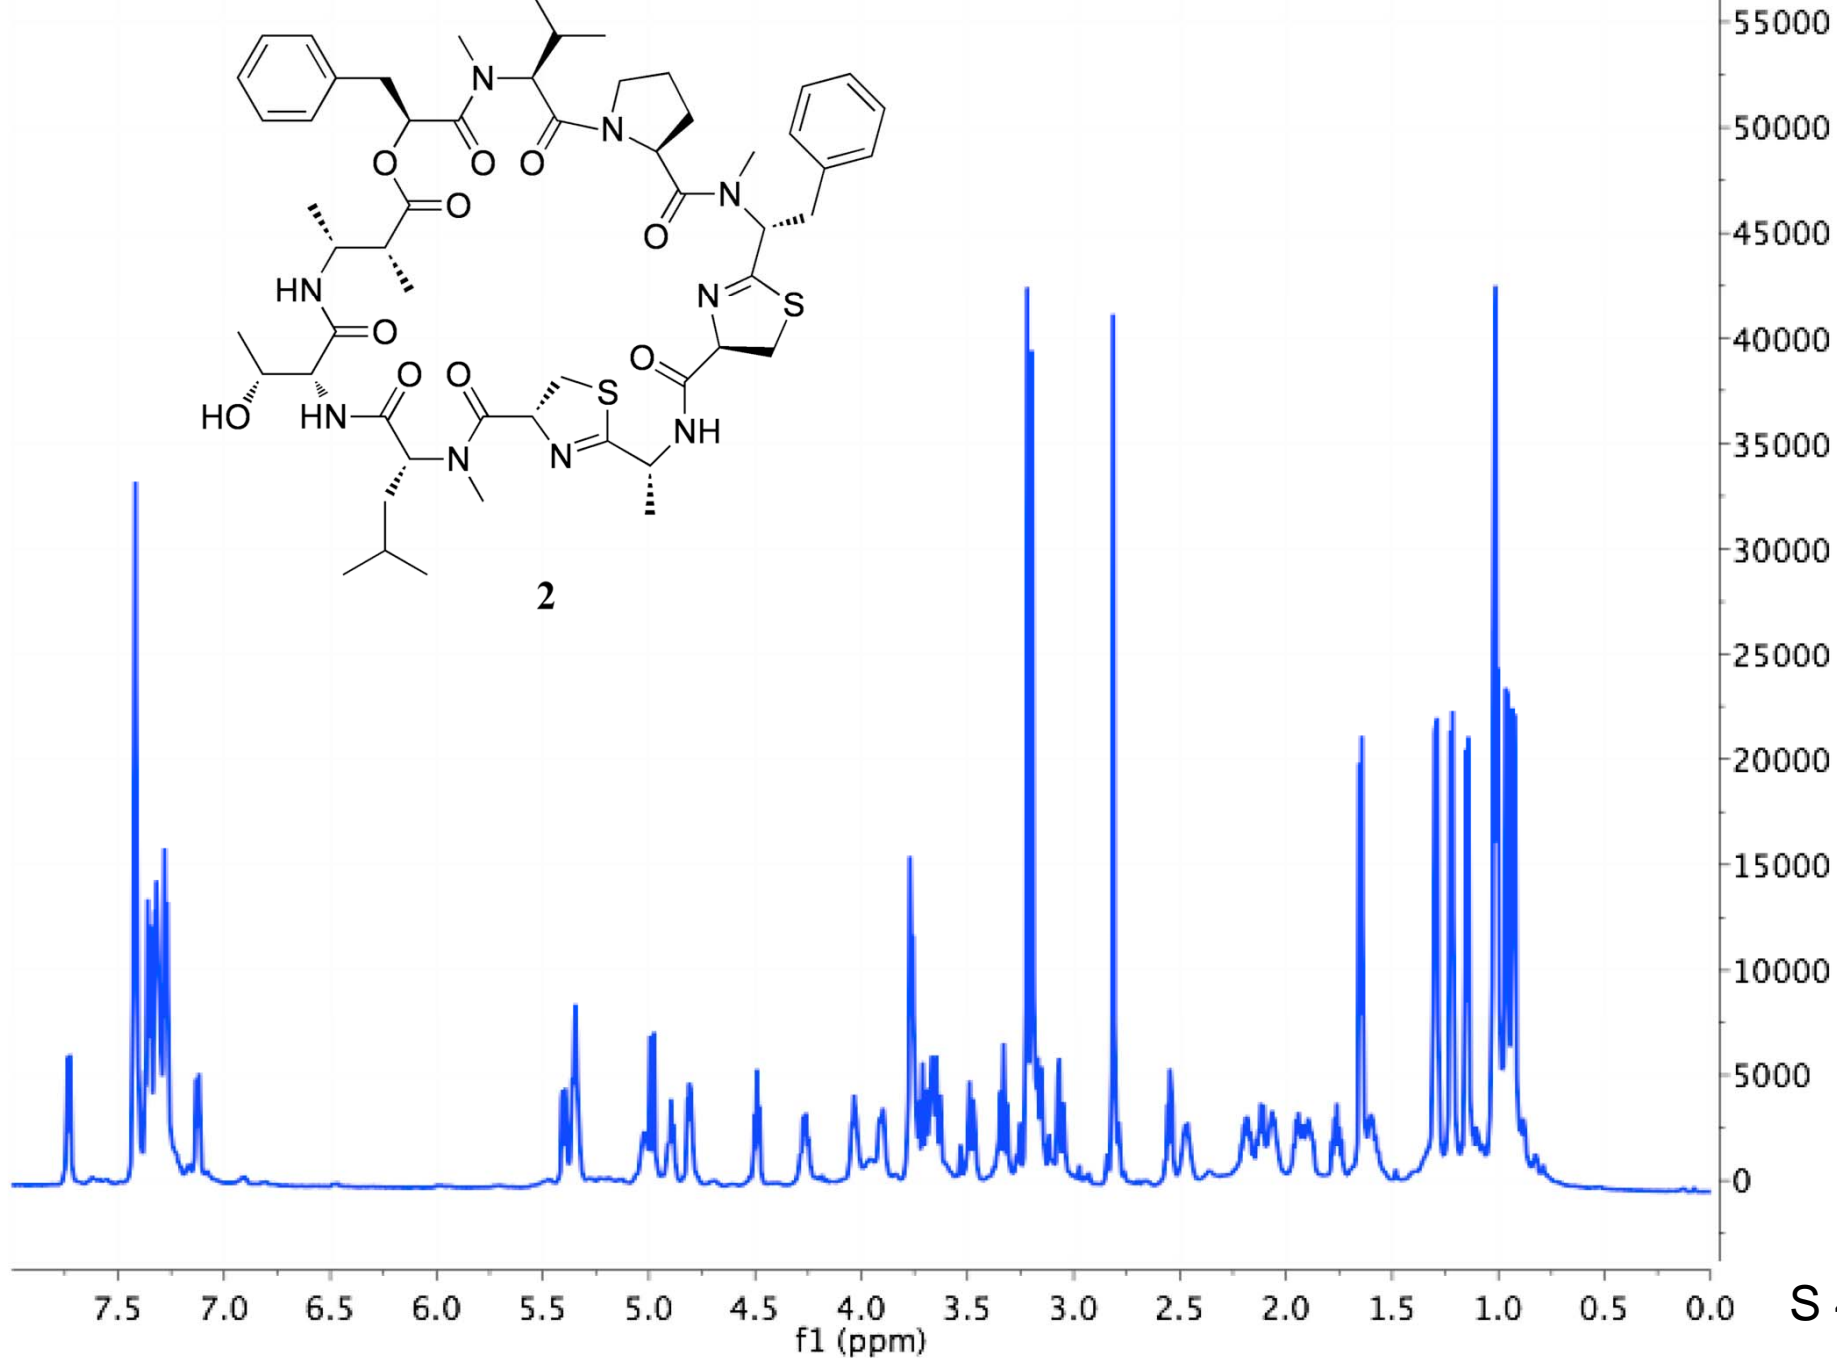

COSY spectrum of grassypeptolide B (**2**) in CDCl<sub>3</sub> (600 MHz)

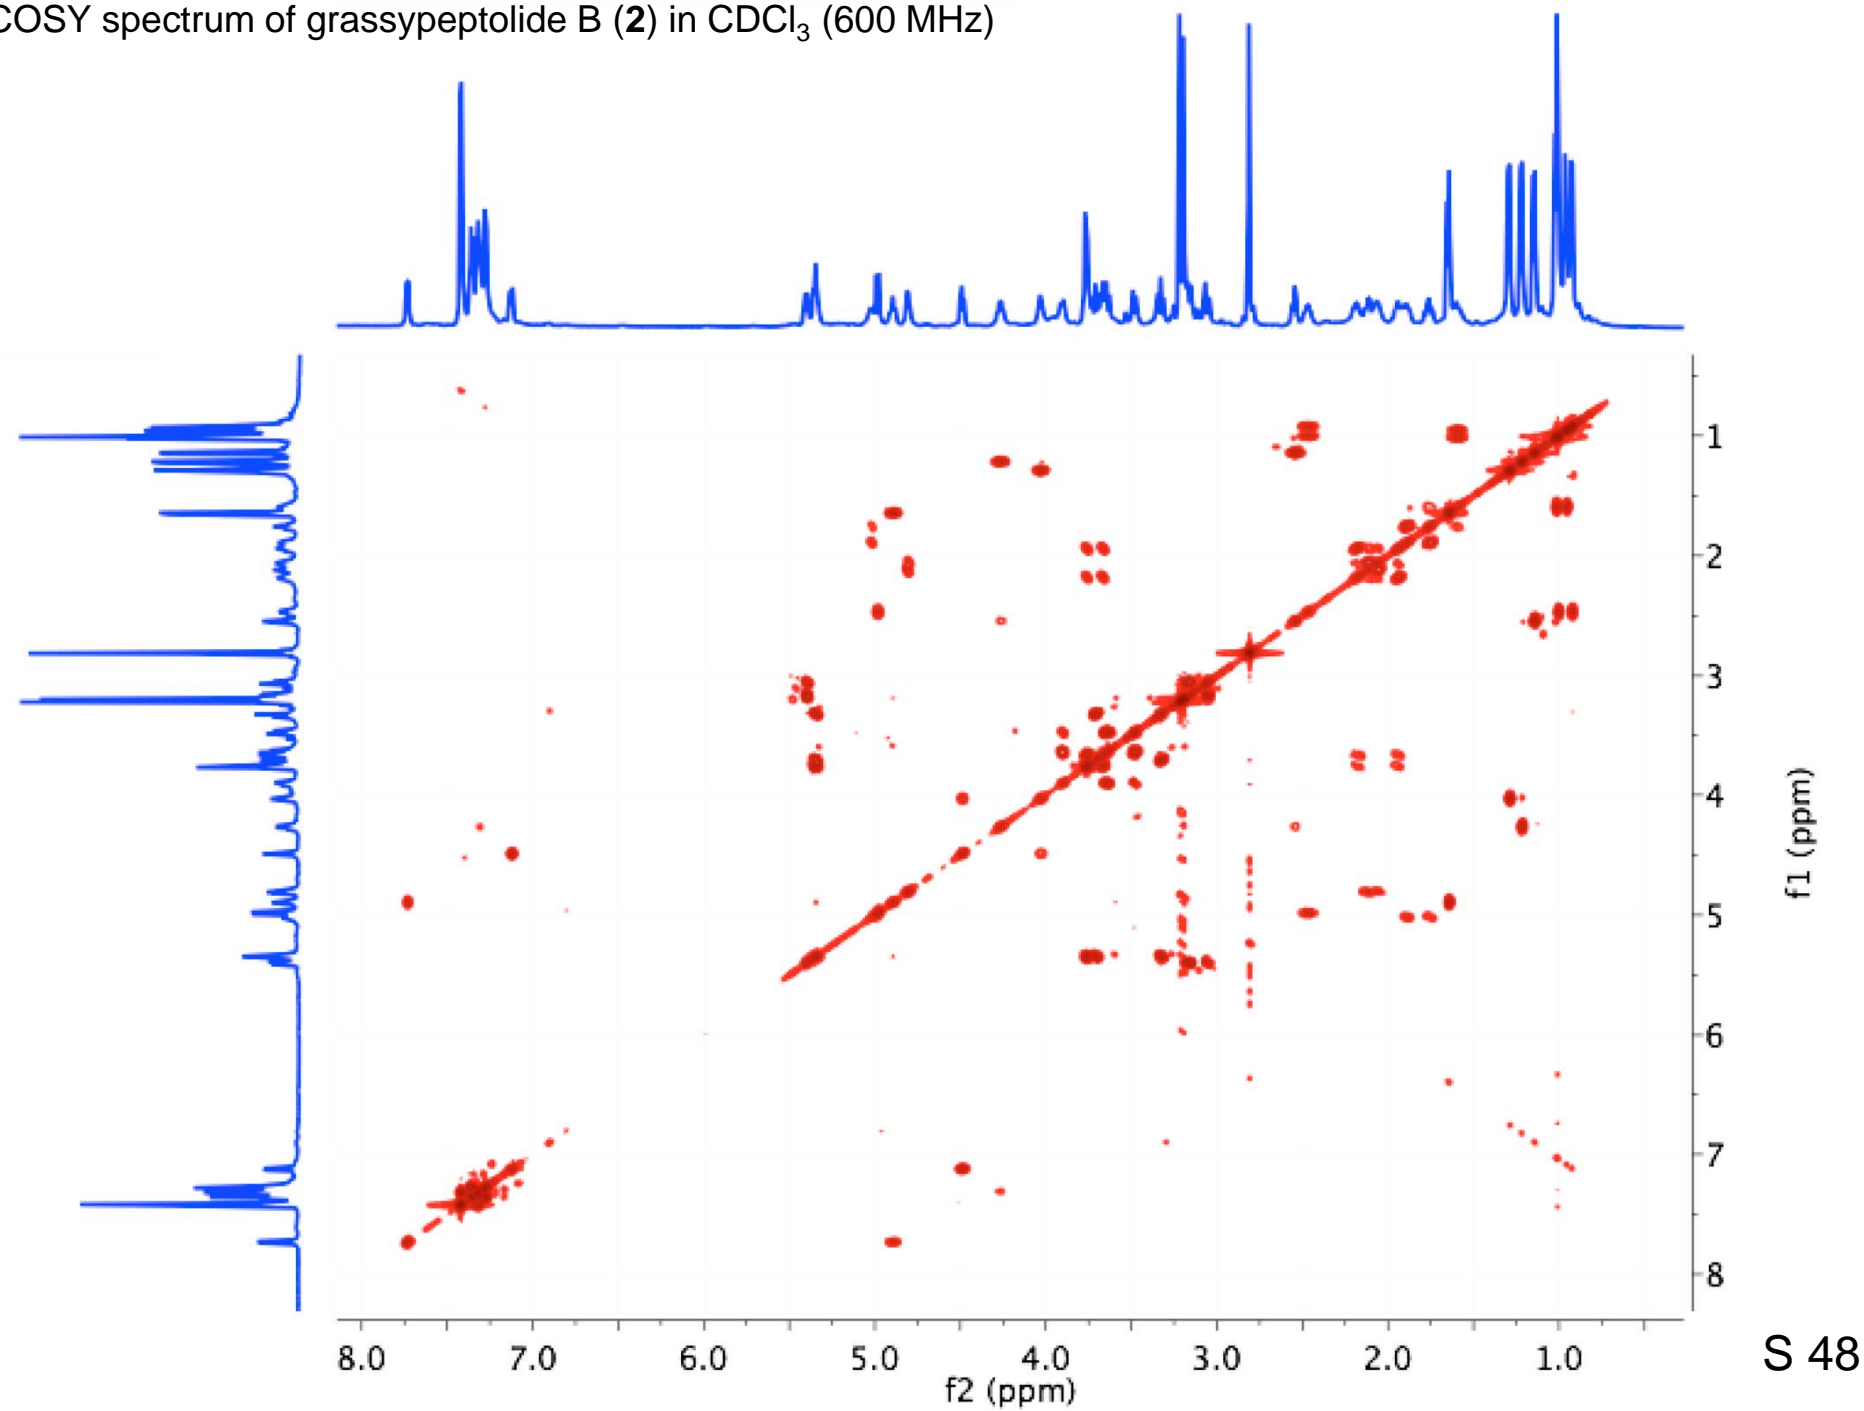



Edited HSQC spectrum of grassypeptolide B (**2**) in CDCl<sub>3</sub> (600 MHz)

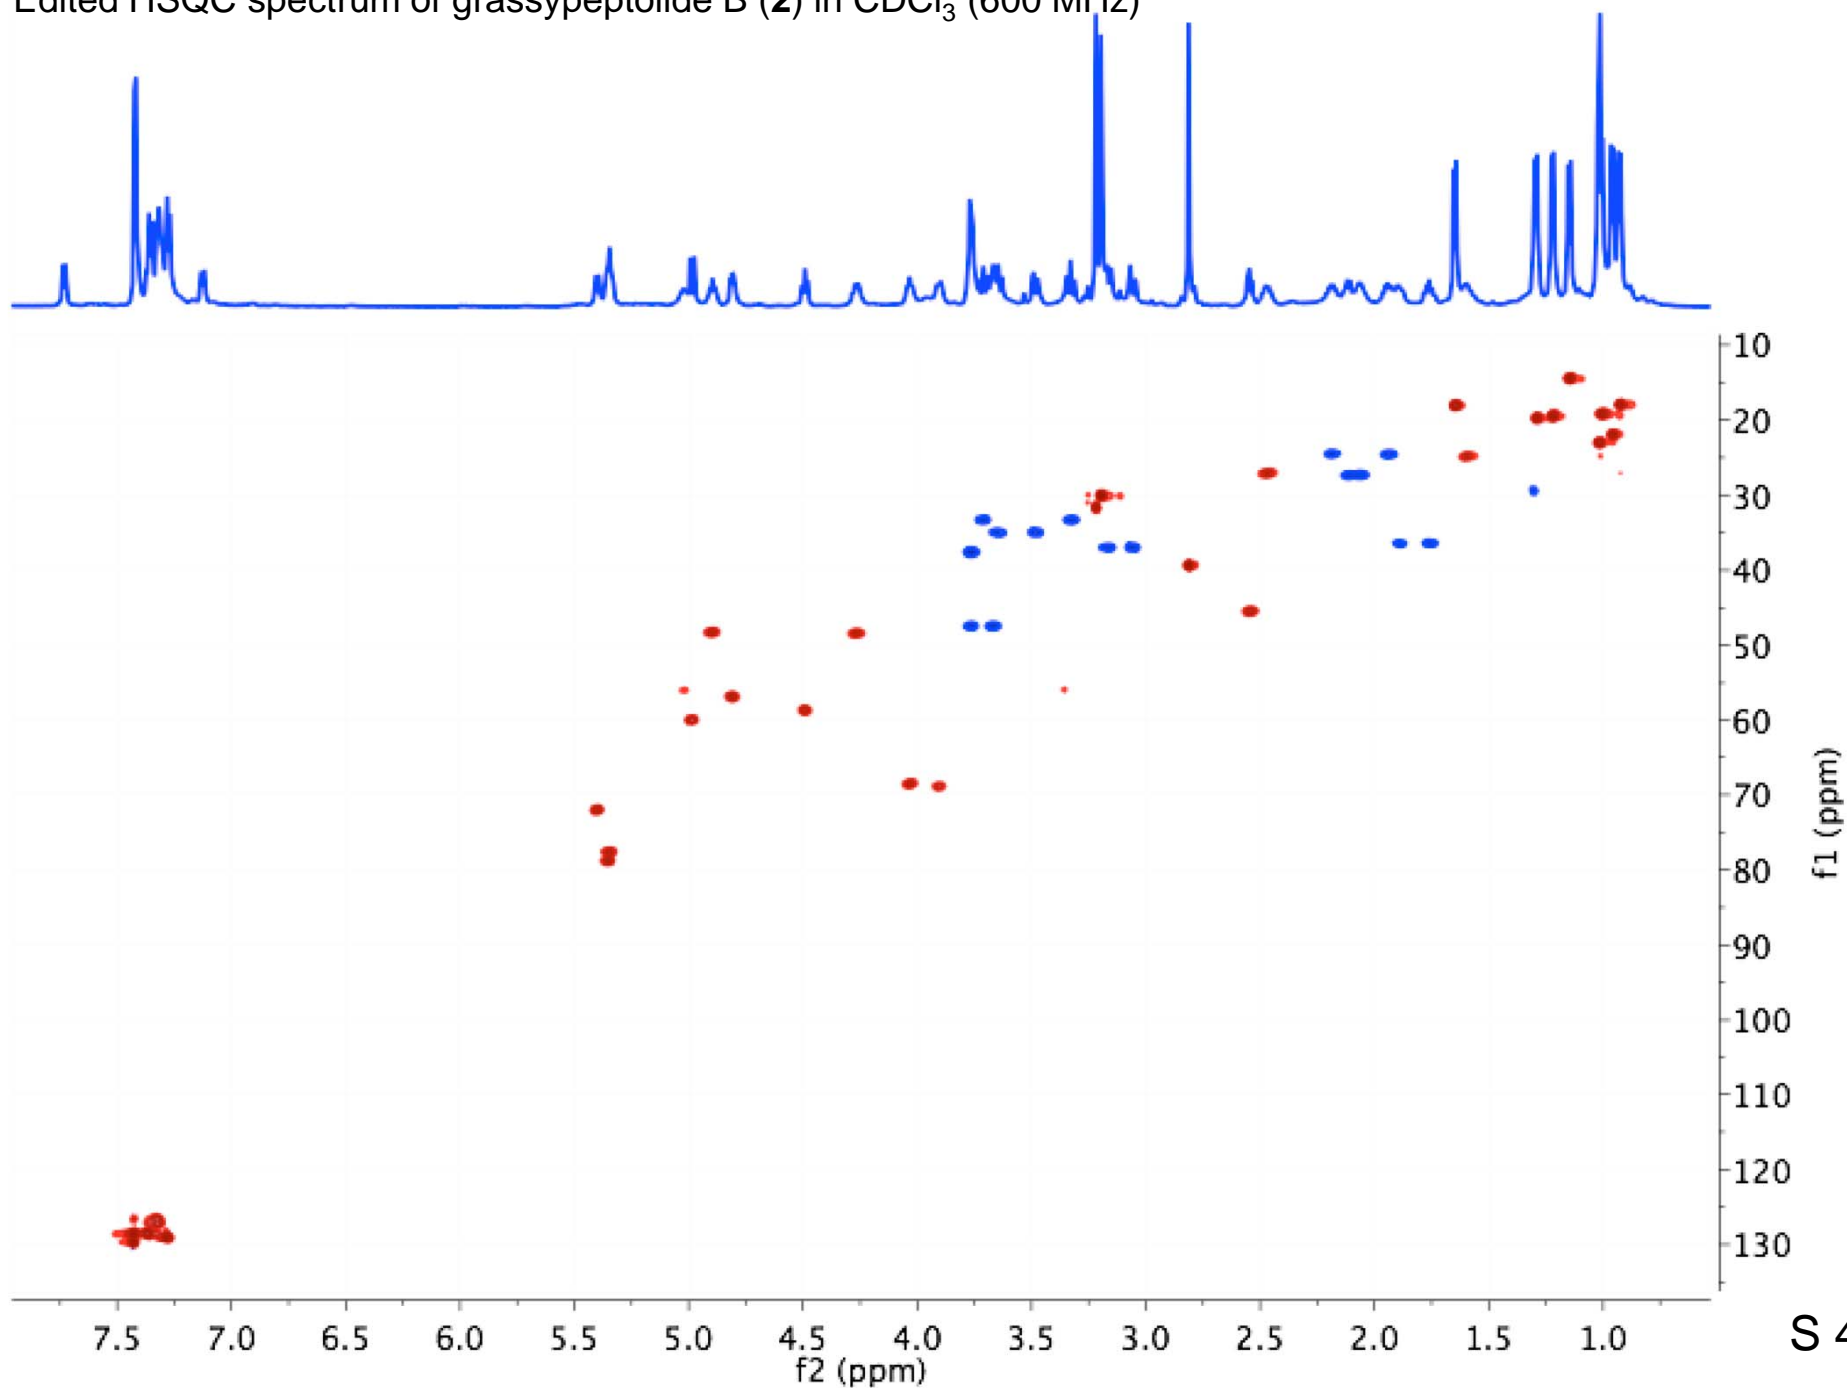

HMBC spectrum of grassypeptolide B (**2**) in  $\text{CDCl}_3$  (600 MHz)

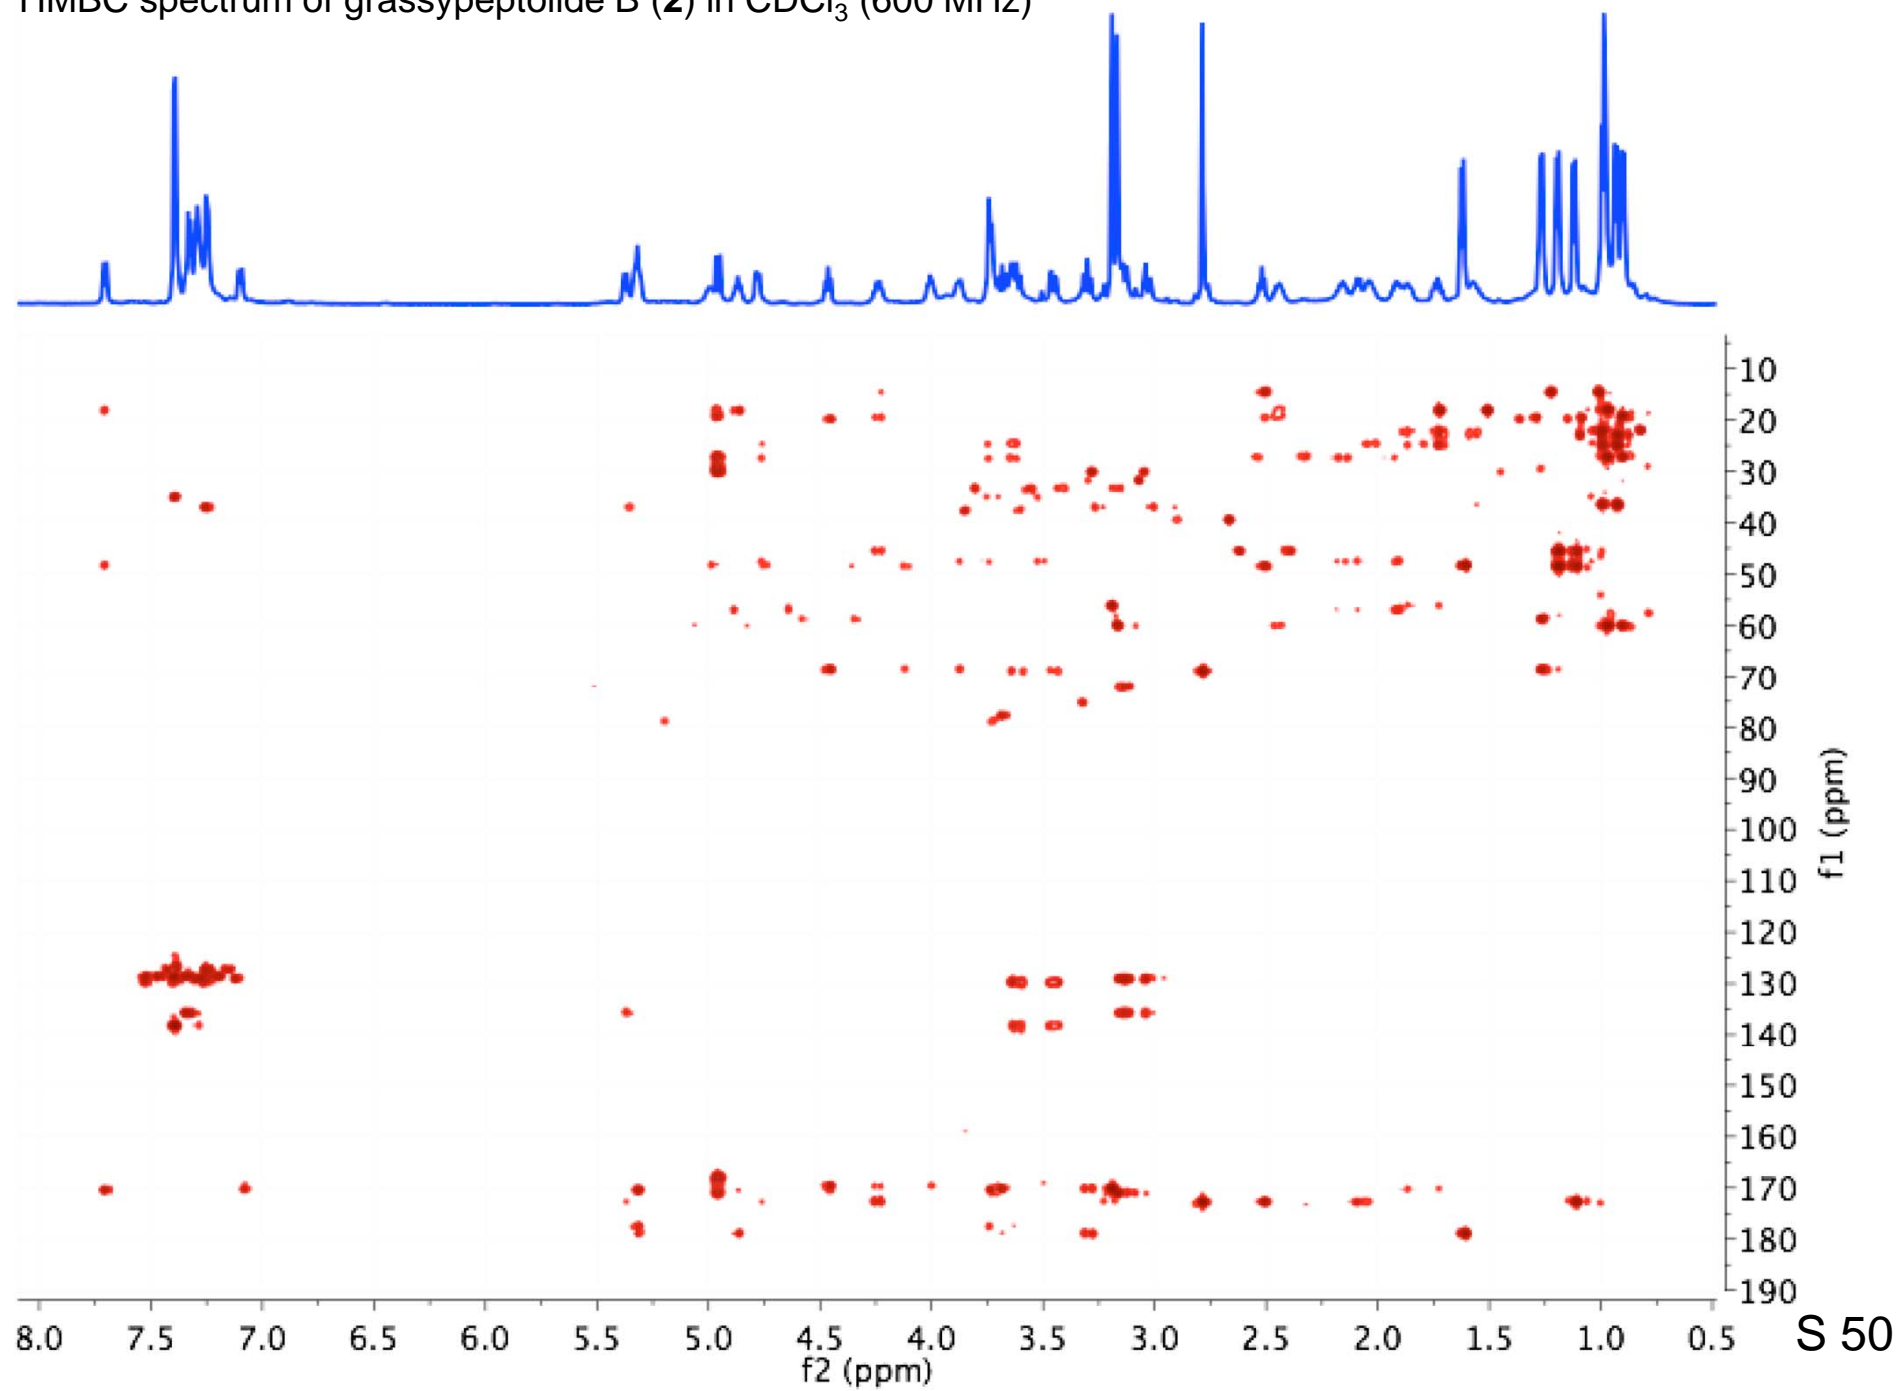

ROESY spectrum of grassypeptolide B (**2**) in  $\text{CDCl}_3$  (600 MHz)

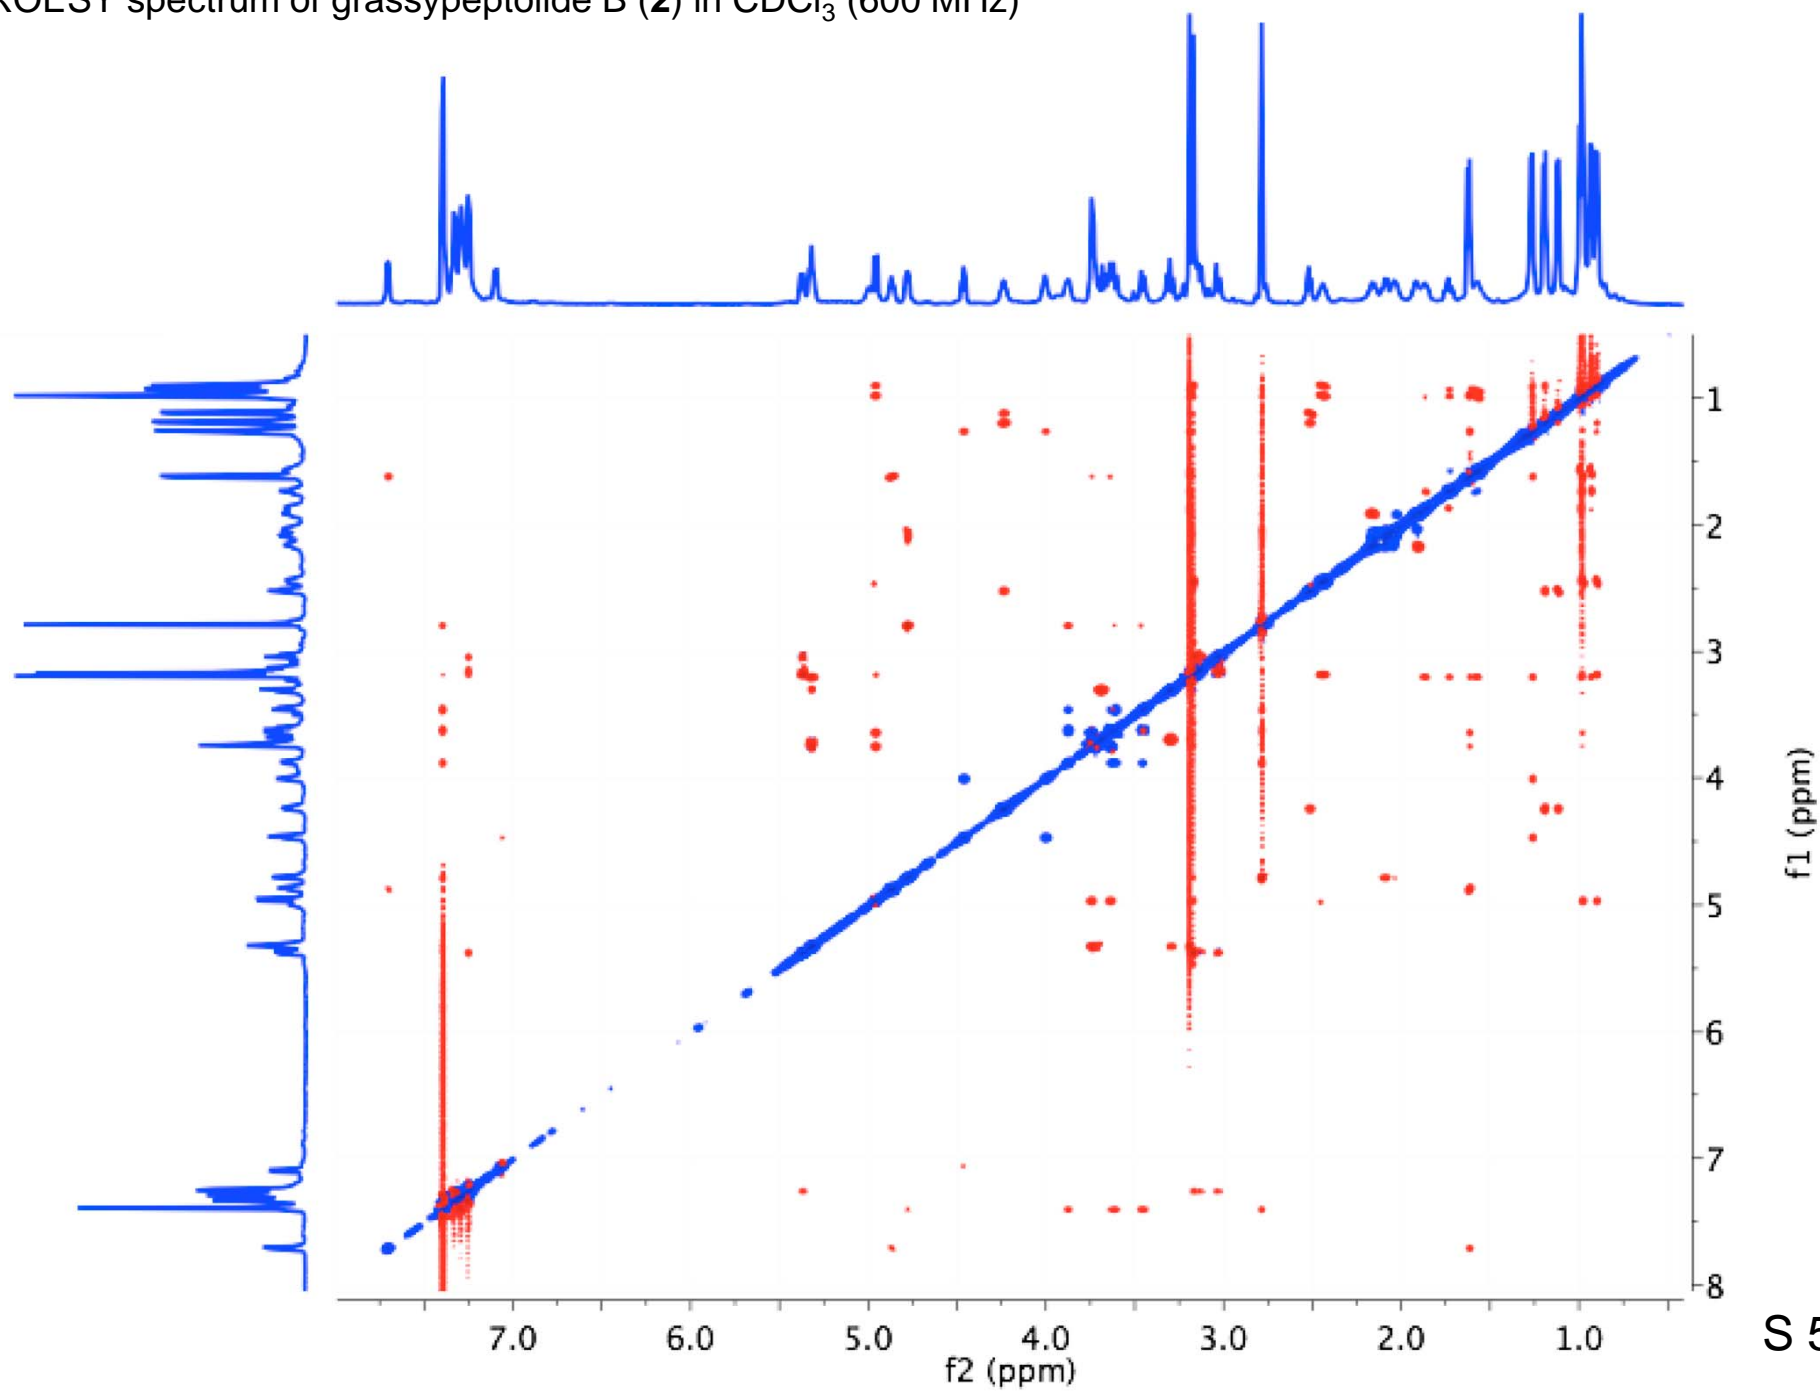

$^1\text{H}$  NMR spectrum of grassypeptolide C (**3**) in  $\text{CDCl}_3$  (600 MHz)

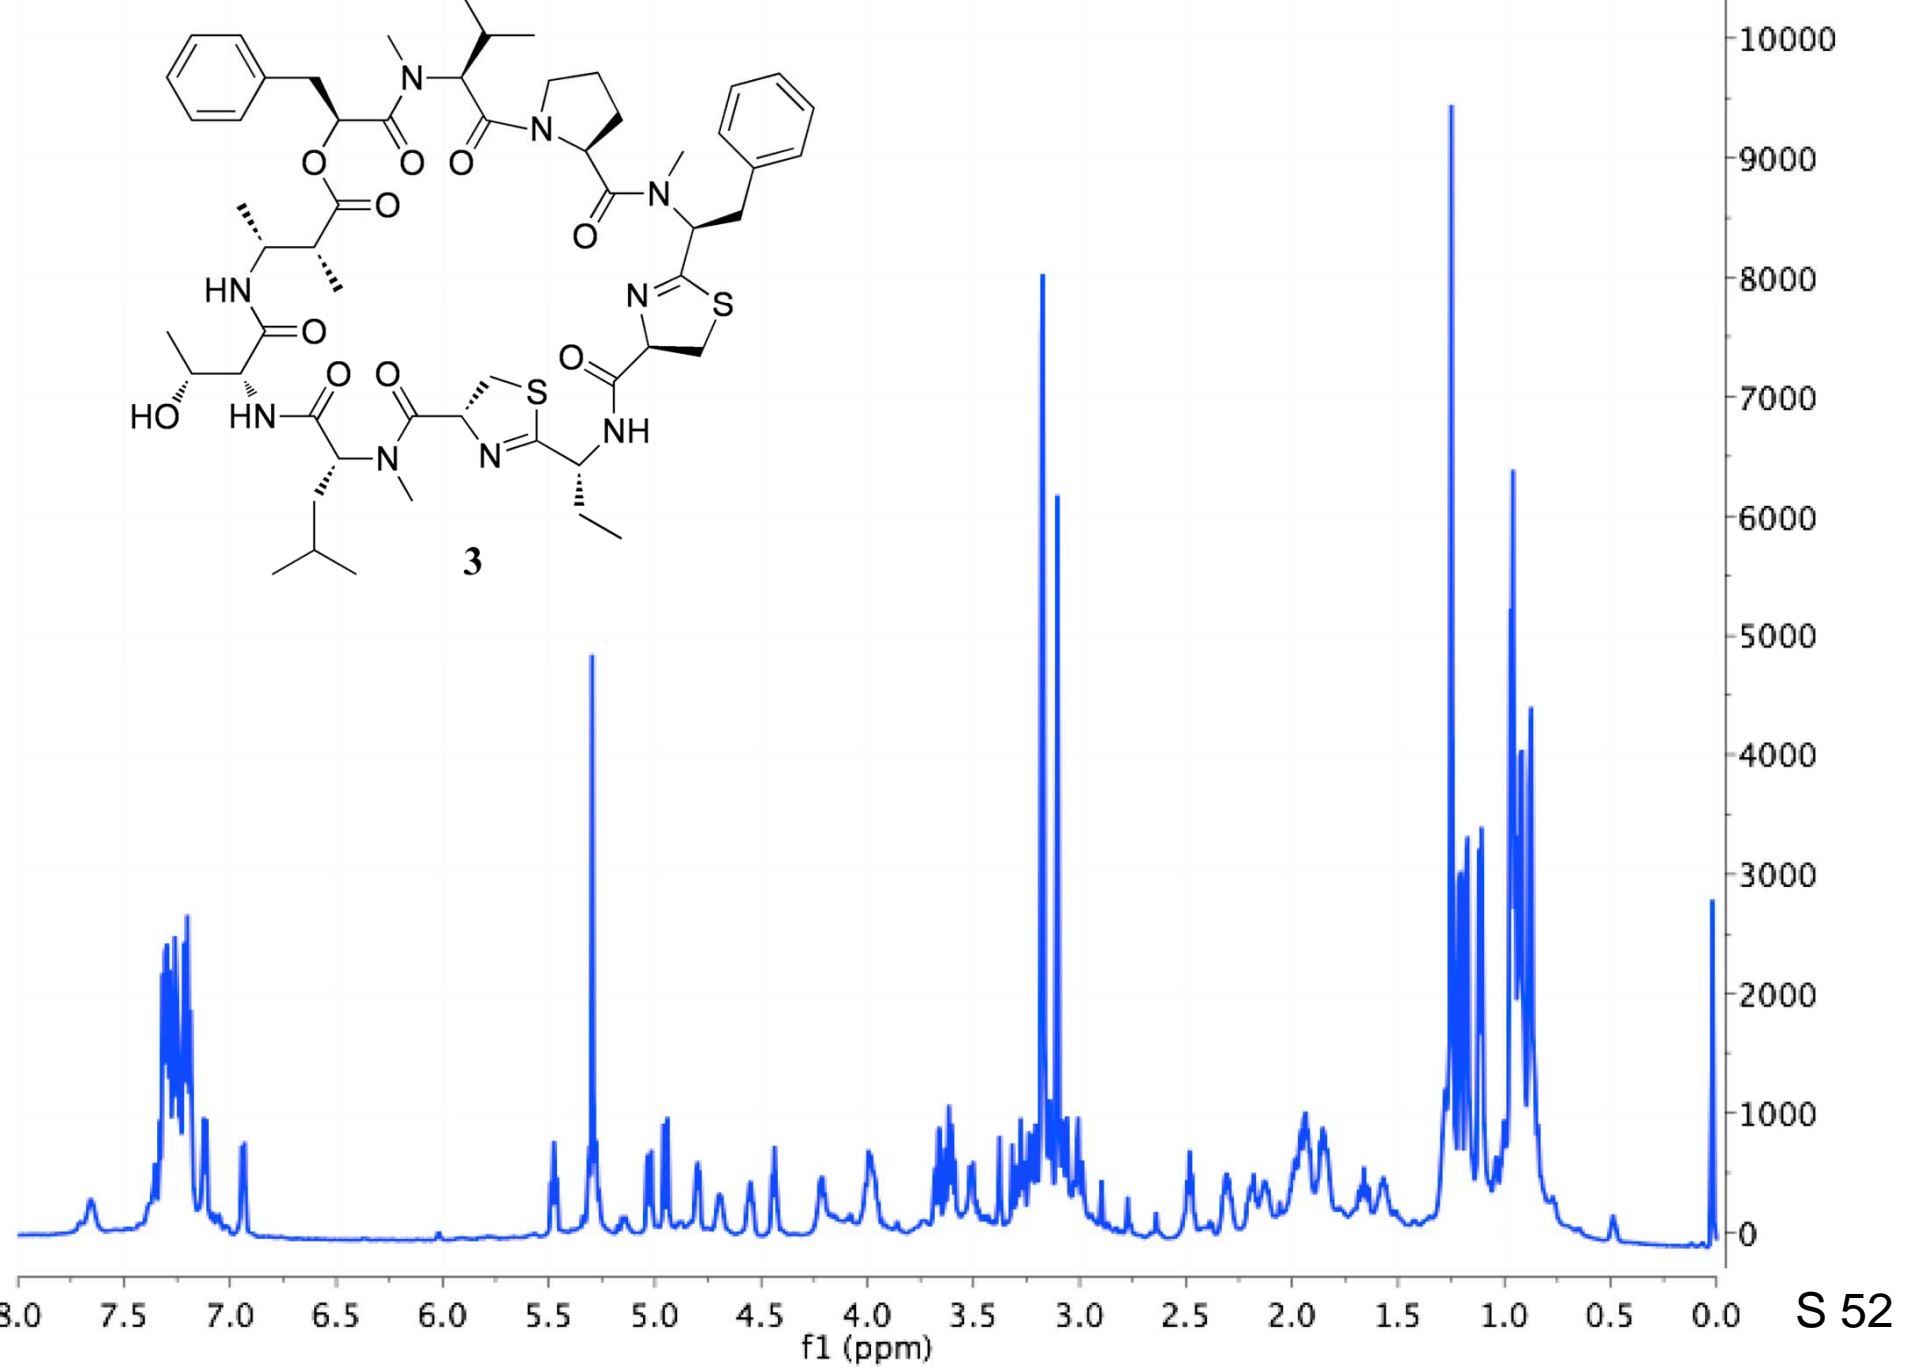

COSY spectrum of grassypeptolide C (**3**) in CDCl<sub>3</sub> (600 MHz)

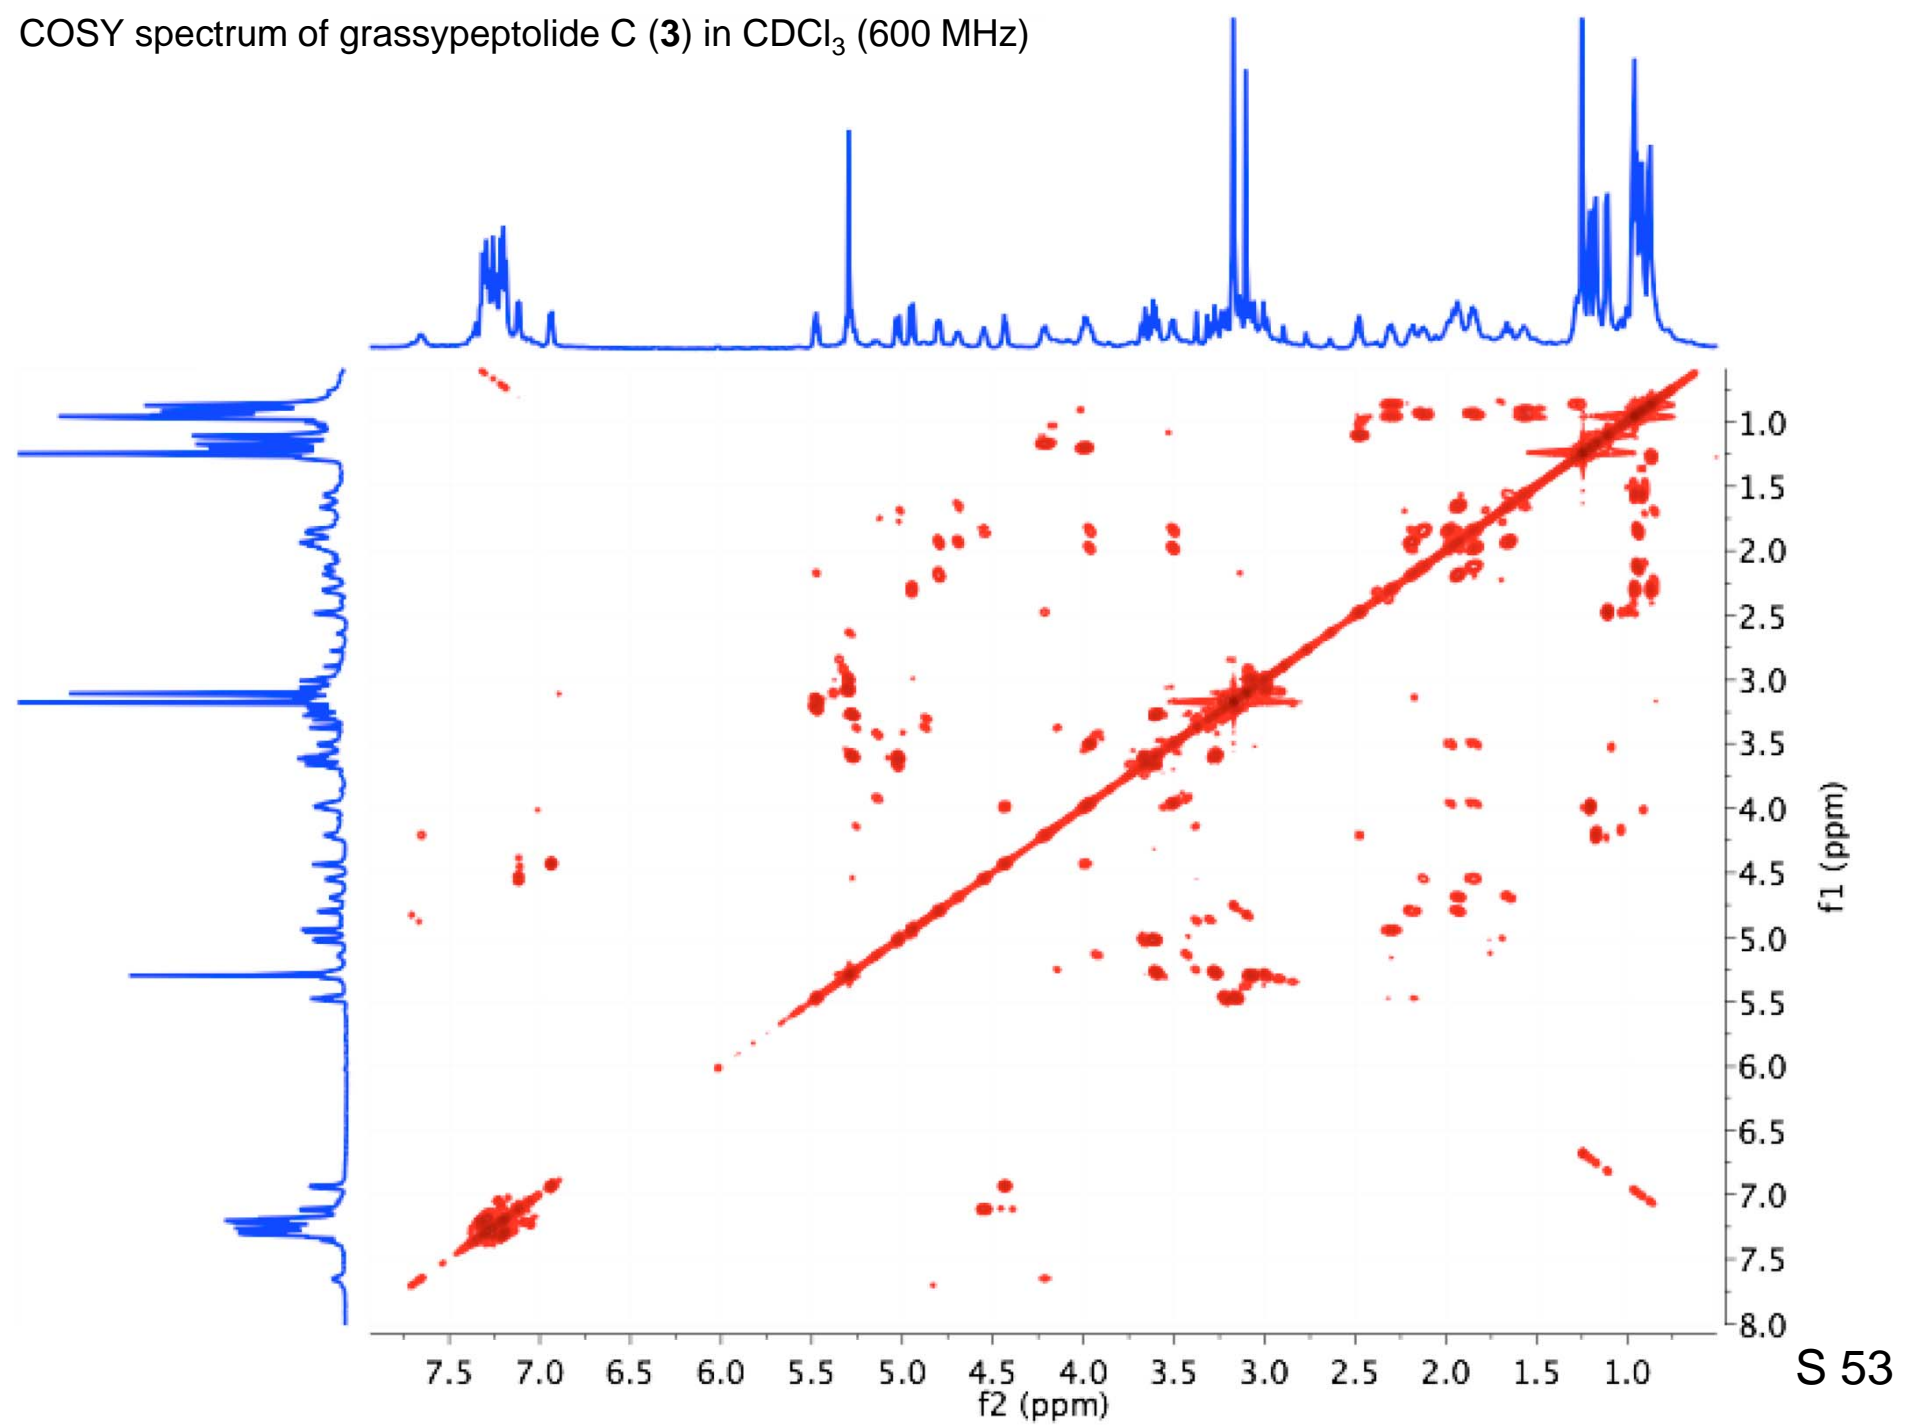

Edited HSQC spectrum of grassypeptolide C (**3**) in CDCl<sub>3</sub> (600 MHz)

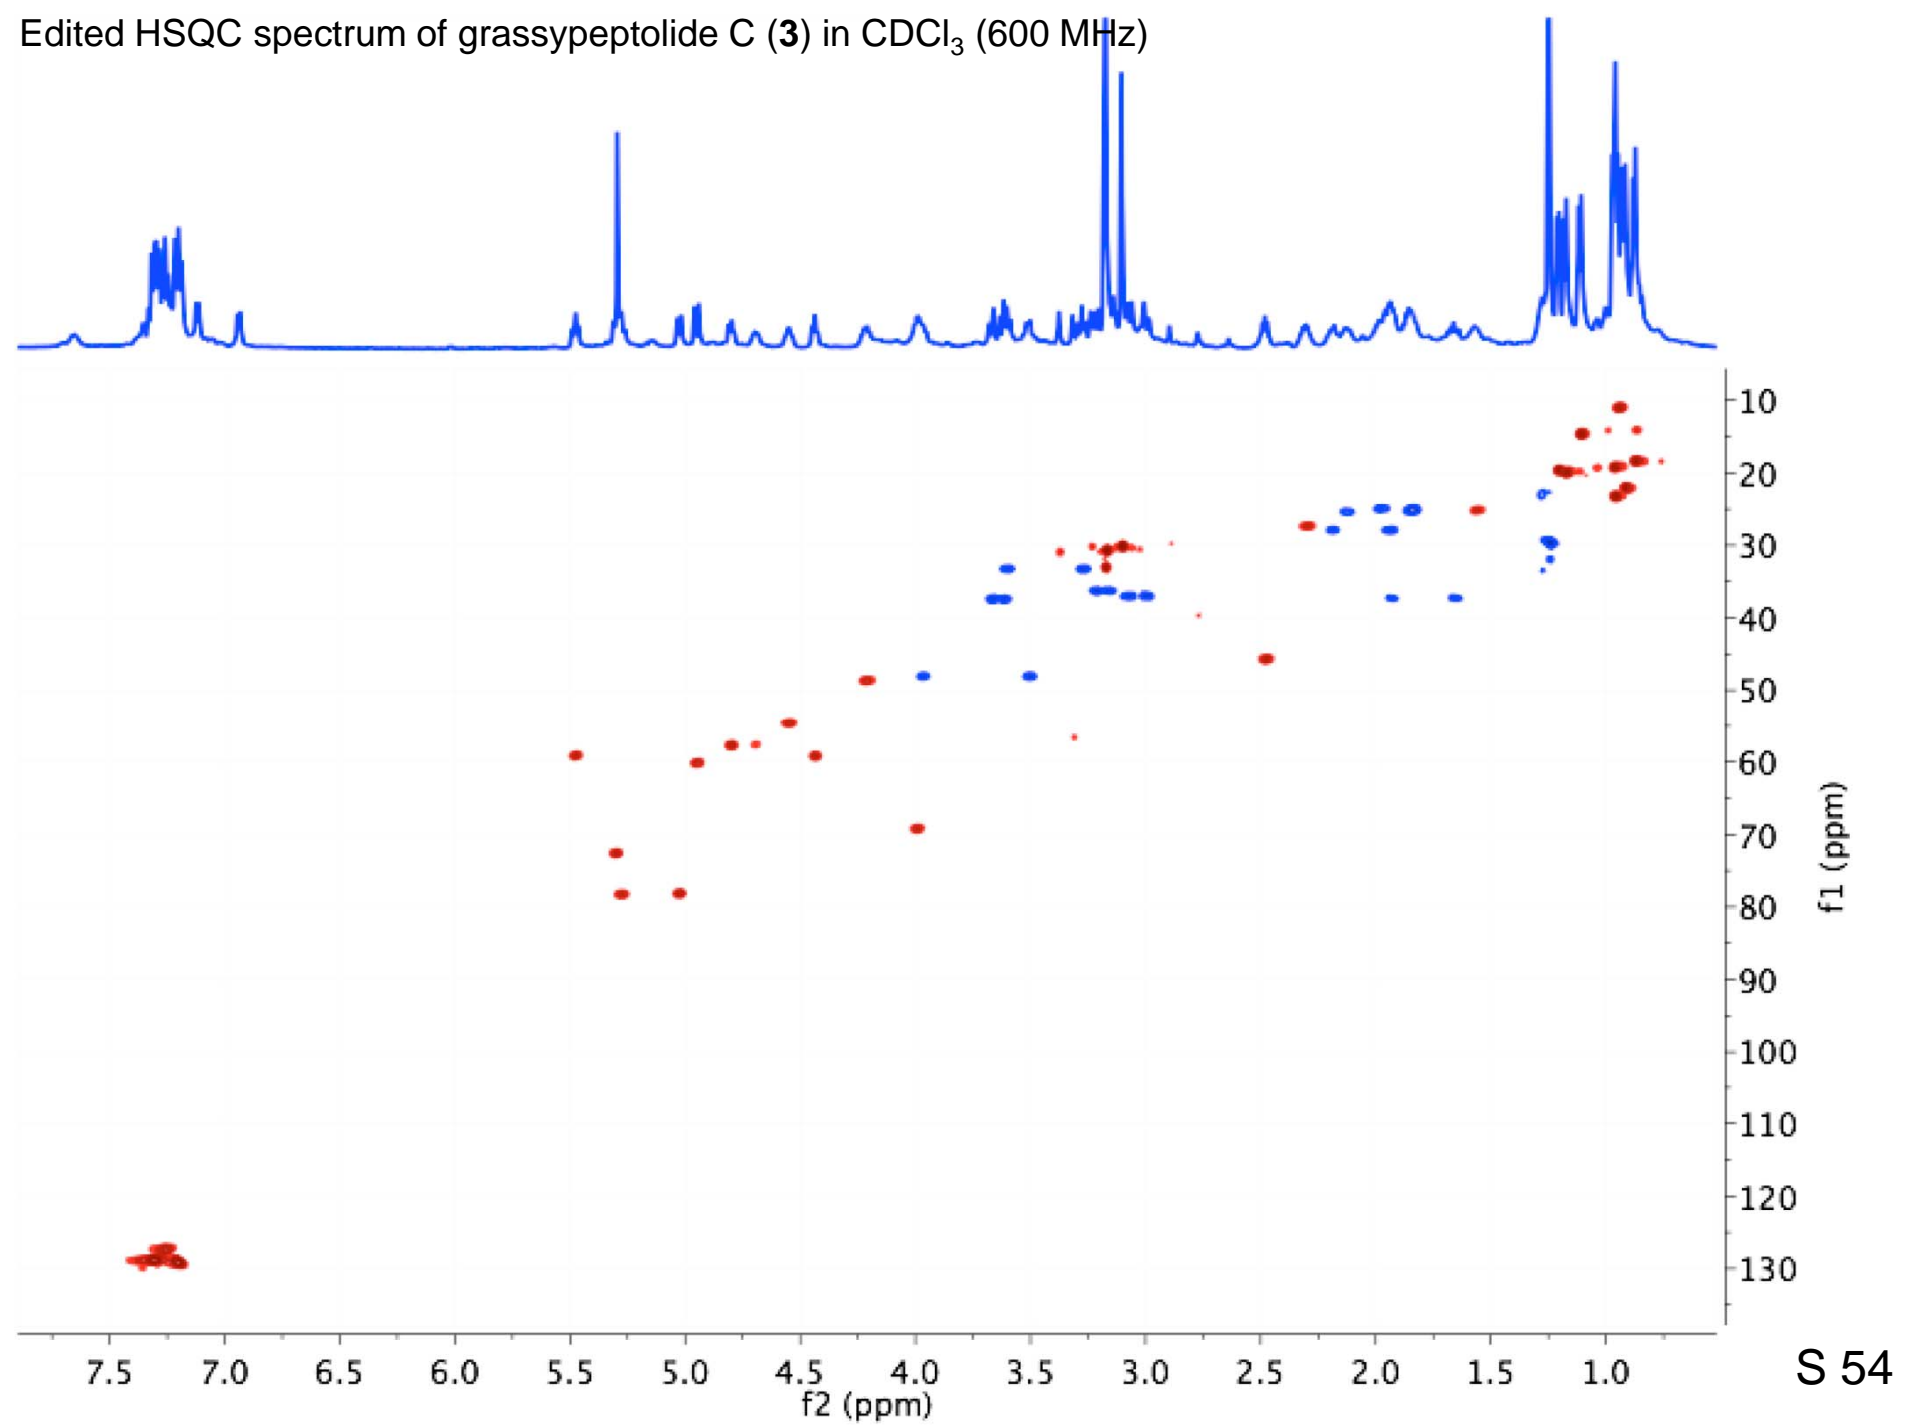

HMBC spectrum of grassypeptolide C (**3**) in CDCl<sub>3</sub> (600 MHz)

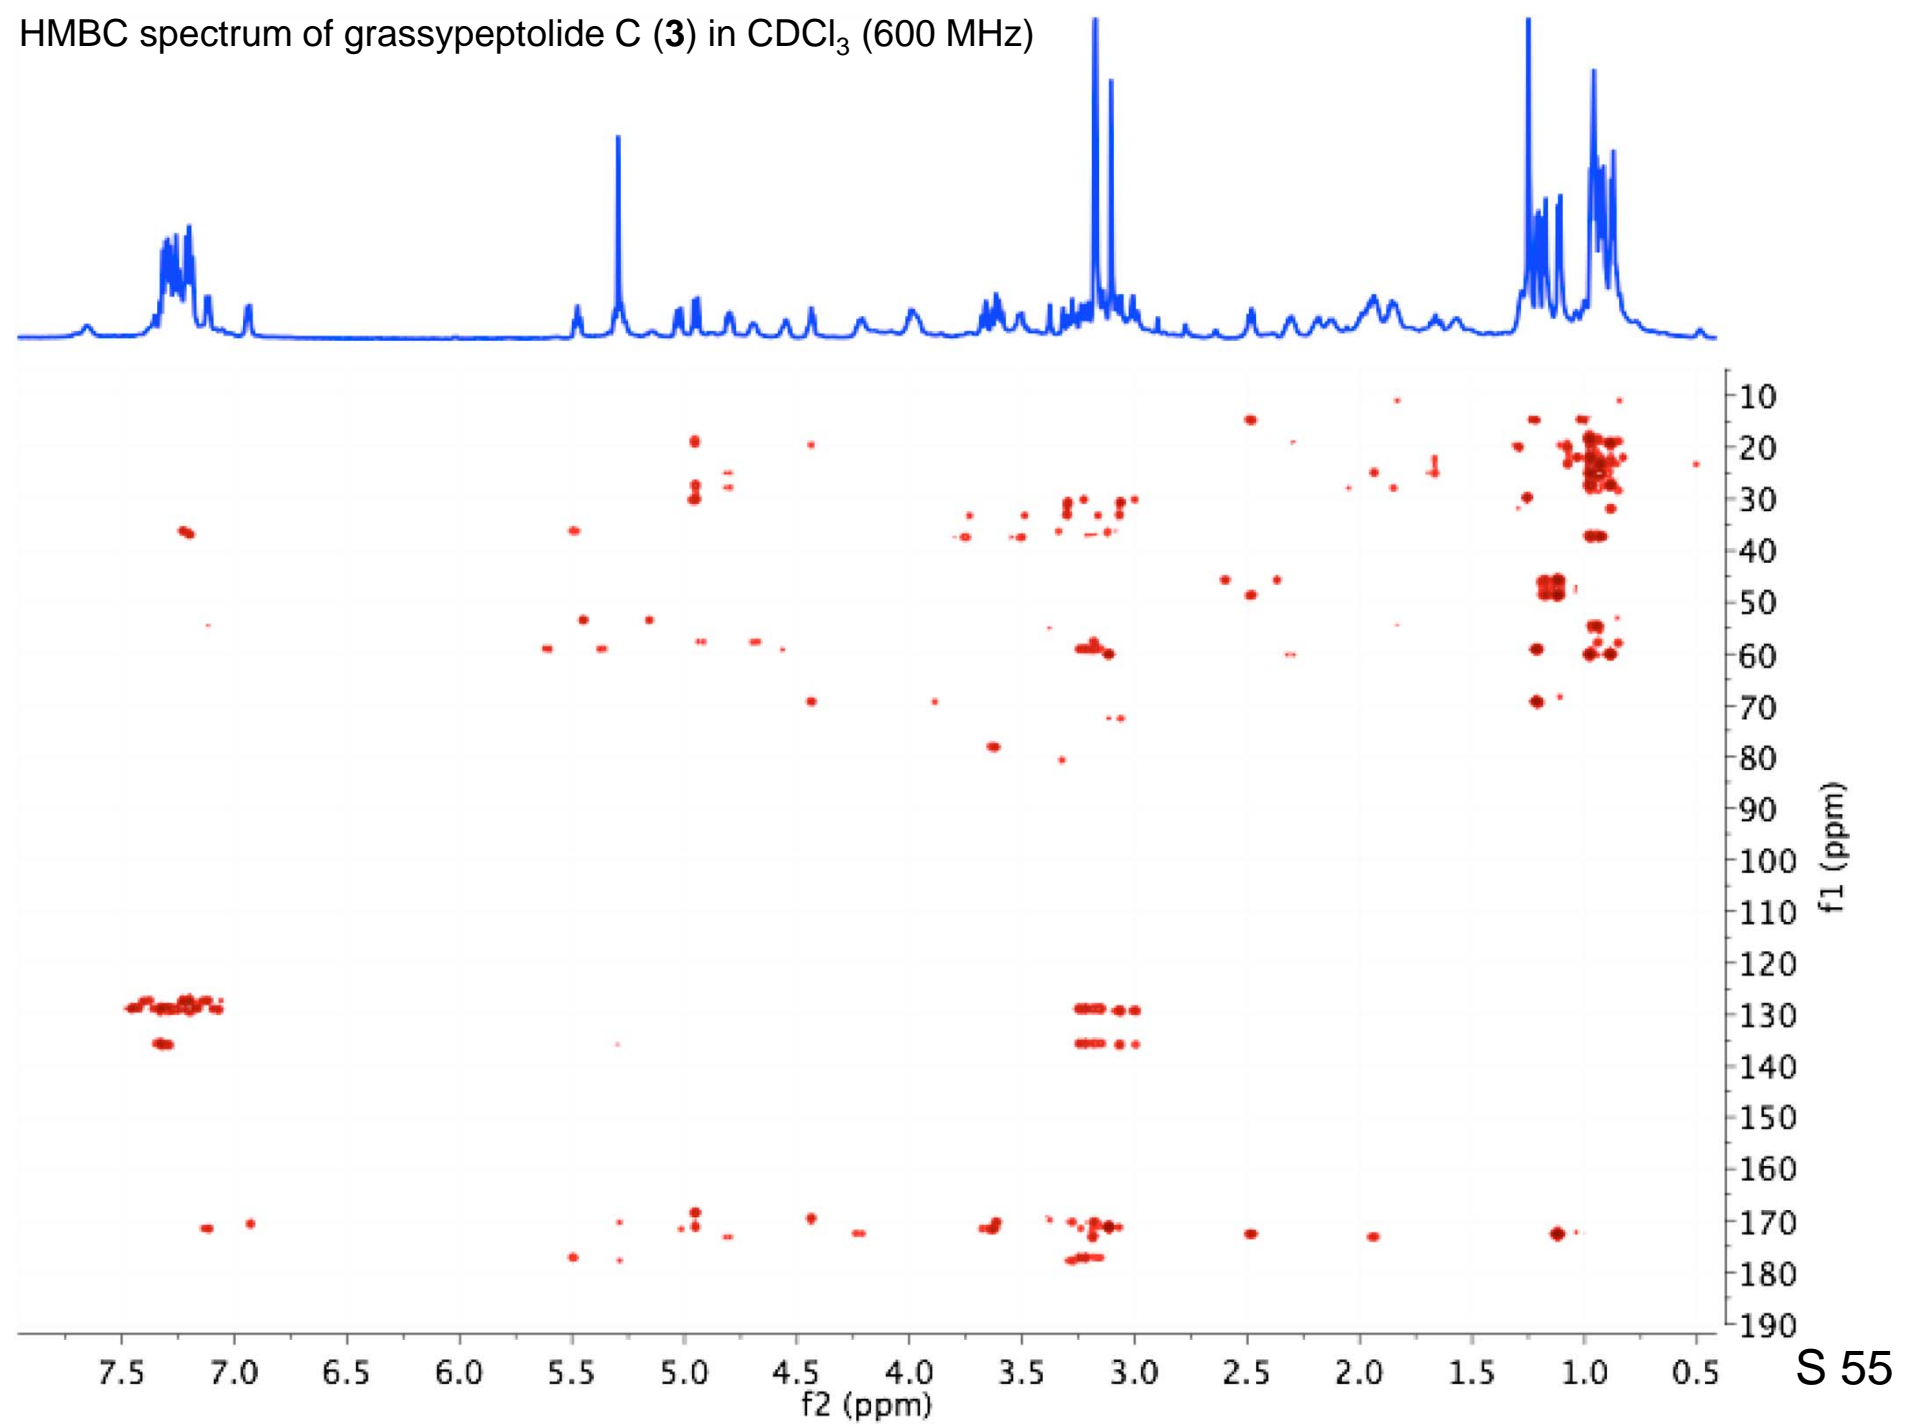

ROESY spectrum of grassypeptolide C (**3**) in CDCl<sub>3</sub> (600 MHz)

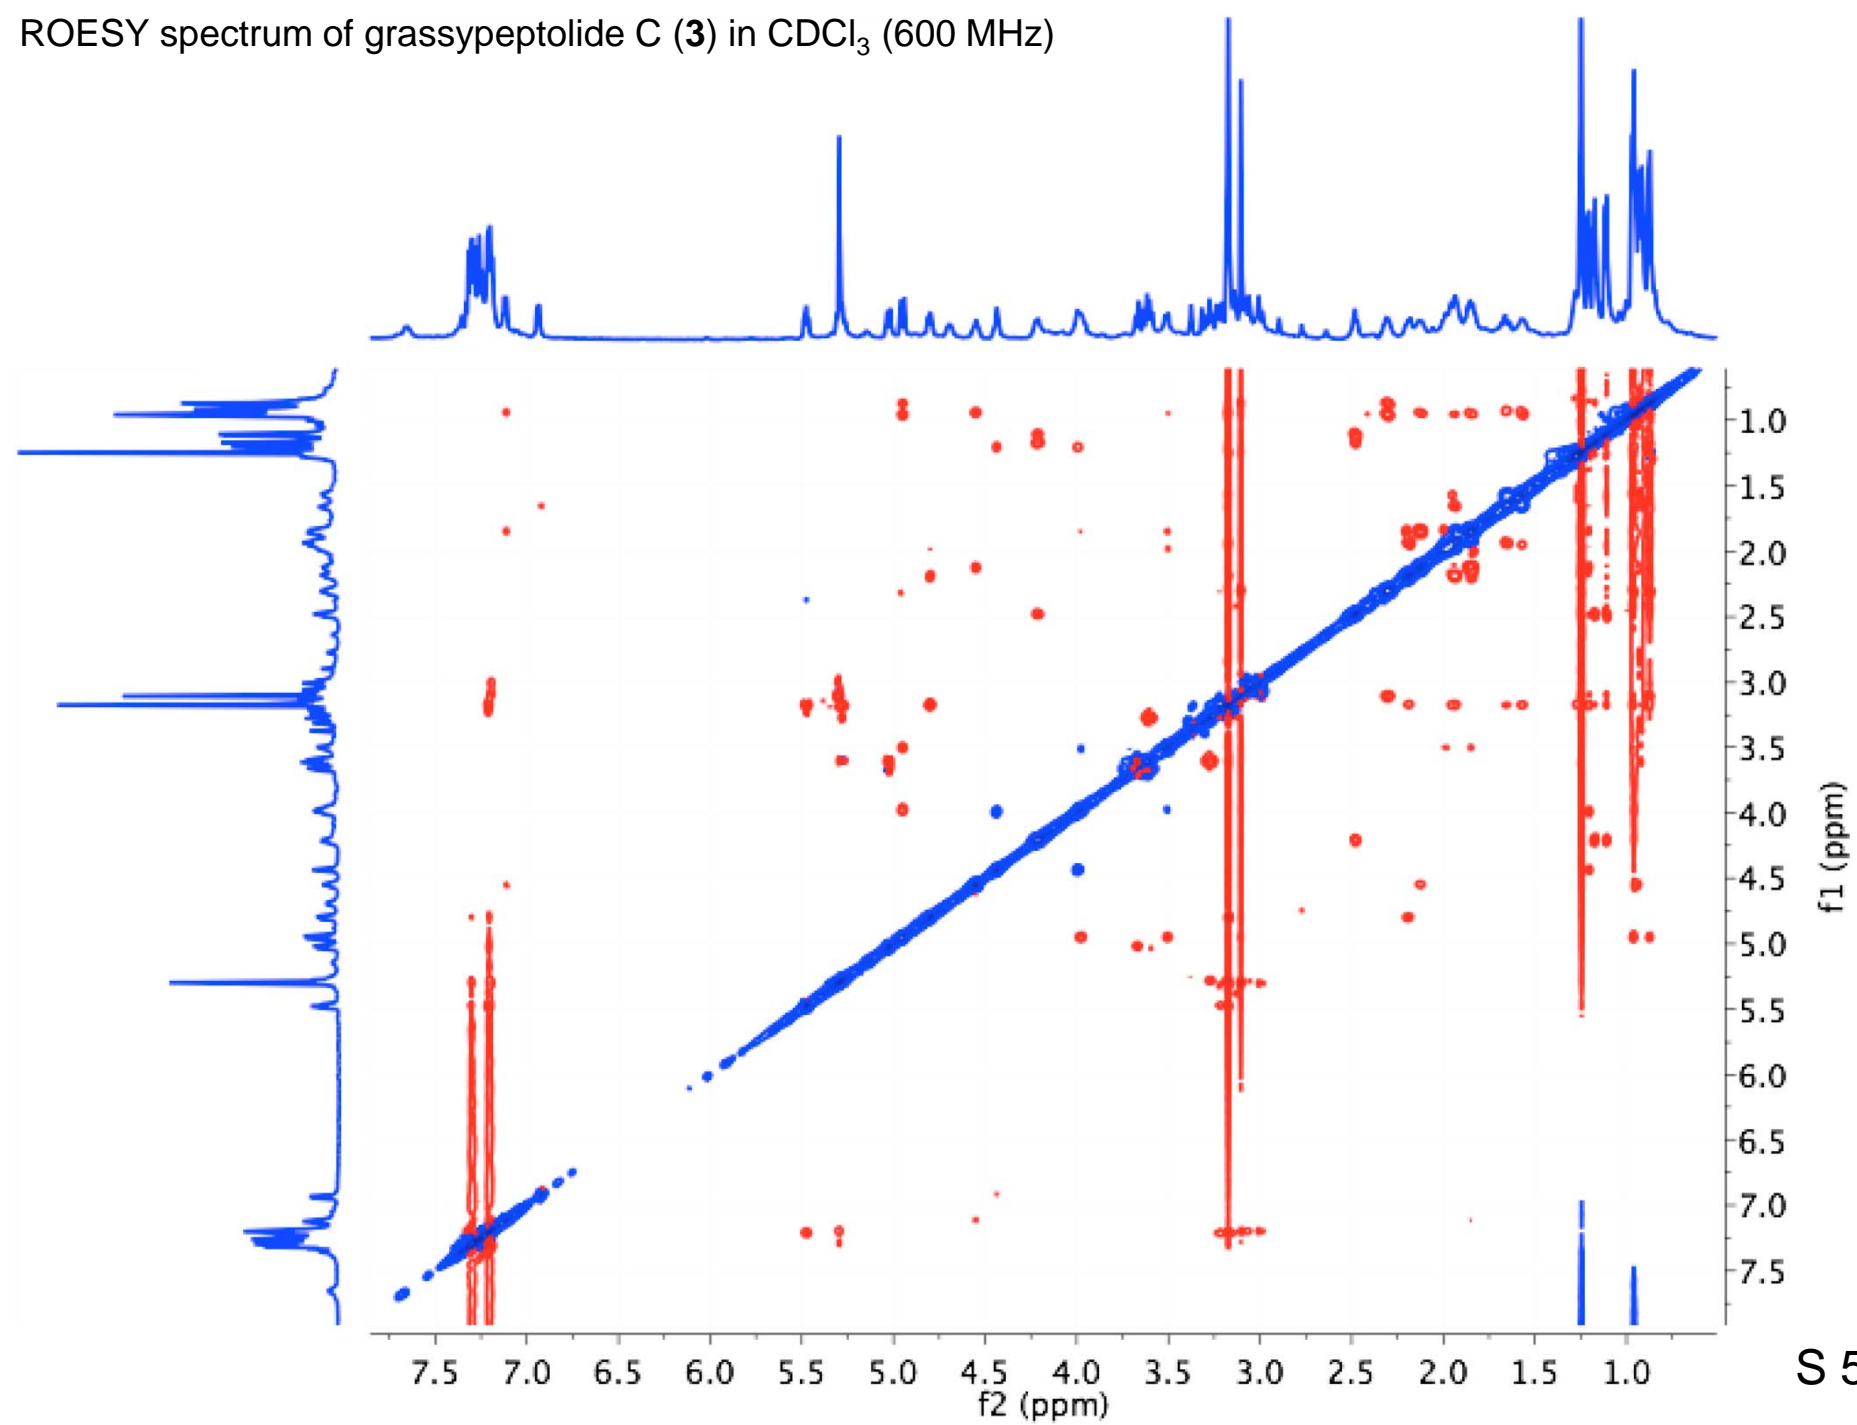

Supplement: jo1013564_si_001.pdf [file jo1013564_si_001.pdf]
